# Supplementary material for: A novel homobimetallic nickel complex for the asymmetric direct Mannich reaction of imines: a practical method on a multi-gram scale
Source: Royal Society of Chemistry journal article supplement (doi:10.1039/c7cc06468c), 2017-01-01
Supplement: c7cc06468c1.pdf [file c7cc06468c1.pdf]

**Supporting Information for:**

**A Novel Homobimetallic Nickel Complex for Asymmetric Direct  
Mannich Reaction of Imines: A Practical Method on a Multi-Gram  
Scale**

Shixiong Zhang, Ping Deng, Jing Zhou, Mouxiong Liu, Guojuan Liang, Yan Xiong, and Hui  
Zhou\*

*hzhou@cqmu.edu.cn*

*School of Pharmaceutical Science, Chongqing Medical University, and School of Chemistry and  
Chemical Engineering, Chongqing University, Chongqing, China*

**Contents:**

|                                                                                                 |     |
|-------------------------------------------------------------------------------------------------|-----|
| 1. General information.....                                                                     | S2  |
| 2. General preparation procedure and characterization of the ligands .....                      | S2  |
| 3. Other optimizations of the Mannich reaction .....                                            | S5  |
| 4. General procedure for the catalytic Mannich reaction .....                                   | S7  |
| 5. General procedure for the synthesis of azirdines.....                                        | S8  |
| 6. Miscellaneous analyses of the complexes .....                                                | S9  |
| 6.1 ESI-MS analysis of the complexes .....                                                      | S9  |
| 6.2 The structure of the dinuclear Ni-aminophenol sulfonamide complex<br>optimized by DFT ..... | S15 |
| 7. The X-ray data for <b>2k</b> .....                                                           | S17 |
| 8. Postulated working model .....                                                               | S18 |
| 9. Characterization of products.....                                                            | S18 |
| 10. Copies of NMR spectra .....                                                                 | S31 |

## 1. General information

All reagents were obtained from Acros, Adamas, or TCI etc. without further purification unless otherwise noted. High resolution mass spectra were recorded with a Bruker Solarix FT-ICR-MS system. NMR spectra were recorded on commercial instruments and operating at 500 MHz for  $^1\text{H}$  NMR and 125 MHz for  $^{13}\text{C}$  NMR. Chemical shifts were reported in ppm from tetramethylsilane with the solvent resonance as the internal standard ( $\text{CDCl}_3$ ,  $\delta = 7.26$  or  $(\text{CD}_3)_2\text{SO}$   $\delta = 2.50$ ) in  $^1\text{H}$  NMR spectra and Chemical shifts were reported in ppm from the tetramethylsilane with the solvent resonance as internal standard ( $\text{CDCl}_3$ ,  $\delta = 77.0$  or  $(\text{CD}_3)_2\text{SO}$   $\delta = 39.5$ ) in  $^{13}\text{C}$  NMR spectra. Spectra are reported as follows: chemical shift ( $\delta$  ppm), multiplicity (s = singlet, d = doublet, t = triplet, q = quartet, m = multiplet), coupling constants (Hz), integration, and assignment. The enantiomeric excess (*ee*) was determined by HPLC analysis. Analytical HPLC was performed on a Shimadzu liquid chromatography, using a chiral DAICEL CHIRALCEL OD-H or OJ-H or CHIRALPAK IA or AD-H column at 220 nm. Optical rotations were measured on a commercial polarimeter and are reported as follows:  $[\alpha]_{\text{D}}^{\text{T}}$  ( $c = \text{g}/100 \text{ mL}$ , solvent).

## 2. General preparation procedure and characterization of the ligands

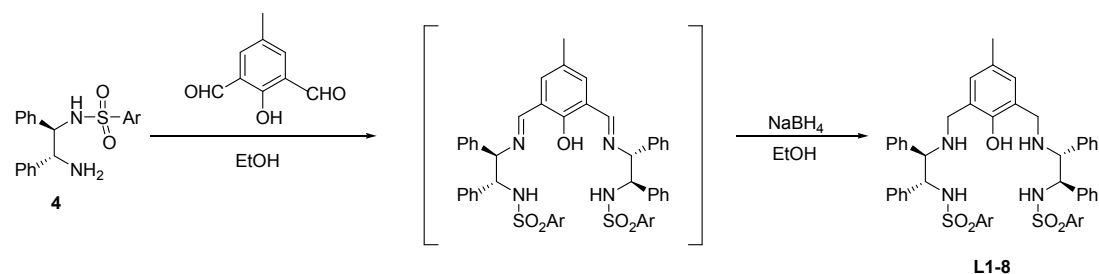

To a solution of **4** (3.6 mmol) in 50 mL ethanol was slowly added the dialdehyde (1.8 mmol), and the mixture was stirred at room temperature until the reaction proceeded completely detected by TLC. Sodium borohydride (14.4 mmol) was then added in small portions at 0 °C. And then the reaction was allowed to warm to ambient temperature and detected by TLC. It was poured over 120 mL of water and extracted with  $\text{CH}_2\text{Cl}_2$ . The combined organic phase was washed with Sat. NaCl and dried with anhydrous  $\text{Na}_2\text{SO}_4$ , and the solvents were removed in vacuo and purified through column chromatography (petroleum ether /AcOEt = 4 : 1) on silica gel to obtain L1-8.

L9 and L10 were synthesized by the analogy of L1-8.

**L1:** White solid;  $[\alpha]_{\text{D}}^{25} = -51.8$  ( $c$  0.74,  $\text{CH}_2\text{Cl}_2$ );  $^1\text{H}$  NMR (500 MHz,  $\text{CDCl}_3$ )  $\delta$  7.46 (d,  $J = 8.1$ , 4H), 7.18-7.13 (m, 6H), 7.06 (d,  $J = 6.4$ , 4H), 6.95-6.86 (m, 10H), 6.77 (d,  $J = 7.0$ , 4H), 6.66 (s, 2H), 4.40 (d,  $J = 9.3$ , 2H), 3.92 (d,  $J = 9.4$ , 2H), 3.74 (d,  $J = 12.9$ , 2H), 3.60 (d,  $J = 12.9$ , 2H), 2.24

(s, 6H), 2.17 (s, 3H);  $^{13}\text{C}$  NMR (125 MHz,  $\text{CDCl}_3$ )  $\delta$  153.3, 141.2, 137.7, 136.5, 136.1, 127.72, 127.65, 126.9, 126.6, 126.4, 126.2, 126.14, 126.11, 125.7, 125.6, 122.6, 66.5, 62.5, 48.0, 20.0, 19.0; ESI-HRMS calcd for  $\text{C}_{51}\text{H}_{53}\text{N}_4\text{O}_5\text{S}_2^+$   $[\text{M} + \text{H}]^+$ : 865.3452, found 865.3454.

**L2:** White solid;  $[\alpha]_{\text{D}}^{25} = -48.9$  (*c* 0.92,  $\text{CH}_2\text{Cl}_2$ );  $^1\text{H}$  NMR (500 MHz,  $\text{CDCl}_3$ )  $\delta$  7.48 (d, *J* = 7.9, 4H), 7.16-7.05 (m, 15H), 6.86-6.79 (m, 6H), 6.69 (s, 6H), 4.34 (d, *J* = 9.4, 2H), 4.01 (d, *J* = 9.5, 2H), 3.74 (d, *J* = 12.8, 2H), 3.61 (d, *J* = 12.8, 2H), 2.18 (s, 3H), 1.20 (s, 18H);  $^{13}\text{C}$  NMR (125 MHz,  $\text{CDCl}_3$ )  $\delta$  154.5, 153.8, 138.1, 136.5, 136.2, 128.1, 127.2, 127.0, 126.7, 126.5, 126.4, 126.4, 125.9, 125.9, 124.3, 122.9, 66.7, 63.0, 48.4, 33.8, 30.0, 19.3; ESI-HRMS calcd for  $\text{C}_{57}\text{H}_{65}\text{N}_4\text{O}_5\text{S}_2^+$   $[\text{M} + \text{H}]^+$ : 949.4391, found 949.4347.

**L3:** White solid;  $[\alpha]_{\text{D}}^{25} = -62.0$  (*c* 0.64,  $\text{CH}_2\text{Cl}_2$ );  $^1\text{H}$  NMR (500 MHz,  $\text{CDCl}_3$ )  $\delta$  7.50 (d, *J* = 8.4, 4H), 7.17-7.15 (m, 6H), 7.05 (d, *J* = 6.4, 4H), 6.93-6.89 (m, 6H), 6.76 (d, *J* = 6.7, 4H), 6.66 (s, 2H), 6.57 (d, *J* = 8.4, 4H), 4.36 (d, *J* = 9.2, 2H), 3.69 (d, *J* = 9.3, 2H), 3.73 (d, *J* = 13.0, 2H), 3.70 (s, 6H), 3.59 (d, *J* = 12.9, 2H), 2.17 (s, 3H);  $^{13}\text{C}$  NMR (125 MHz,  $\text{CDCl}_3$ )  $\delta$  161.2, 153.6, 138.0, 136.8, 131.1, 128.1, 128.0, 127.2, 126.9, 126.8, 126.5, 126.5, 126.4, 126.0, 123.0, 112.6, 66.8, 62.9, 54.4, 48.3, 19.3; ESI-HRMS calcd for  $\text{C}_{51}\text{H}_{53}\text{N}_4\text{O}_7\text{S}_2^+$   $[\text{M} + \text{H}]^+$ : 897.3350, found 897.3318.

**L4:** Yellow solid;  $[\alpha]_{\text{D}}^{25} = -33.8$  (*c* 0.40,  $\text{CH}_2\text{Cl}_2$ );  $^1\text{H}$  NMR (500 MHz,  $\text{CDCl}_3$ )  $\delta$  7.93 (d, *J* = 8.2, 4H), 7.69 (d, *J* = 8.2, 4H), 7.24-7.14 (m, 6H), 7.06 (d, *J* = 5.9, 4H), 6.99-6.91 (m, 6H), 6.84 (d, *J* = 7.1, 4H), 6.64 (s, 2H), 4.50 (d, *J* = 8.7, 2H), 3.94 (d, *J* = 8.7, 2H), 3.76 (d, *J* = 12.8, 2H), 3.63 (d, *J* = 12.8, 2H), 2.14 (s, 3H);  $^{13}\text{C}$  NMR (125 MHz,  $\text{CDCl}_3$ )  $\delta$  153.3, 148.3, 145.2, 137.4, 136.2, 128.2, 127.5, 127.2, 127.1, 127.0, 126.8, 126.6, 126.5, 122.9, 122.5, 66.9, 62.9, 48.8, 19.3; ESI-HRMS calcd for  $\text{C}_{49}\text{H}_{47}\text{N}_6\text{O}_9\text{S}_2^+$   $[\text{M} + \text{H}]^+$ : 927.2840, found 927.2834.

**L5:** Yellow solid;  $[\alpha]_{\text{D}}^{25} = -21.6$  (*c* 0.44,  $\text{CH}_2\text{Cl}_2$ );  $^1\text{H}$  NMR (500 MHz,  $\text{CDCl}_3$ )  $\delta$  8.23 (s, 2H), 8.09 (d, *J* = 8.1, 2H), 7.91 (d, *J* = 7.7, 2H), 7.33 (t, *J* = 7.8, 2H), 7.16-7.2 (m, 6H), 7.08 (d, *J* = 6.6, 4H), 6.90-6.84 (m, 10H), 6.65 (s, 2H), 4.53 (d, *J* = 9.0, 2H), 3.96 (d, *J* = 9.0, 2H), 3.76 (d, *J* = 12.8, 2H), 3.65 (d, *J* = 12.9, 2H), 2.14 (s, 3H);  $^{13}\text{C}$  NMR (125 MHz,  $\text{CDCl}_3$ )  $\delta$  153.4, 146.5, 141.5, 137.5, 135.9, 131.5, 128.7, 128.2, 127.5, 127.1, 126.9, 126.8, 126.7, 126.5, 125.3, 122.9, 121.4, 66.9, 63.0, 48.8, 19.3; ESI-HRMS calcd for  $\text{C}_{49}\text{H}_{47}\text{N}_6\text{O}_9\text{S}_2^+$   $[\text{M} + \text{H}]^+$ : 927.2840, found 927.2849.

**L6:** White solid;  $[\alpha]_{\text{D}}^{25} = -38.7$  (*c* 0.78,  $\text{CH}_2\text{Cl}_2$ );  $^1\text{H}$  NMR (500 MHz,  $\text{CDCl}_3$ )  $\delta$  7.55 (d, *J* = 7.6, 4H), 7.26-7.23 (m, 2H), 7.15-7.03 (m, 14H), 6.89-6.83 (m, 6H), 6.74 (d, *J* = 6.9, 4H), 6.65 (s, 2H), 4.39 (d, *J* = 9.2, 2H), 3.97 (d, *J* = 9.3, 2H), 3.73 (d, *J* = 12.9, 2H), 3.59 (d, *J* = 12.8, 2H), 2.15 (s, 3H);  $^{13}\text{C}$  NMR (125 MHz,  $\text{CDCl}_3$ )  $\delta$  153.6, 139.3, 138.0, 136.6, 130.9, 128.1, 127.4, 127.3, 126.9, 126.8, 126.6, 126.5, 126.4, 126.1, 126.0, 122.9, 66.8, 62.9, 48.4, 19.3; ESI-HRMS calcd for

$C_{49}H_{49}N_4O_5S_2^+ [M + H]^+$ : 837.3139, found 837.3100.

**L7:** White solid;  $[\alpha]_D^{25} = +53.3$  (*c* 0.40,  $CH_2Cl_2$ );  $^1H$  NMR (500 MHz,  $CDCl_3$ )  $\delta$  8.64 (d, *J* = 8.5, 2H), 7.94 (d, *J* = 7.1, 2H), 7.76 (d, *J* = 8.0, 2H), 7.69 (d, *J* = 8.0, 2H), 7.36 (t, *J* = 7.0, 2H), 7.22-7.16 (m, 4H), 7.08 (s, 6H), 6.94-6.93 (m, 4H), 6.91-6.72 (m, 2H), 6.67-6.65 (m, 10H), 4.36 (d, *J* = 8.9, 2H), 3.88 (d, *J* = 8.9, 2H), 3.75 (d, *J* = 12.9, 2H), 3.60 (d, *J* = 13.0, 2H), 2.20 (s, 3H);  $^{13}C$  NMR (125 MHz,  $CDCl_3$ )  $\delta$  153.4, 137.8, 136.3, 134.1, 132.8, 132.6, 128.4, 127.9, 127.4, 127.2, 127.0, 126.8, 126.7, 126.5, 126.4, 126.4, 126.1, 125.9, 125.4, 123.7, 123.1, 122.7, 66.8, 62.9, 48.5, 19.4; ESI-HRMS calcd for  $C_{57}H_{53}N_4O_5S_2^+ [M + H]^+$ : 937.3452, found 937.3408.

**L8:** White solid;  $[\alpha]_D^{25} = -90.0$  (*c* 1.00,  $CH_2Cl_2$ );  $^1H$  NMR (500 MHz,  $CDCl_3$ )  $\delta$  8.14 (s, 2H), 7.68 (d, *J* = 8.0, 2H), 7.57 (d, *J* = 8.1, 4H), 7.52-7.47 (m, 4H), 7.44-7.41 (m, 2H), 7.15-7.04 (m, 10H), 6.78-6.69 (m, 12H), 4.48 (d, *J* = 9.2, 2H), 4.02 (d, *J* = 9.3, 2H), 3.76 (d, *J* = 12.9, 2H), 3.65 (d, *J* = 12.9, 2H), 2.19 (s, 3H);  $^{13}C$  NMR (125 MHz,  $CDCl_3$ )  $\delta$  153.7, 138.0, 136.6, 136.3, 133.3, 130.7, 128.0, 127.7, 127.4, 127.2, 126.8, 126.7, 126.6, 126.5, 126.4, 126.4, 126.0, 125.9, 123.1, 121.3, 66.9, 63.0, 48.5, 19.3; ESI-HRMS calcd for  $C_{57}H_{53}N_4O_5S_2^+ [M + H]^+$ : 937.3452, found 937.3464.

**L9:** Pale yellow solid;  $[\alpha]_D^{25} = +164.6$  (*c* 0.47,  $CH_3OH$ );  $^1H$  NMR (500 MHz,  $(CD_3)_2SO$ )  $\delta$  8.01 (d, *J* = 8.0, 2H), 7.66 (d, *J* = 7.8, 2H), 7.10-7.02 (m, 6H), 6.94-6.82 (m, 6H), 6.73 (d, *J* = 7.6, 1H), 6.67-6.65 (m, 1H), 4.44 (d, *J* = 7.6, 1H), 3.85 (d, *J* = 7.9, 1H), 3.39 (s, 2H);  $^{13}C$  NMR (125 MHz,  $(CD_3)_2SO$ )  $\delta$  156.0, 148.7, 146.7, 139.5, 138.6, 128.6, 128.1, 127.8, 127.8, 127.4, 127.0, 126.6, 125.2, 123.7, 118.5, 115.0, 66.7, 63.4, 47.2; ESI-HRMS calcd for  $C_{27}H_{26}N_3O_5S^+ [M + H]^+$ : 504.1588, found 504.1587.

**L10:** Yellow solid;  $[\alpha]_D^{25} = +32.6$  (*c* 0.86,  $CH_2Cl_2$ );  $^1H$  NMR (500 MHz,  $CDCl_3$ )  $\delta$  7.96 (d, *J* = 8.2, 2H), 7.63 (d, *J* = 8.2, 2H), 7.23 (s, 1H), 7.18 (s, 3H), 7.02-6.90 (m, 5H), 6.70 (d, *J* = 7.2, 2H), 6.65 (s, 1H), 4.71 (d, *J* = 7.9, 1H), 3.89 (d, *J* = 7.9, 1H), 3.83 (d, *J* = 13.3, 1H), 3.56 (d, *J* = 13.3, 1H), 1.47 (s, 9H), 1.22 (s, 9H);  $^{13}C$  NMR (125 MHz,  $CDCl_3$ )  $\delta$  152.7, 148.4, 144.9, 140.0, 135.7, 135.3, 134.9, 127.6, 127.2, 127.2, 127.1, 127.0, 126.9, 126.5, 122.7, 122.3, 120.4, 65.2, 61.8, 49.8, 33.9, 33.1, 30.6, 28.6; ESI-HRMS calcd for  $C_{35}H_{42}N_3O_5S^+ [M + H]^+$ : 616.2840, found 616.2830.

### 3. Other optimizations of the Mannich reaction

**Table S1:** Metal effects.<sup>[a]</sup>

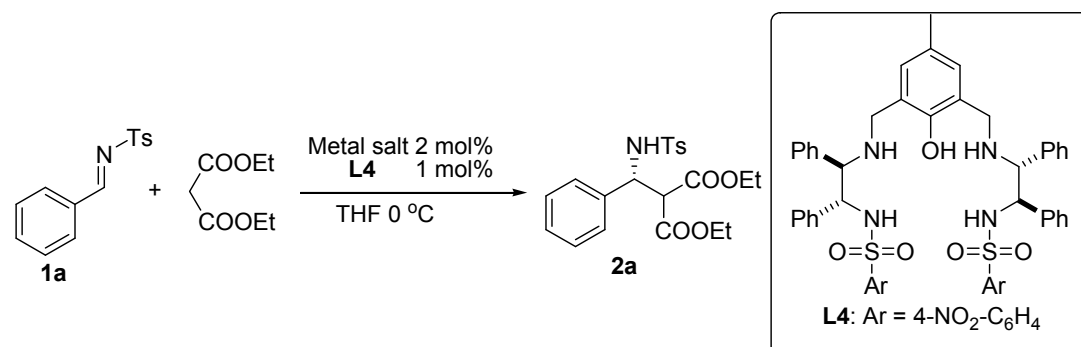

| Entry | Metal salt           | Yield <sup>[b]</sup> (%) | <i>ee</i> <sup>[c]</sup> (%) |
|-------|----------------------|--------------------------|------------------------------|
| 1     | Ni(OAc) <sub>2</sub> | 94                       | 96                           |
| 2     | Fe(OAc) <sub>2</sub> | 14                       | 1                            |
| 3     | Cu(OAc) <sub>2</sub> | 21                       | 5                            |
| 4     | Co(OAc) <sub>2</sub> | 38                       | 3                            |
| 5     | CuOAc                | 30                       | 3                            |
| 6     | Mn(OAc) <sub>2</sub> | 54                       | 1                            |
| 7     | Mn(OAc) <sub>3</sub> | 37                       | 3                            |
| 8     | Zn(OAc) <sub>2</sub> | 26                       | 13                           |

[a] Unless otherwise noted, all reactions were performed with metal salt (2 mol%) and ligand (1 mol%), **1a** (1.0 mmol), and diethyl malonate (1.0 mmol) in THF (5.0 mL) under air atmosphere at 0 °C for 16-17h. [b] Isolated yield. [c] Determined by HPLC analysis on a chiral stationary phase.

**Table S2:** Solvent effects.<sup>[a]</sup>

| Entry | Solvent                         | Yield <sup>[b]</sup> (%) | <i>ee</i> <sup>[c]</sup> (%) |
|-------|---------------------------------|--------------------------|------------------------------|
| 1     | THF                             | 94                       | 96                           |
| 2     | CH <sub>2</sub> Cl <sub>2</sub> | 10                       | 5                            |
| 3     | AcOEt                           | 56                       | 58                           |
| 4     | CH <sub>3</sub> OH              | 50                       | 14                           |
| 5     | Toluene                         | 6                        | 22                           |

[a] Unless otherwise noted, all reactions were performed with Ni(OAc)<sub>2</sub>·4H<sub>2</sub>O (2 mol%) and **L4** (1 mol%), **1a** (1.0 mmol), and diethyl malonate (1.0 mmol) in the specified solvent (5.0 mL) under air atmosphere at 0 °C for 16-17h. [b] Isolated yield. [c] Determined by HPLC analysis on a chiral stationary phase.

**Table S3:** The effects of concentration of imine.<sup>[a]</sup>

| Entry | The concentration of imine (M) | Yield <sup>[b]</sup> (%) | <i>ee</i> <sup>[c]</sup> (%) |
|-------|--------------------------------|--------------------------|------------------------------|
| 1     | 0.20                           | 94                       | 96                           |
| 2     | 0.25                           | 92                       | 97                           |
| 3     | 0.33                           | 88                       | 91                           |
| 4     | 0.50                           | 84                       | 90                           |
| 5     | 1.0                            | 89                       | 83                           |

[a] Unless otherwise noted, all reactions were performed with Ni(OAc)<sub>2</sub>·4H<sub>2</sub>O (2 mol%) and **L4** (1 mol%), **1a** (1.0 mmol), and diethyl malonate (1.0 mmol) in THF (5.0-1.0 mL) under air atmosphere at 0 °C for 16-17h. [b] Isolated yield. [c] Determined by HPLC analysis on a chiral stationary phase.

**Table S4:** The effects of the molar ratio of the imine / diethyl malonate.<sup>[a]</sup>

| Entry | The molar ratio of the imine / diethyl malonate. | Yield <sup>[b]</sup> (%) | <i>ee</i> <sup>[c]</sup> (%) |
|-------|--------------------------------------------------|--------------------------|------------------------------|
| 1     | 1:1                                              | 92                       | 97                           |
| 2     | 1:1.2                                            | 94                       | 97                           |
| 3     | 1:1.4                                            | 95                       | 96                           |

[a] Unless otherwise noted, all reactions were performed with Ni(OAc)<sub>2</sub>·4H<sub>2</sub>O (2 mol%) and **L4** (1 mol%), **1a** (1.0 mmol), and diethyl malonate (1.0-1.4 mmol) in THF (4.0 mL) under air atmosphere at 0 °C for 16-17h. [b] Isolated yield. [c] Determined by HPLC analysis on a chiral stationary phase.

**Table S5:** The effects of the reaction temperature.<sup>[a]</sup>

| Entry | T (°C). | Time (h) | Yield <sup>[b]</sup> (%) | <i>ee</i> <sup>[c]</sup> (%) |
|-------|---------|----------|--------------------------|------------------------------|
| 1     | 0       | 16       | 92                       | 97                           |
| 2     | -15     | 40       | 89                       | 89                           |

[a] Unless otherwise noted, all reactions were performed with Ni(OAc)<sub>2</sub>·4H<sub>2</sub>O (2 mol%) and **L4** (1 mol%), **1a** (1.0 mmol), and diethyl malonate (1.2 mmol) in THF (4.0 mL) under air atmosphere at 0 °C for 16-17h. [b] Isolated yield. [c] Determined by HPLC analysis on a chiral stationary phase.

**Table S6:** Additive effects.<sup>[a]</sup>

| Entry | Additive.                      | Yield <sup>[b]</sup> (%) | <i>ee</i> <sup>[c]</sup> (%) |
|-------|--------------------------------|--------------------------|------------------------------|
| 1     | none                           | 85                       | 96                           |
| 2     | 3Å MS (15.0 mg) <sup>[d]</sup> | 90                       | 95                           |

|   |                                  |    |    |
|---|----------------------------------|----|----|
| 3 | 4Å MS (15.0 mg) <sup>[d]</sup>   | 90 | 97 |
| 4 | 5Å MS (15.0 mg) <sup>[d]</sup>   | 92 | 95 |
| 5 | 4- <i>t</i> Bu-phenol (0.5 mol%) | 91 | 94 |

[a] The reaction was performed with Ni(OAc)<sub>2</sub>·4H<sub>2</sub>O (1 mol%) and **L4** (0.5 mol%), **1a** (2.0 mmol) and diethyl malonate (2.4 mmol) in THF (8.0 mL) under air atmosphere at 0 °C for 16-17h. [b] Isolated yield. [c] Determined by HPLC analysis on a chiral stationary phase. [d] 1.5 g/mmol, relative to the ligand.

#### 4. General procedure for the catalytic Mannich reaction

4.1 (5 mmol scale): The mixture of Ni(OAc)<sub>2</sub>·4H<sub>2</sub>O (0.01 mmol, 0.2 mol%), 4Å MS (7.5 mg) and **L4** (0.005 mmol, 0.1 mol%) was stirred in THF (15.0 mL) at 35 °C for 1.5 h. The mixture was cooled to 0 °C, then the imine **1** (5.0 mmol) and THF (3.0 mL) were added. After stirring for 30 min at 0 °C, diethyl malonate (6.0 mmol) and THF (2.0 mL) were added. The mixture continued to stir at 0 °C for the time indicated in Table 2. The resulting solution concentrated under reduced pressure and purified by column chromatography (petroleum ether / AcOEt, 5:1 to 8:1) on silica gel to afford the products.

4.2 (20 mmol scale): The mixture of Ni(OAc)<sub>2</sub>·4H<sub>2</sub>O (0.04 mmol, 0.2 mol%), 4Å MS (30 mg) and **L4** (0.02 mmol, 0.1 mol%) was stirred in THF (60 mL) at 35 °C for 1.5 h. The mixture was cooled to 0 °C, and then the imine **1h** (20.0 mmol) and THF (10.0 mL) were added. After stirring for 30 min at 0 °C, diethyl malonate (24.0 mmol) and THF (10.0 mL) were added. The mixture continued to stir at 0 °C for 24 h. The resulting solution was filtered through a short pad of silica gel (15 g) and washed with CH<sub>2</sub>Cl<sub>2</sub>, and the solution concentrated under reduced pressure. The crude product was recrystallized from petroleum ether and AcOEt to afford **2h**.

4.3 (50 mmol scale): The mixture of Ni(OAc)<sub>2</sub>·4H<sub>2</sub>O (0.1 mmol, 0.2 mol%), 4Å MS (75 mg) and **L4** (0.05 mmol, 0.1 mol%) was stirred in THF (160 mL) at 35 °C for 1.5 h. The mixture was cooled to 0 °C, and then the imine **1h** (50.0 mmol) and THF (20.0 mL) were added. After stirring for 30 min at 0 °C, diethyl malonate (60.0 mmol) and THF (20.0 mL) were added. The mixture continued to stir at 0 °C for 96 h. The reaction mixture was diluted by CH<sub>2</sub>Cl<sub>2</sub>/ petroleum ether (400 mL, 1:1, v/v) and filtered through a short pad of silica gel (70 g). The resulting solution was concentrated to 15-20 mL under reduced pressure, then petroleum ether (200 mL) was added to the residue with vigorous stirring to afford the crude product (97% *ee*). The crude product was recrystallized from petroleum ether and AcOEt to afford **2h**.

## 5. General procedure for the synthesis of azirdines<sup>[1]</sup>

To the solution of **2** (0.2 mmol) in anhydrous CH<sub>3</sub>CN (1.0 mL), PhI(OAc)<sub>2</sub> (0.4 mmol) and Bu<sub>4</sub>NBr (0.4 mmol) were added. The resulted mixture was warmed up and stirred at 30 °C for 30-40 min. The mixture directly purified by column chromatography (petroleum ether / AcOEt, 10:1 to 15:1) on silica gel to provide the corresponding aziridine.

---

[1] R. Fan, Y. Ye, *Adv. Synth. Catal.* **2008**, 350, 1526-1530.



## 6. Miscellaneous analyses of the complexes

### 6.1 ESI-MS analysis of the complexes

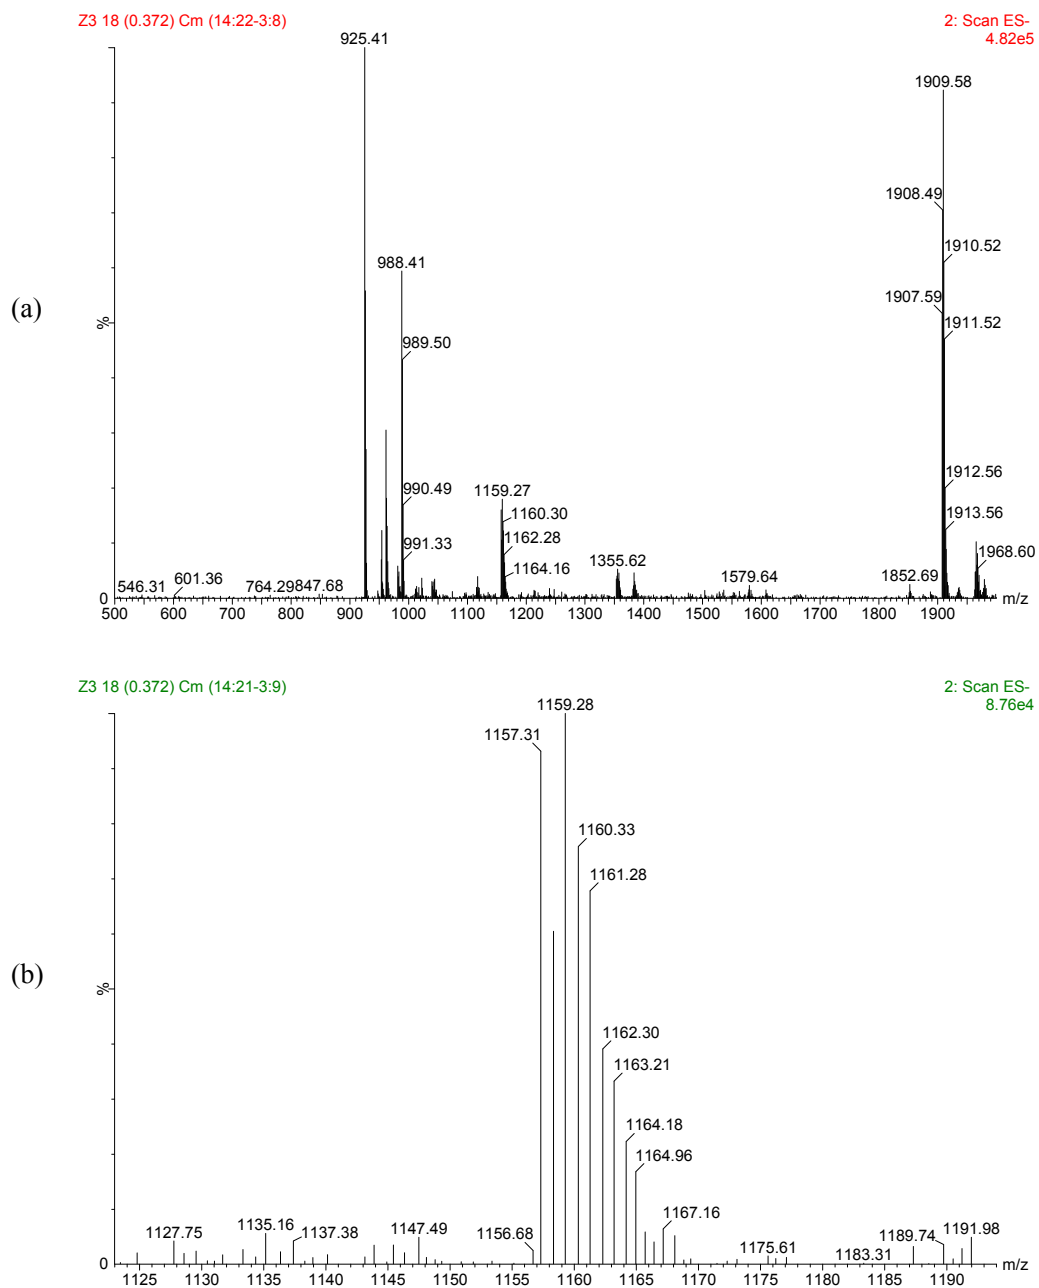

**Figure S1.** ESI-MS of  $Ni(OAc)_2/L4 = 1:1$  mixture generated in THF (a, b)

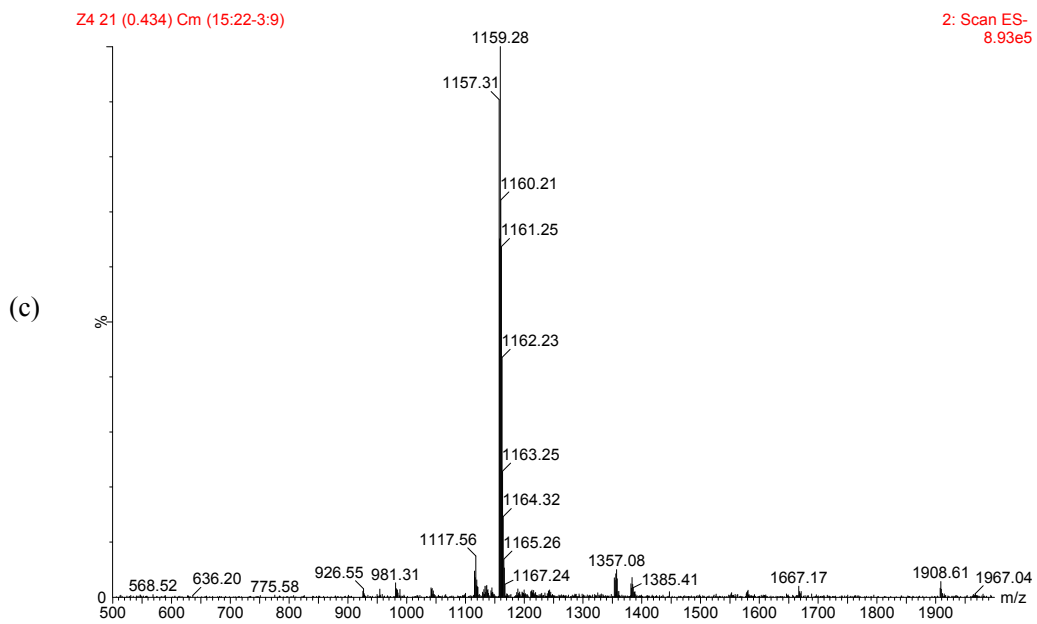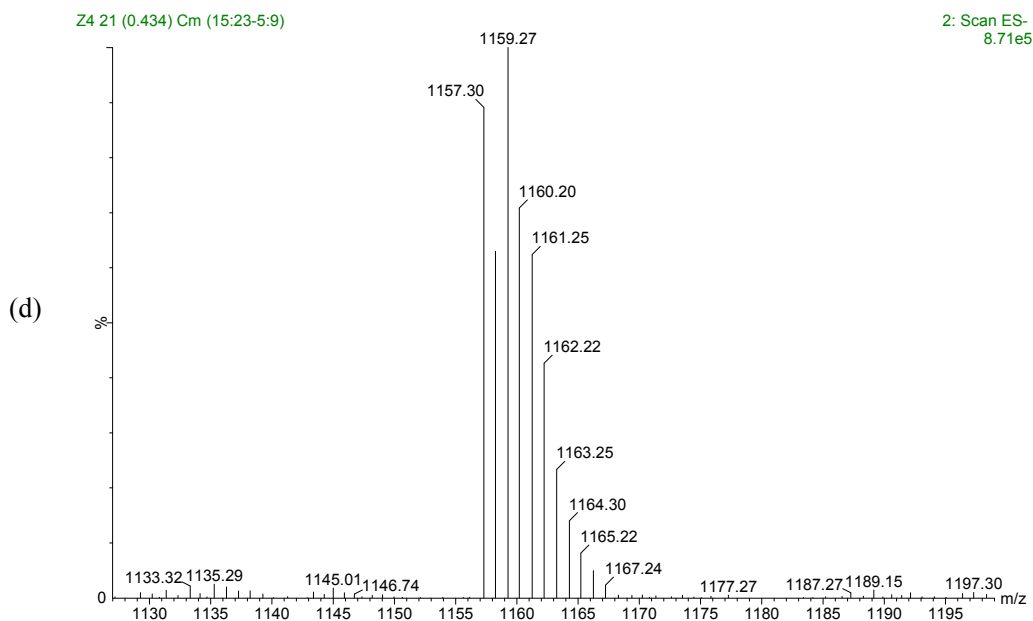

Calcd.  $C_{53}H_{49}N_6Ni_2O_{13}S_2$  [ $M_{L4} - 2H + Ni_2(OAc)_2 - H$ ] $^-$ : 1157.15

Found: 1157.30

**Figure S2.** ESI-MS of  $Ni(OAc)_2/L4 = 2:1$  mixture generated in THF (c, d)

## Mass Spectrum SmartFormula Report

|                      |                                    |                  |                       |
|----------------------|------------------------------------|------------------|-----------------------|
| <b>Analysis Info</b> |                                    | Acquisition Date | 11/24/2016 2:13:50 PM |
| Analysis Name        | D:\Data\201611\Z10-161124_000004.d | Operator         |                       |
| Method               | 4_17_Mass_range_pos_7T             | Instrument       | solariX               |
| Sample Name          | Z10-161124                         |                  |                       |
| Comment              |                                    |                  |                       |

|                              |            |                   |     |                       |                          |
|------------------------------|------------|-------------------|-----|-----------------------|--------------------------|
| <b>Acquisition Parameter</b> |            |                   |     |                       |                          |
| Polarity                     | Negative   | n/a               | n/a | No. of Laser Shots    | 200                      |
| n/a                          | n/a        | No. of Cell Fills | 1   | Laser Power           | 20.0 lp                  |
| Broadband Low Mass           | 100.4 m/z  | n/a               | n/a | n/a                   | n/a                      |
| Broadband High Mass          | 3000.0 m/z | n/a               | n/a | n/a                   | n/a                      |
| Acquisition Mode             | Single MS  | n/a               | n/a |                       |                          |
| Pulse Program                | basic      | n/a               | n/a | Calibration Date      | Thu Nov 17 02:55:09 2016 |
| Source Accumulation          | 0.010 sec  | n/a               | n/a | Data Acquisition Size | 1048576                  |
| Ion Accumulation Time        | 0.100 sec  | n/a               | n/a | Apodization           | Sine-Bell Multiplication |
| Flight Time to Acq. Cell     | 0.002 sec  |                   |     |                       |                          |

(e)

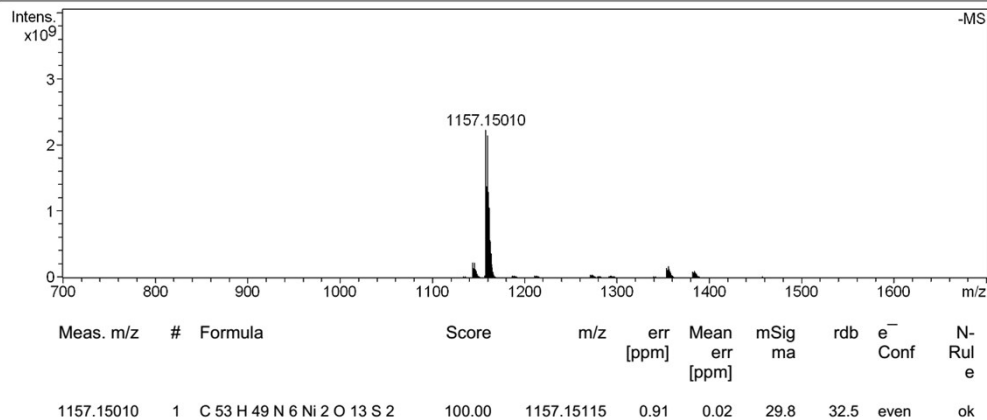

Calcd. C<sub>53</sub>H<sub>49</sub>N<sub>6</sub>Ni<sub>2</sub>O<sub>13</sub>S<sub>2</sub> [M<sub>L4</sub> -2H + Ni<sub>2</sub>(OAc)<sub>2</sub> -H]<sup>-</sup>: 1157.15115

Found: 1157.15010

**Figure S3.** ESI-HRMS of Ni(OAc)<sub>2</sub>/L4 = 2:1 mixture generated in THF (e)

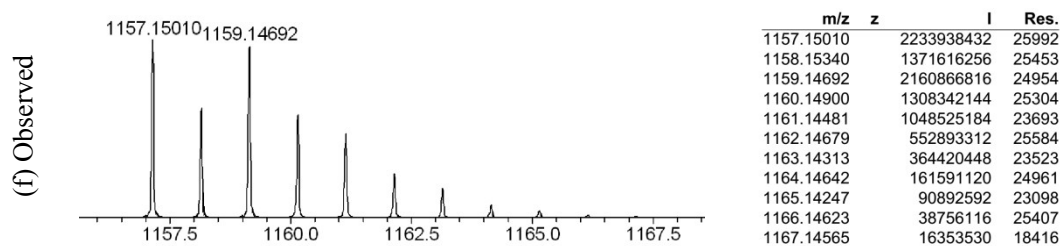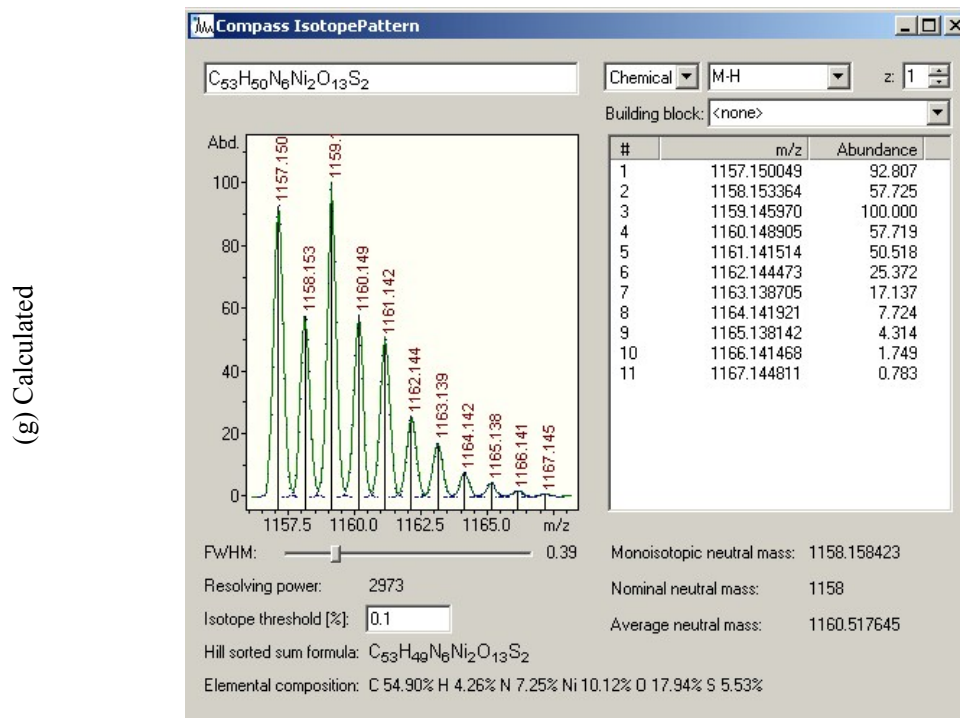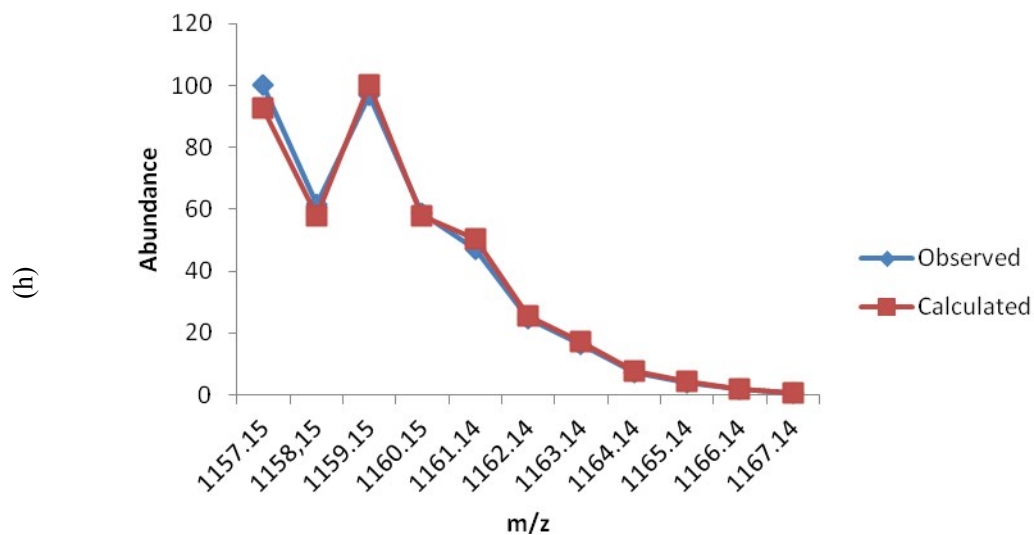

**Figure S4.** The observed distribution pattern of  $m/z$  1157 and the calculated distribution pattern of C53H49N6Ni2O13S2 (f, g, h)

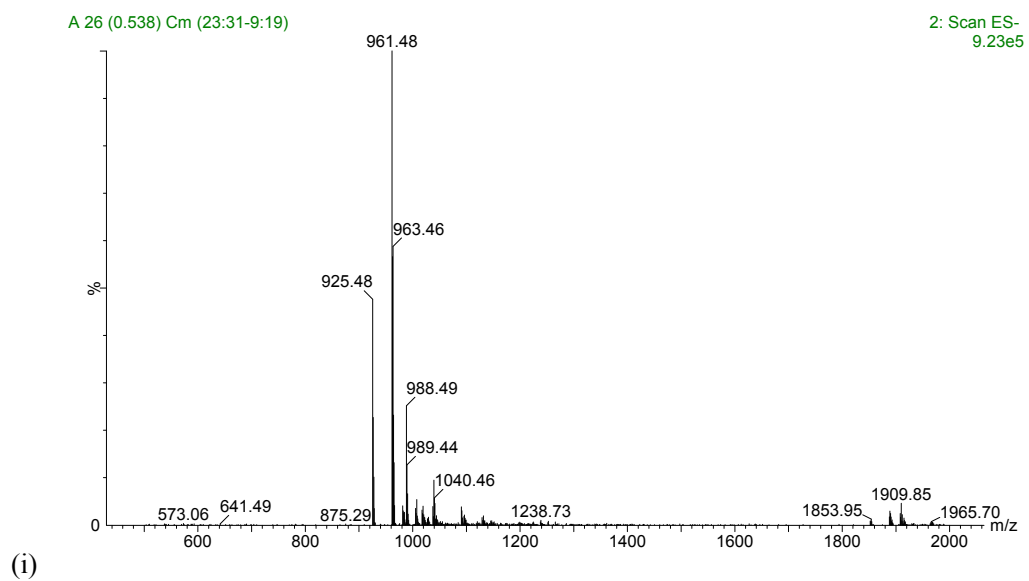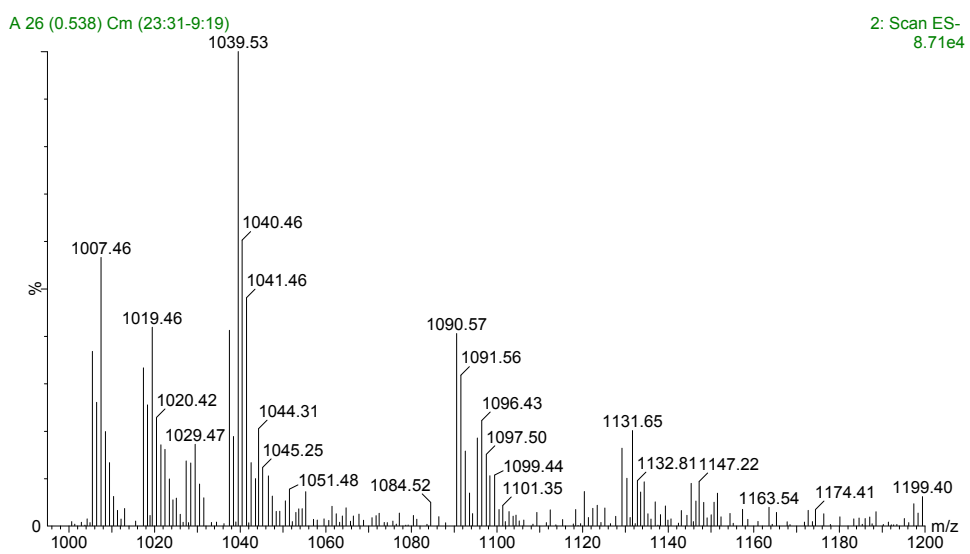

Figure S5. ESI-MS of Ni(OAc)<sub>2</sub>/L4 = 2:1 mixture generated in CH<sub>2</sub>Cl<sub>2</sub> (i)

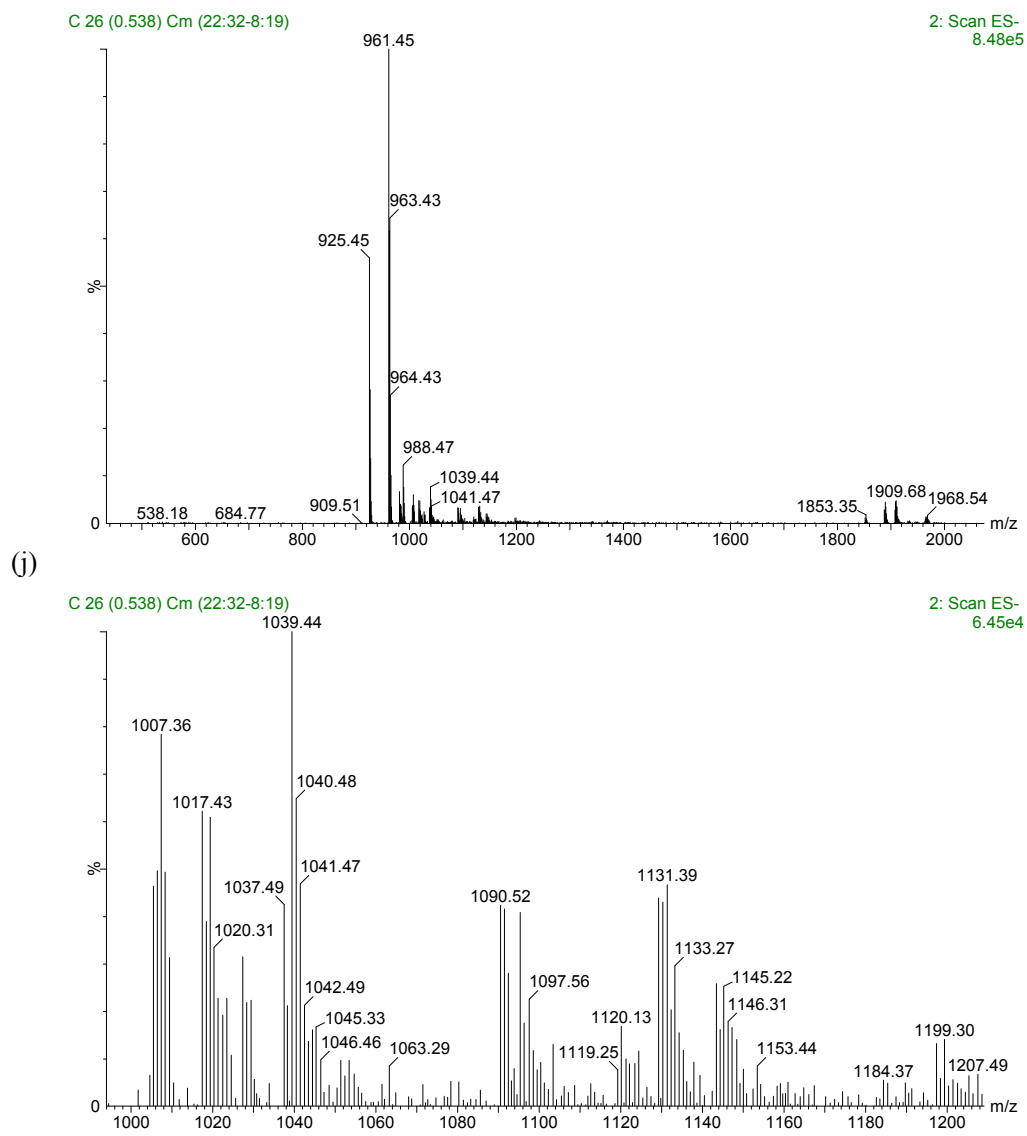

Figure S6. ESI-MS of Ni(OAc)<sub>2</sub>/L4 = 2:1 mixture generated in toluene (j)

## 6.2 The structure of the dinuclear Ni-aminophenol sulfonamide complex optimized by DFT

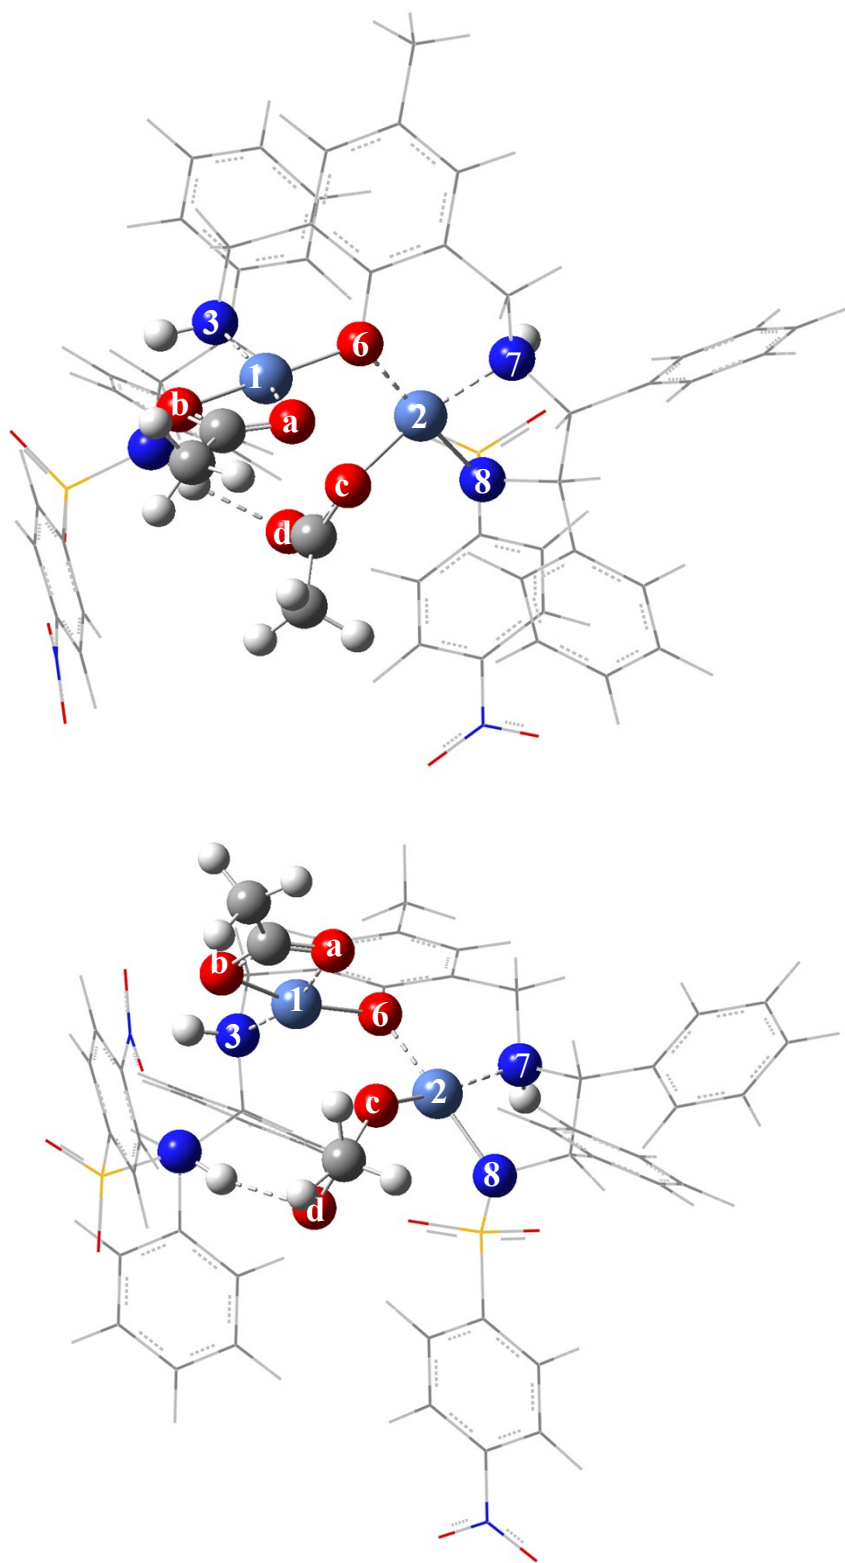

**Figure S7.** The geometry of Ni<sub>2</sub>/L<sub>4</sub> optimized by density functional theory (DFT)

**Computational Methods:** DFT calculations were carried out using the Gaussian 09 software package<sup>[2]</sup>. Considering both the desired precision of structures and available computer resources, the geometry optimizations were performed using the Becke's three-parameter nonlocal exchange function<sup>[3]</sup> and the Lee, Yang, and Parr nonlocal correlation function (LYP)<sup>[4]</sup> at a mixed basis set level. The Lan2DZ basis set<sup>[5]</sup> with the associated effective core potential was used for Ni, while the 6-31G(d) basis set<sup>[6]</sup> was used for all other atoms (C, H, O, N, S).

### 6.2.1 Selected bond length (nm)

| Ni <sub>1</sub> -N <sub>3</sub> | Ni <sub>1</sub> -O <sub>a</sub> | Ni <sub>1</sub> -O <sub>6</sub> | Ni <sub>2</sub> -O <sub>6</sub> | Ni <sub>2</sub> -N <sub>7</sub> | Ni <sub>2</sub> -N <sub>8</sub> | Ni <sub>2</sub> -O <sub>c</sub> | Ni <sub>1</sub> -O <sub>b</sub> | Ni <sub>1</sub> -Ni <sub>2</sub> |
|---------------------------------|---------------------------------|---------------------------------|---------------------------------|---------------------------------|---------------------------------|---------------------------------|---------------------------------|----------------------------------|
| 0.1962                          | 0.1955                          | 0.1878                          | 0.1932                          | 0.1948                          | 0.1917                          | 0.1893                          | 0.1916                          | 0.3185                           |

### 6.2.2 Selected dihedral angles (°)

| $\angle$ Ni <sub>1</sub> N <sub>3</sub> N <sub>4</sub> O <sub>5</sub> | $\angle$ N <sub>3</sub> N <sub>4</sub> O <sub>5</sub> O <sub>6</sub> | $\angle$ Ni <sub>2</sub> O <sub>6</sub> N <sub>7</sub> N <sub>8</sub> | $\angle$ O <sub>6</sub> N <sub>7</sub> N <sub>8</sub> O <sub>9</sub> | $\angle$ Ni <sub>1</sub> O <sub>6</sub> Ni <sub>2</sub> O <sub>9</sub> | $\angle$ N <sub>3</sub> N <sub>4</sub> O <sub>6</sub> O <sub>9</sub> | $\angle$ N <sub>3</sub> Ni <sub>1</sub> O <sub>6</sub> Ni <sub>2</sub> |
|-----------------------------------------------------------------------|----------------------------------------------------------------------|-----------------------------------------------------------------------|----------------------------------------------------------------------|------------------------------------------------------------------------|----------------------------------------------------------------------|------------------------------------------------------------------------|
| 123.71                                                                | -13.90                                                               | 4.11                                                                  | 68.74                                                                | 91.42                                                                  | -121.54                                                              | -107.89                                                                |

[2] M. J. Frisch, G. W. , H. B. Schlegel, G. E. Scuseria, M. A. Robb, J. R. Cheeseman, G. Scalmani, V. Barone, B. Mennucci, G. A. Petersson, H. Nakatsuji, M. Caricato, X. Li, H. P. Hratchian, A. F. Izmaylov, J. Bloino, G. Zheng, J. L. Sonnenberg, M. Hada, M. Ehara, K. Toyota, R. Fukuda, J. Hasegawa, M. Ishida, T. Nakajima, Y. Honda, O. Kitao, H. Nakai, T. Vreven, J. A. Montgomery, Jr., J. E. Peralta, F. Ogliaro, M. Bearpark, J. J. Heyd, E. Brothers, K. N. Kudin, V. N. Staroverov, R. Kobayashi, J. Normand, K. Raghavachari, A. Rendell, J. C. Burant, S. S. Iyengar, J. Tomasi, M. Cossi, N. Rega, J. M. Millam, M. Klene, J. E. Knox, J. B. Cross, V. Bakken, C. Adamo, J. Jaramillo, R. Gomperts, R. E. Stratmann, O. Yazyev, A. J. Austin, R. Cammi, C. Pomelli, J. W. Ochterski, R. L. Martin, K. Morokuma, V. G. Zakrzewski, G. A. Voth, P. Salvador, J. J. Dannenberg, S. Dapprich, A. D. Daniels, Ö. Farkas, J. B. Foresman, J. V. Ortiz, J. Cioslowski, and D. J. Fox. Gaussian 09, revision D.01; Gaussian, Inc.: Wallingford, CT, 2009.

[3] W. Kohn, A. D. Becke, R. G. Parr, *J. Phys. Chem.* **1996**, *100*, 12974-12980.

[4] C. Lee, W. Yang, R. G. Parr, *Phys. Rev. B* **1988**, *37*, 785.

[5] (a) P. J. Hay, W. R. Wadt, *J. Chem. Phys.* **1985**, *82*, 270-283. (b) W. R. Wadt, P. J. Hay, *J. Chem. Phys.* **1985**, *82*, 284-298. (c) P. J. Hay, W. R. Wadt, *J. Chem. Phys.* **1985**, *82*, 299-310.

[6] P. C. Hariharan, J. A. Pople, *Theoretica. Chimica. Acta.* **1973**, *28*, 213-222.



## 7. The X-ray data for 2k

Crystal data for **2k**:  $C_{21}H_{24}BrNO_6S$ ,  $M = 498.38$ ,  $a = 9.7594(11) \text{ \AA}$ ,  $b = 12.6345(14) \text{ \AA}$ ,  $c = 17.835(2) \text{ \AA}$ ,  $\alpha = 90^\circ$ ,  $\beta = 90^\circ$ ,  $\gamma = 90^\circ$ ,  $V = 2199.1(4) \text{ \AA}^3$ ,  $T = 100(2) \text{ K}$ , space group  $P212121$ ,  $Z = 4$ ,  $\mu(\text{MoK}\alpha) = 2.001 \text{ mm}^{-1}$ , 24629 reflections measured, 6517 independent reflections ( $R_{int} = 0.0415$ ). The final  $R_1$  values were 0.0446 ( $I > 2\sigma(I)$ ). The final  $wR(F^2)$  values were 0.1001 ( $I > 2\sigma(I)$ ). The final  $R_1$  values were 0.0596 (all data). The final  $wR(F^2)$  values were 0.1059 (all data). The goodness of fit on  $F^2$  was 1.072. Flack parameter = 0.020(4).

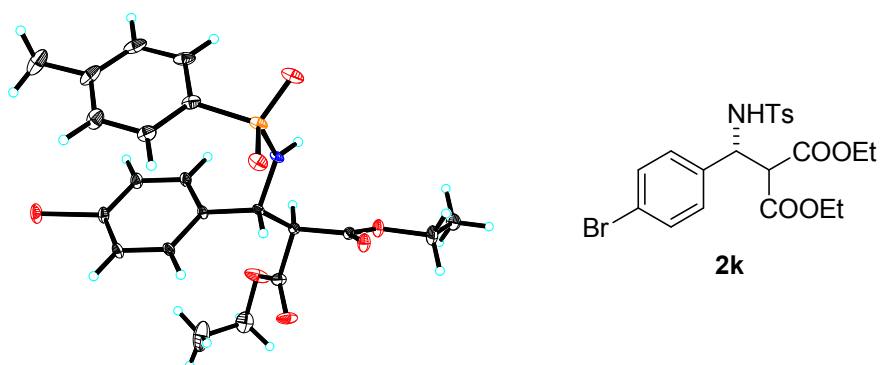

**Figure S8.** View of a molecule of **2k** with the atom-labeling scheme. Displacement ellipsoids are drawn at the 30% probability level.

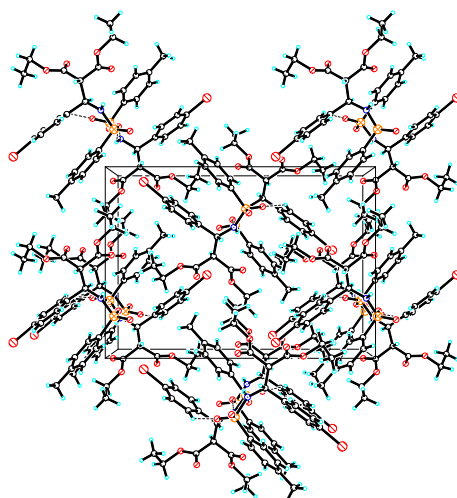

**Figure S7.** View of the pack drawing of **2k**. Hydrogen-bonds are shown as dashed

lines.

## 8. Postulated working model

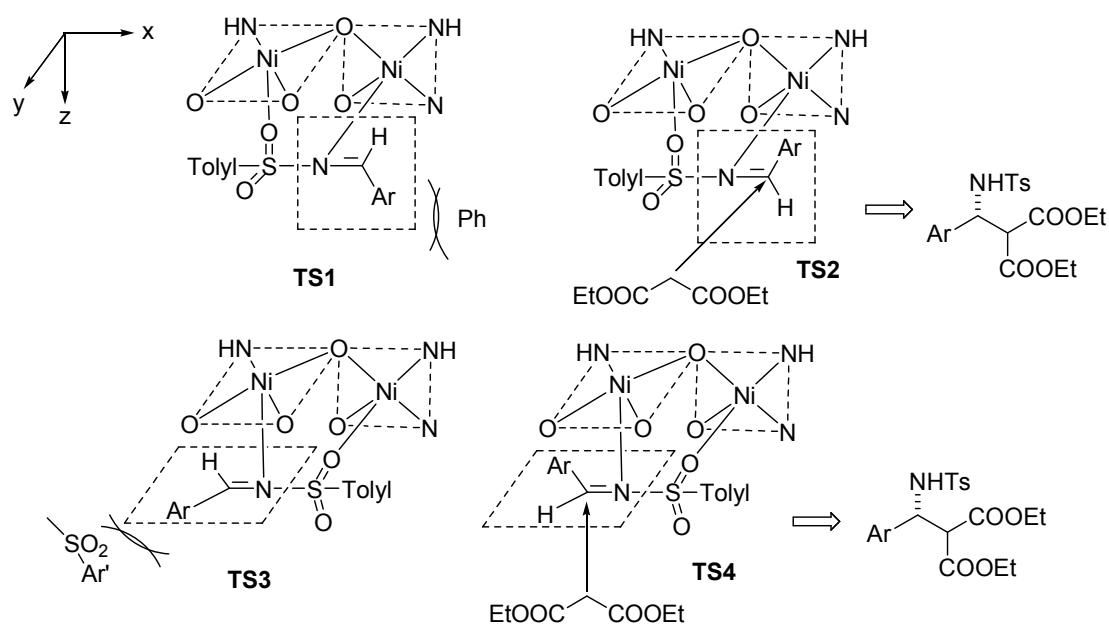

**Figure S8.** The proposed working model

Based on the geometry of Ni<sub>2</sub>/L<sub>4</sub> optimized by DFT and the absolute configuration of the products, four plausible transition states **TS1-4** (Figure S8) were proposed to elucidate the asymmetric induction. **TS2** and **TS4** were speculated to be more favorable than **TS1** or **TS3** due to the steric repulsion between Ar and the complex, affording (*R*)-**2**.

## 9. Characterization of products

The absolute configuration of **2k** was determined by X-ray crystallographic analysis. The absolute configuration of **2a-2j**, **2l-2n** was determined by analogy.

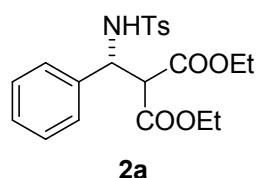

**2a:** White solid; 1.975 g, 94% yield, 96% *ee*;  $[\alpha]_{\text{D}}^{25} = +29.6$  (*c* 0.69, CH<sub>2</sub>Cl<sub>2</sub>); <sup>1</sup>H NMR (500 MHz, CDCl<sub>3</sub>)  $\delta$  7.49 (d, *J* = 7.7, 2H), 7.10 (s, 5H), 7.04 (d, *J* = 7.7, 2H), 6.43 (d, *J* = 9.5, 1H), 5.16-5.13 (m, 1H), 4.15-3.95 (m, 4H), 3.76 (d, *J* = 5.6, 1H), 2.29 (s, 3H), 1.17-1.11 (m, 6H); <sup>13</sup>C NMR (125 MHz, CDCl<sub>3</sub>)  $\delta$  166.7, 165.4, 144.9, 136.8, 136.5, 128.1,

127.3, 126.7, 125.9, 125.7, 61.1, 60.9, 56.9, 56.0, 20.4, 12.8, 12.8; The *ee* was determined by HPLC analysis using a CHIRALPAK IA column, hexane/2-propanol 85/15, flow rate = 1.0 mL/min, 220 nm,  $t_{\text{r}}$  = 24.15 min (minor) and  $t_{\text{r}}$  = 26.05 min (major); ESI-HRMS Calcd for C<sub>21</sub>H<sub>25</sub>NNaO<sub>6</sub>S<sup>+</sup>[M + Na]<sup>+</sup>: 442.1295, found 442.1293.

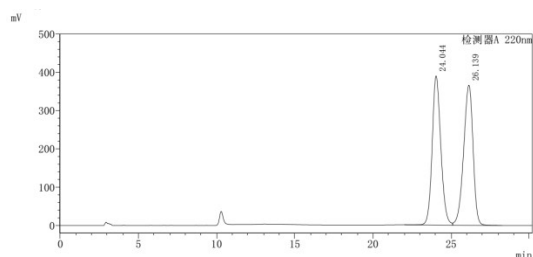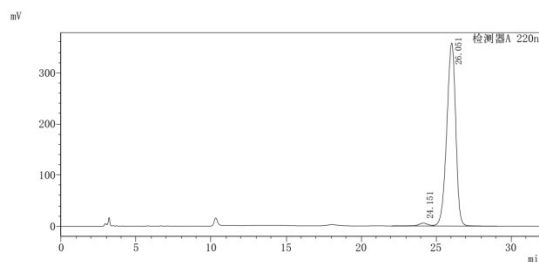

| Peak# | Ret Time | Area     | Height | Area%  |
|-------|----------|----------|--------|--------|
| 1     | 24.151   | 258267   | 5580   | 1.709  |
| 2     | 26.051   | 14852579 | 357985 | 98.291 |

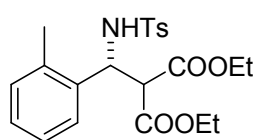

**2b**

**2b:** White solid; 2.121 g, 98% yield, 96% *ee*;  $[\alpha]_D^{25} = +22.9$  (c 0.87,  $\text{CH}_2\text{Cl}_2$ );  $^1\text{H NMR}$  (500 MHz,  $\text{CDCl}_3$ )  $\delta$  7.42 (d,  $J = 7.9$ , 2H), 7.01-6.97 (m, 5H), 6.87 (t,  $J = 7.2$ , 1H), 6.48 (d,  $J = 9.1$ , 1H), 5.39-5.36 (m, 1H), 4.17-4.02 (m, 4H), 3.67 (d,  $J = 5.5$ , 1H), 2.33 (s, 3H), 2.28 (s, 3H), 1.19-1.12 (m, 6H);  $^{13}\text{C NMR}$  (125 MHz,  $\text{CDCl}_3$ )  $\delta$  167.9, 166.5, 142.9, 137.9, 135.6, 134.9, 130.5, 129.1, 127.7, 126.8, 126.5, 126.1, 62.2, 62.0, 56.4, 53.3, 21.4, 19.1, 13.9, 13.9; The *ee* was determined by HPLC analysis using a CHIRALPAK IA column, hexane/2-propanol 70/30, flow rate = 1.0 mL/min, 220 nm,  $t_r = 12.66$  min (minor) and  $t_r = 13.84$  min (major); ESI-HRMS Calcd for  $\text{C}_{22}\text{H}_{27}\text{NNaO}_6\text{S}^+ [\text{M} + \text{Na}]^+$ : 456.1451, found 456.1451.

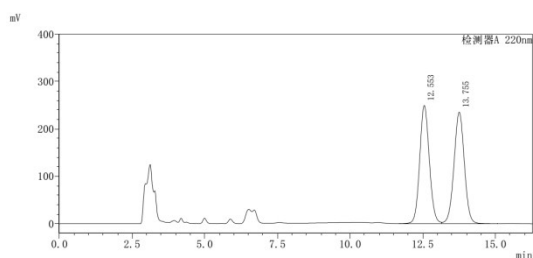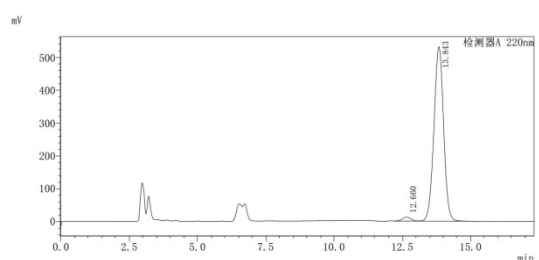

| Peak# | Ret Time | Area     | Height | Area%  |
|-------|----------|----------|--------|--------|
| 1     | 12.660   | 258372   | 12112  | 1.927  |
| 2     | 13.843   | 13148502 | 533570 | 98.073 |

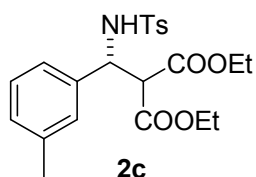

**2c**

**2c:** White solid; 2.152 g, 99% yield, 96% *ee*;  $[\alpha]_D^{25} = +26.7$  (c 0.60,  $\text{CH}_2\text{Cl}_2$ );  $^1\text{H NMR}$  (500 MHz,  $\text{CDCl}_3$ )  $\delta$  7.48 (d,  $J = 8.0$ , 2H), 7.06-7.00 (m, 3H), 6.92-6.90 (m, 2H), 6.79 (s, 1H), 6.33 (d,  $J = 9.5$ , 1H), 5.13-5.09

(m, 1H), 4.13-4.03 (m, 4H), 3.75 (d,  $J = 5.5$ , 1H), 2.31 (s, 3H), 2.14 (s, 3H), 1.20-1.12 (m, 6H);  $^{13}\text{C}$  NMR (125 MHz,  $\text{CDCl}_3$ )  $\delta$  166.8, 165.4, 141.8, 136.9, 136.8, 136.3, 128.0, 127.4, 127.2, 126.4, 126.0, 122.8, 61.1, 60.8, 56.8, 56.0, 20.3, 20.2, 12.9, 12.8; The *ee* was determined by HPLC analysis using a CHIRALPAK IA column, hexane/2-propanol 80/20, flow rate = 1.0 mL/min, 220 nm,  $t_r = 14.99$  min (minor) and  $t_r = 16.49$  min (major); ESI-HRMS Calcd for  $\text{C}_{22}\text{H}_{27}\text{NNaO}_6\text{S}^+ [\text{M} + \text{Na}]^+$ : 456.1451, found 456.1462.

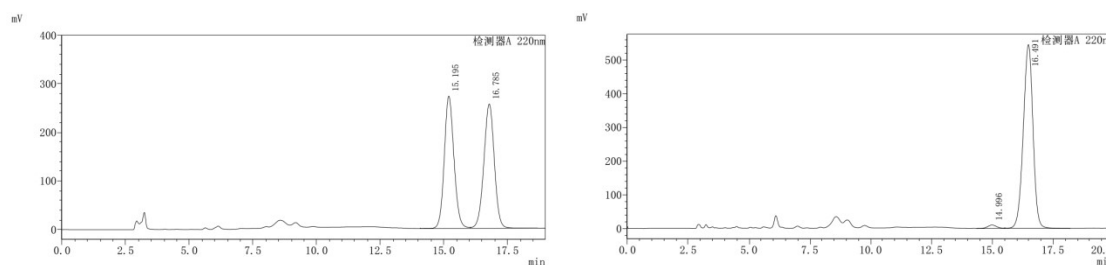

| Peak# | Ret Time | Area     | Height | Area%  |
|-------|----------|----------|--------|--------|
| 1     | 14.996   | 256329   | 9941   | 1.662  |
| 2     | 16.491   | 15167245 | 545335 | 98.338 |

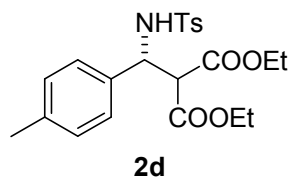

**2d**: White solid; 1.949 g, 90% yield, 96% *ee*;  $[\alpha]_D^{25} = +36.0$  ( $c$  0.70,  $\text{CH}_2\text{Cl}_2$ );  $^1\text{H}$  NMR (500 MHz,  $\text{CDCl}_3$ )  $\delta$  7.49 (d,  $J = 7.7$ , 2H), 7.05 (d,  $J = 7.7$ , 2H), 6.97 (d,  $J = 7.5$ , 2H), 6.91 (d,  $J = 7.6$ , 2H), 6.35 (d,  $J = 9.4$ , 1H), 5.09 (t,  $J = 7.4$ , 1H), 4.14-3.96 (m, 4H), 3.74 (d,  $J = 5.6$ , 1H), 2.31(s, 3H), 2.23 (s, 3H), 1.15 (m, 6.53, 6H);  $^{13}\text{C}$  NMR (125 MHz,  $\text{CDCl}_3$ )  $\delta$  166.1, 164.8, 141.1, 136.2, 135.7, 132.9, 127.4, 127.3, 125.3, 125.0, 60.4, 60.2, 56.2, 55.1, 19.7, 19.3, 12.2, 12.2; The *ee* was determined by HPLC analysis using a CHIRALPAK IA column, hexane/2-propanol 80/20, flow rate = 1.0 mL/min, 220 nm,  $t_r = 23.02$  min (minor) and  $t_r = 27.06$  min (major); ESI-HRMS Calcd for  $\text{C}_{22}\text{H}_{27}\text{NNaO}_6\text{S}^+ [\text{M} + \text{Na}]^+$ : 456.1451, found 456.1443.

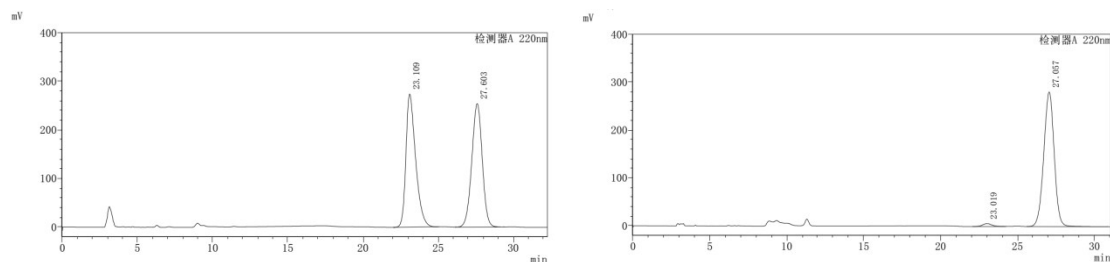

| Peak# | Ret Time | Area | Height | Area% |
|-------|----------|------|--------|-------|
|-------|----------|------|--------|-------|

|   |        |          |        |        |
|---|--------|----------|--------|--------|
| 1 | 23.019 | 254068   | 6054   | 1.878  |
| 2 | 27.057 | 13271744 | 281134 | 98.122 |

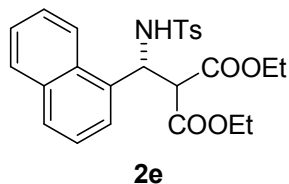

**2e:** White solid; 2.280 g, 97% yield, 90% *ee*;  $[\alpha]_D^{25} = -12.9$  (*c* 0.86, CH<sub>2</sub>Cl<sub>2</sub>); <sup>1</sup>H NMR (500 MHz, CDCl<sub>3</sub>) δ 8.04 (d, *J* = 8.5, 1H), 7.74 (d, *J* = 8.1, 1H), 7.59 (d, *J* = 8.2, 1H), 7.51 (t, *J* = 7.5, 1H), 7.42 (t, *J* = 7.4, 1H), 7.38 (d, *J* = 8.0, 2H), 7.33 (d, *J* = 7.2, 1H), 7.15 (t, *J* = 7.7, 1H), 6.94 (d, *J* = 9.5, 1H), 6.80 (d, *J* = 4.7, 2H), 6.06-6.02 (m, 1H), 4.13-4.01 (m, 4H), 4.0-3.94 (m, 1H), 2.15 (s, 3H), 1.13 (t, *J* = 7.1, 3H), 1.05 (t, *J* = 7.1, 3H); <sup>13</sup>C NMR (125 MHz, CDCl<sub>3</sub>) δ 167.9, 166.7, 142.8, 137.7, 133.6, 132.9, 130.0, 129.0, 128.9, 128.5, 126.9, 126.8, 125.8, 125.0, 125.0, 122.0, 62.3, 61.9, 56.8, 53.1, 21.3, 13.9, 13.9; The *ee* was determined by HPLC analysis using a CHIRALPAK IA column, hexane/2-propanol 70/30, flow rate = 1.0 mL/min, 220 nm, *t*<sub>r</sub> = 15.64 min (major) and *t*<sub>r</sub> = 18.93 min (minor); ESI-HRMS Calcd for C<sub>25</sub>H<sub>27</sub>NNaO<sub>6</sub>S<sup>+</sup> [M + Na]<sup>+</sup>: 492.1451, found 492.1457.

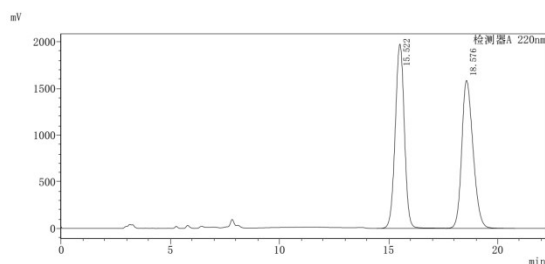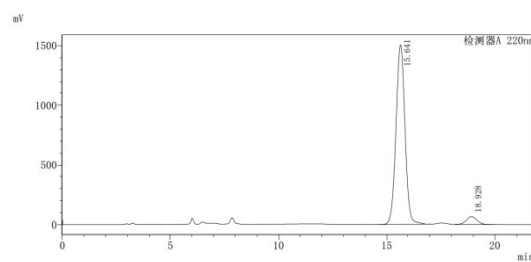

| Peak# | Ret Time | Area     | Height  | Area%  |
|-------|----------|----------|---------|--------|
| 1     | 15.641   | 43542497 | 1504971 | 95.126 |
| 2     | 18.928   | 2231239  | 65718   | 4.874  |

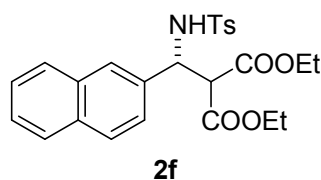

**2f:** White solid; 2.210 g, 94% yield, 97% *ee*;  $[\alpha]_D^{25} = +56.3$  (*c* 1.26, CH<sub>2</sub>Cl<sub>2</sub>); <sup>1</sup>H NMR (500 MHz, CDCl<sub>3</sub>) δ 7.73-7.72 (m, 1H), 7.62-7.59 (m, 2H), 7.47-7.41 (m, 5H), 7.24 (d, *J* = 8.5, 1H), 6.86 (d, *J* = 7.8, 2H), 6.53 (d, *J* = 9.5, 1H), 5.34-5.31 (m, 1H), 4.16-4.01 (m, 4H), 3.89 (d, *J* = 5.5, 1H), 2.09 (s, 3H), 1.18 (t, *J* = 7.1, 3H), 1.12 (t, *J* = 7.1, 3H); <sup>13</sup>C NMR (125 MHz, CDCl<sub>3</sub>) δ 166.8, 165.4, 141.9, 136.7, 133.5, 131.8, 131.6, 128.0, 127.2, 126.9, 126.4, 125.9, 125.4, 125.2, 125.1, 123.2, 61.2, 60.9, 56.7, 56.2, 20.1, 12.9, 12.8; The *ee* was determined by HPLC analysis using a CHIRALPAK IA column, hexane/2-propanol 80/20, flow rate = 1.0 mL/min, 220 nm, *t*<sub>r</sub> = 24.85 min (minor) and *t*<sub>r</sub> = 27.15 min (major); ESI-HRMS Calcd for C<sub>25</sub>H<sub>27</sub>NNaO<sub>6</sub>S<sup>+</sup> [M + Na]<sup>+</sup>: 492.1451, found 492.1439.

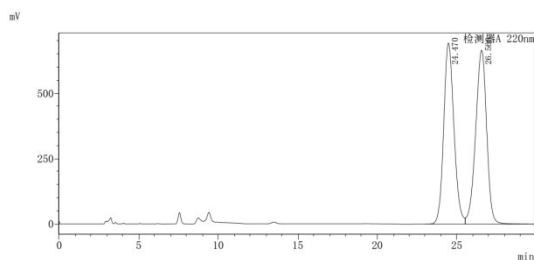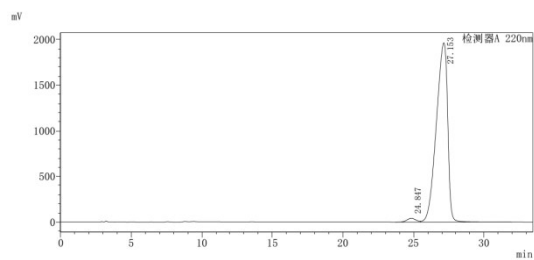

| Peak# | Ret Time | Area      | Height  | Area%  |
|-------|----------|-----------|---------|--------|
| 1     | 24.847   | 1849960   | 41045   | 1.658  |
| 2     | 27.153   | 109699000 | 1966771 | 98.342 |

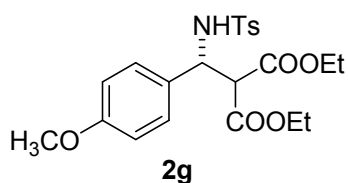

**2g:** White solid; 1.798 g, 80% yield, 95% *ee*;  $[\alpha]_D^{25} = +35.9$  (*c* 0.74,  $\text{CH}_2\text{Cl}_2$ );  $^1\text{H NMR}$  (500 MHz,  $\text{CDCl}_3$ )  $\delta$  7.45 (d,  $J = 7.9$ , 2H), 7.02 (d,  $J = 7.85$ , 2H), 6.98 (d,  $J = 8.2$ , 2H), 6.58 (d,  $J = 8.3$ , 2H), 6.37 (d,  $J = 9.4$ , 1H), 5.07-5.04 (m, 1H), 4.13-3.95 (m, 4H), 3.74 (d,  $J = 6.6$ , 1H), 3.66 (s, 3H), 2.27 (s, 3H), 1.15-1.08 (m, 6H);  $^{13}\text{C NMR}$  (125 MHz,  $\text{CDCl}_3$ )  $\delta$  165.6, 164.3, 157.0, 140.7, 135.9, 127.6, 127.1, 126.1, 125.0, 111.6, 59.9, 59.8, 56.1, 54.6, 53.1, 19.3, 11.8, 11.8; The *ee* was determined by HPLC analysis using a CHIRALPAK AD-H column, hexane/2-propanol 70/30, flow rate = 1.0 mL/min, 220 nm,  $t_r = 22.34$  min (minor) and  $t_r = 26.30$  min (major); ESI-HRMS Calcd for  $\text{C}_{22}\text{H}_{27}\text{NNaO}_7\text{S}^+ [\text{M} + \text{Na}]^+$ : 472.1400, found 472.1394.

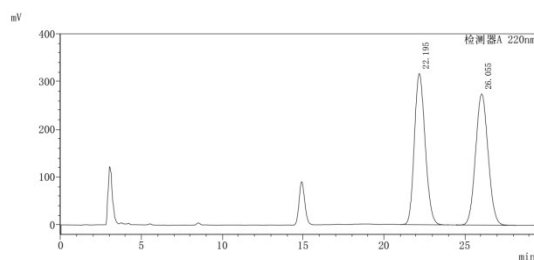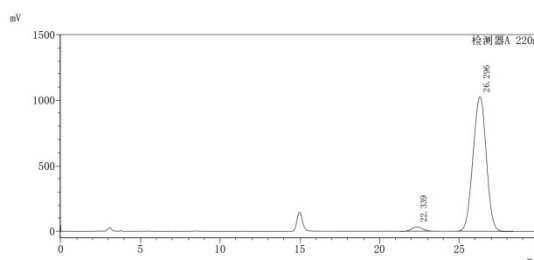

| Peak# | Ret Time | Area     | Height  | Area%  |
|-------|----------|----------|---------|--------|
| 1     | 22.339   | 1533253  | 32876   | 2.518  |
| 2     | 26.296   | 59360076 | 1025443 | 97.482 |

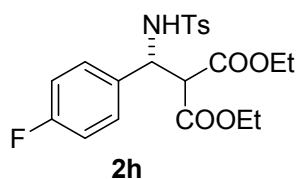

**2h:** White solid; 2.106 g, 96% yield, 97% *ee*;  $[\alpha]_D^{25} = +22.6$  (*c* 0.59,  $\text{CH}_2\text{Cl}_2$ );  $^1\text{H NMR}$  (500 MHz,  $\text{CDCl}_3$ )  $\delta$  7.48 (d,  $J = 7.9$ , 2H), 7.10-7.06 (m, 4H), 6.78 (t,  $J = 8.4$ , 2H), 6.45 (d,  $J = 9.3$ , 1H), 5.12-5.09 (m,

1H), 4.16-3.95 (m, 4H), 3.73 (d,  $J = 6.2$ , 1H), 2.31 (s, 3H), 1.14 (m, 6H);  $^{13}\text{C}$  NMR (125 MHz,  $\text{CDCl}_3$ )  $\delta$  166.6, 165.2, 161.1 (d,  $J = 245.4$ ), 142.1, 136.7, 132.4 (d,  $J = 3.0$ ), 128.2, 127.7, 127.7, 126.0, 114.2, 114.1, 61.1, 61.0, 56.9, 55.4, 20.4, 12.8; The *ee* was determined by HPLC analysis using a CHIRALPAK IA column, hexane/2-propanol 70/30, flow rate = 1.0 mL/min, 220 nm,  $t_r = 16.67$  min (minor) and  $t_r = 19.39$  min (major); ESI-HRMS Calcd for  $\text{C}_{21}\text{H}_{24}\text{FNNaO}_6\text{S}^+ [\text{M} + \text{Na}]^+$ : 460.1201, found 460.1208.

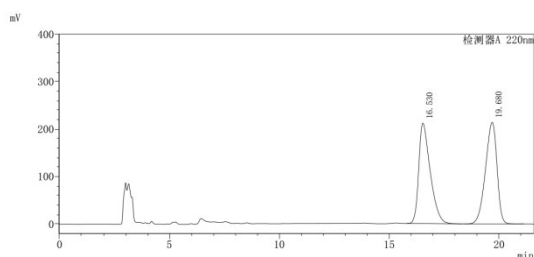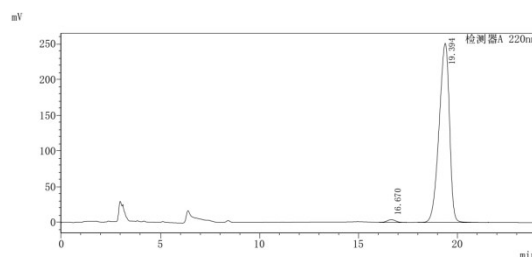

| Peak# | Ret Time | Area    | Height | Area%  |
|-------|----------|---------|--------|--------|
| 1     | 16.670   | 114236  | 3887   | 1.235  |
| 2     | 19.394   | 9132991 | 250877 | 98.765 |

**2h**: White solid; 99% *ee*,  $[\alpha]_{\text{D}}^{25} = +24.5$  ( $c$  0.40,  $\text{CH}_2\text{Cl}_2$ ); The *ee* was determined by HPLC analysis using a CHIRALPAK IA column, hexane/2-propanol 70/30, flow rate = 1.0 mL/min, 220 nm,  $t_r = 12.75$  min (minor) and  $t_r = 15.40$  min (major).

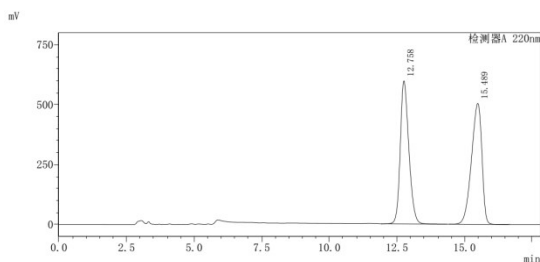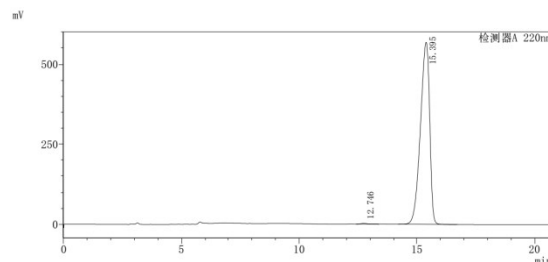

| Peak# | Ret Time | Area     | Height | Area%  |
|-------|----------|----------|--------|--------|
| 1     | 12.746   | 40628    | 2047   | 0.260  |
| 2     | 15.395   | 15556490 | 569147 | 99.740 |

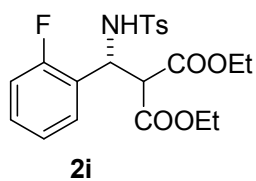

**2i**: White solid; 2.078 g, 95% yield, 91% *ee*;  $[\alpha]_{\text{D}}^{25} = +21.6$  ( $c$  2.20,  $\text{CH}_2\text{Cl}_2$ );  $^1\text{H}$  NMR (500 MHz,  $\text{CDCl}_3$ )  $\delta$  7.50 (d,  $J = 7.8$ , 2H), 7.12-7.09 (m, 2H), 7.03 (d,  $J = 7.8$ , 2H), 6.86-6.80 (m, 2H), 6.27 (d,  $J = 9.9$ , 1H), 5.36-5.33 (m, 1H), 4.14-3.90 (m, 4H), 3.84 (d,  $J = 6.5$ , 1H), 2.26 (s, 3H), 1.14-1.08 (m, 6H);  $^{13}\text{C}$  NMR (125 MHz,  $\text{CDCl}_3$ )  $\delta$  166.3, 165.1, 158.7 (d,  $J = 244.6$ ), 142.1, 136.6,

128.6 (d,  $J = 8.4$ ), 128.2, 128.1 (d,  $J = 3.4$ ), 126.0, 123.7 (d,  $J = 12.6$ ), 123.0 (d,  $J = 3.2$ ), 114.3 (d,  $J = 21.4$ ), 61.1, 60.9, 55.4, 50.9, 20.3, 12.8, 12.8 ppm. The *ee* was determined by HPLC analysis using a CHIRALPAK IA column, hexane/2-propanol 70/30, flow rate = 1.0 mL/min, 220 nm,  $t_r = 13.54$  min (major) and  $t_r = 15.74$  min (minor); ESI-HRMS Calcd for  $C_{21}H_{24}FNNaO_6S^+ [M + Na]^+$ : 460.1201, found 460.1209.

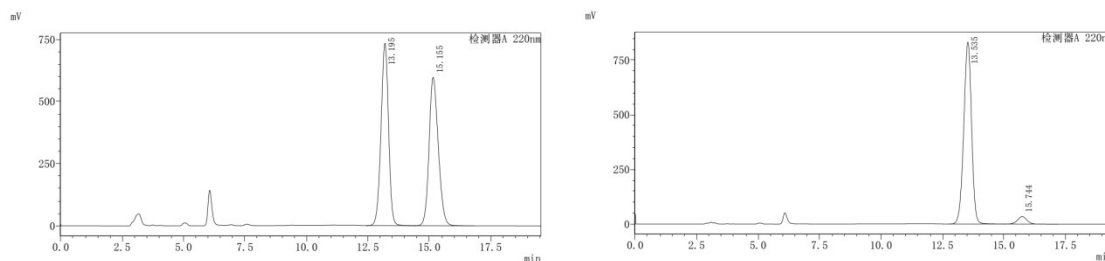

| Peak# | Ret Time | Area     | Height | Area%  |
|-------|----------|----------|--------|--------|
| 1     | 13.535   | 18435529 | 832944 | 95.356 |
| 2     | 15.744   | 897783   | 34437  | 4.644  |

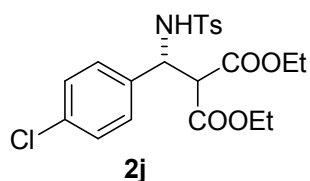

**2j**: White solid; 2.256 g, 99% yield, 95% *ee*;  $[\alpha]_D^{25} = +29.8$  ( $c$  0.88,  $CH_2Cl_2$ );  $^1H$  NMR (500 MHz,  $CDCl_3$ )  $\delta$  7.46 (d,  $J = 8.0$ , 2H), 7.06-7.03 (m, 6H), 6.48 (d,  $J = 9.4$ , 1H), 5.10-5.07 (m, 1H), 4.16-3.94 (m, 4H), 3.74 (d,  $J = 6.4$ , 1H), 2.31 (s, 3H), 1.13 (m, 6H);  $^{13}C$  NMR (125 MHz,  $CDCl_3$ )  $\delta$  166.4, 165.2, 142.2, 136.7, 135.2, 132.6, 128.2, 127.5, 127.4, 126.0, 61.1, 61.1, 56.7, 55.5, 20.4, 12.8; The *ee* was determined by HPLC analysis using a CHIRALPAK IA column, hexane/2-propanol 70/30, flow rate = 1.0 mL/min, 220 nm,  $t_r = 19.28$  min (minor) and  $t_r = 23.99$  min (major); ESI-HRMS Calcd for  $C_{21}H_{24}ClNNaO_6S^+ [M + Na]^+$ : 476.0905, found 476.0927.

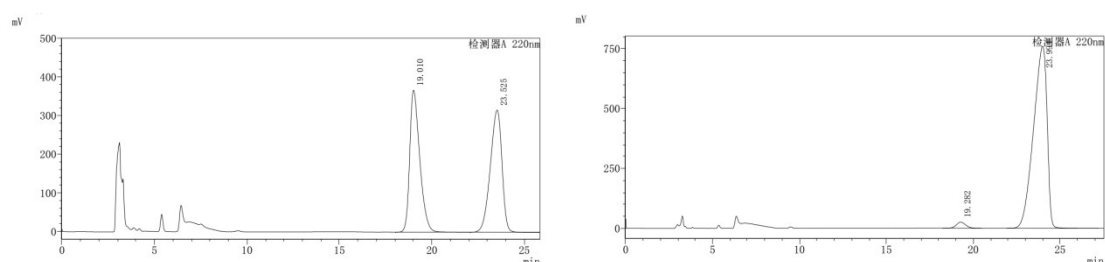

| Peak# | Ret Time | Area     | Height | Area%  |
|-------|----------|----------|--------|--------|
| 1     | 19.282   | 943038   | 25240  | 2.230  |
| 2     | 23.994   | 41341347 | 760197 | 97.770 |



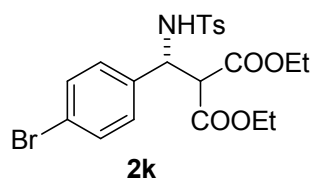

**2k:** White solid; 2.400 g, 96% yield, 93% *ee*;  $[\alpha]_D^{25} = +27.0$  (c 0.99,  $\text{CH}_2\text{Cl}_2$ );  $^1\text{H NMR}$  (500 MHz,  $\text{CDCl}_3$ )  $\delta$  7.47 (d,  $J = 7.9$ , 2H), 7.22 (d,  $J = 8.2$ , 2H), 7.07 (d,  $J = 7.9$ , 2H), 6.98 (d,  $J = 8.2$ , 2H), 6.43 (d,  $J = 9.4$ , 1H), 5.10-5.06 (m, 1H), 4.18-3.97 (m, 4H), 3.72 (d,  $J = 5.8$ , 1H), 2.34 (s, 3H), 1.16 (m, 6H);  $^{13}\text{C NMR}$  (125 MHz,  $\text{CDCl}_3$ )  $\delta$  167.6, 166.2, 143.3, 137.7, 136.7, 131.5, 129.3, 128.8, 127.0, 121.9, 62.3, 62.1, 57.6, 56.6, 21.5, 13.9, 13.9; The *ee* was determined by HPLC analysis using a CHIRALPAK IA column, hexane/2-propanol 70/30, flow rate = 1.0 mL/min, 220 nm,  $t_r = 17.52$  min (minor) and  $t_r = 21.18$  min (major); ESI-HRMS Calcd for  $\text{C}_{21}\text{H}_{24}\text{BrNNaO}_6\text{S}^+ [\text{M} + \text{Na}]^+$ : 520.0400, found 520.0393.

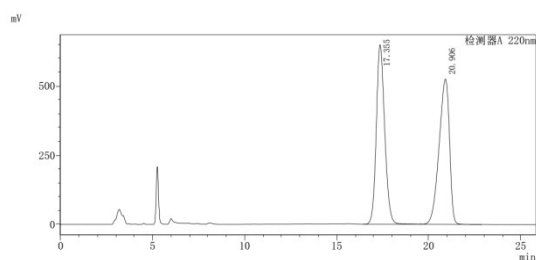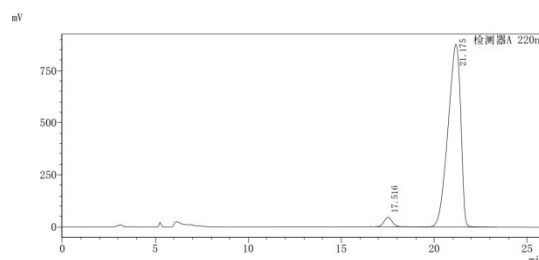

| Peak# | Ret Time | Area     | Height | Area%  |
|-------|----------|----------|--------|--------|
| 1     | 17.516   | 1467603  | 45375  | 3.414  |
| 2     | 21.175   | 41520285 | 876707 | 96.586 |

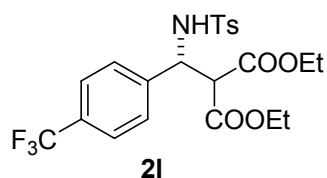

**2l:** White solid; 2.386 g, 98% yield, 90% *ee*;  $[\alpha]_D^{25} = +14.6$  (c 3.80,  $\text{CH}_2\text{Cl}_2$ );  $^1\text{H NMR}$  (500 MHz,  $\text{CDCl}_3$ )  $\delta$  7.44 (d,  $J = 7.6$ , 2H), 7.33 (d,  $J = 7.7$ , 2H), 7.22 (d,  $J = 7.7$ , 2H), 7.01 (d,  $J = 7.7$ , 2H), 6.57 (d,  $J = 9.5$ , 1H), 5.20-5.17 (m, 1H), 4.19-3.98 (m, 4H), 3.77 (d,  $J = 5.7$ , 1H), 2.28 (s, 3H), 1.15 (m, 6H);  $^{13}\text{C NMR}$  (125 MHz,  $\text{CDCl}_3$ )  $\delta$  166.4, 165.1, 142.3, 140.5, 136.5, 128.2, 126.6, 125.9, 124.2 (d,  $J = 3.7$ ), 61.3, 61.2, 56.5, 55.7, 20.2, 12.8, 12.8; The *ee* was determined by HPLC analysis using a CHIRALPAK IA column, hexane/2-propanol 80/20, flow rate = 1.0 mL/min, 220 nm,  $t_r = 21.70$  min (minor) and  $t_r = 23.77$  min (major); ESI-HRMS Calcd for  $\text{C}_{22}\text{H}_{24}\text{F}_3\text{NNaO}_6\text{S}^+ [\text{M} + \text{Na}]^+$ : 510.1167, found 510.1164.

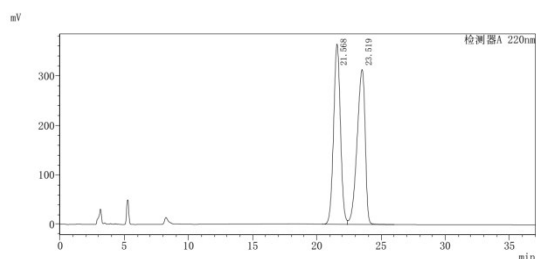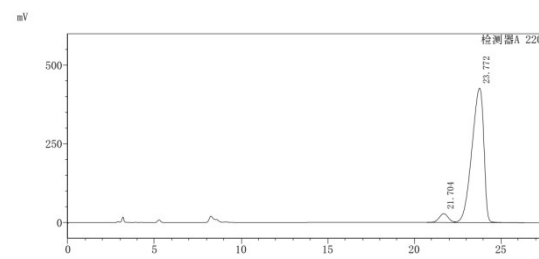

| Peak# | Ret Time | Area     | Height | Area%  |
|-------|----------|----------|--------|--------|
| 1     | 21.704   | 1043607  | 28276  | 4.859  |
| 2     | 23.772   | 20433254 | 427576 | 95.141 |

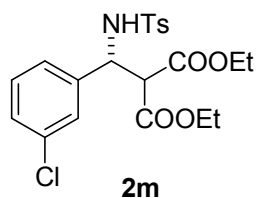

**2m:** White solid; 2.220 g, 98% yield, 90% *ee*;  $[\alpha]_D^{25} = +28.3$  (*c* 3.30, CH<sub>2</sub>Cl<sub>2</sub>); <sup>1</sup>H NMR (500 MHz, CDCl<sub>3</sub>)  $\delta$  7.48 (d, *J* = 7.6, 2H), 7.08-7.04 (m, 5H), 6.96 (s, 1H), 6.42 (d, *J* = 9.3, 1H), 5.12-5.09 (m, 1H), 4.18-4.00 (m, 4H), 3.73 (d, *J* = 4.5, 1H), 2.32 (s, 3H), 1.20-1.14 (m, 6H); <sup>13</sup>C NMR (125 MHz, CDCl<sub>3</sub>)  $\delta$  167.6, 166.2, 143.3, 139.5, 137.6, 134.3, 129.7, 129.3, 128.0, 127.2, 127.0, 125.2, 62.4, 62.2, 57.6, 56.6, 21.5, 13.9, 13.9; The *ee* was determined by HPLC analysis using a CHIRALPAK IA column, hexane/2-propanol 70/30, flow rate = 1.0 mL/min, 220 nm, *t<sub>r</sub>* = 9.10 min (minor) and *t<sub>r</sub>* = 10.54 min (major); ESI-HRMS Calcd for C<sub>21</sub>H<sub>24</sub>ClNNaO<sub>6</sub>S<sup>+</sup> [M + Na]<sup>+</sup>: 476.0905, found 476.0907.

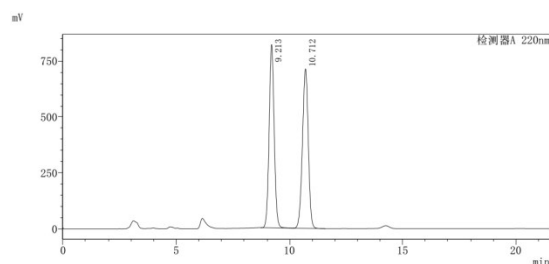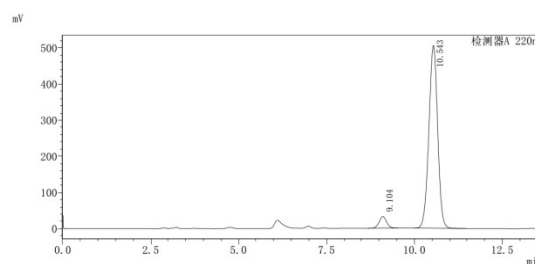

| Peak# | Ret Time | Area    | Height | Area%  |
|-------|----------|---------|--------|--------|
| 1     | 9.104    | 475704  | 31994  | 5.135  |
| 2     | 10.543   | 8787826 | 505583 | 94.865 |

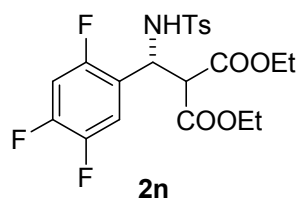

**2n:** White solid; 2.180 g, 92% yield, 92% *ee*;  $[\alpha]_D^{25} = +16.8$  (*c* 2.00, CH<sub>2</sub>Cl<sub>2</sub>); <sup>1</sup>H NMR (500 MHz, CDCl<sub>3</sub>)  $\delta$  7.54 (d, *J* = 8.0, 2H), 7.12 (d, *J* = 7.9, 2H), 7.00-6.94 (m, 1H), 6.78-6.72 (m, 1H), 6.36 (d, *J* = 9.7, 1H), 5.30-5.26 (m, 1H), 4.18-3.95 (m, 4H), 3.79 (d, *J* = 6.3, 1H), 2.32 (s, 3H), 1.16 (m, 6H); <sup>13</sup>C NMR (125 MHz, CDCl<sub>3</sub>)  $\delta$  166.2, 164.9, 142.6, 136.4, 128.3, 125.9, 116.4 (d, *J* = 4.8), 116.2 (d, *J* = 4.9), 104.6, 104.4 (d, *J* = 6.7), 104.3, 61.3, 61.2, 55.0, 49.9, 20.3, 12.8; The *ee* was determined by HPLC analysis using a CHIRALPAK IA column, hexane/2-propanol 70/30, flow rate = 1.0 mL/min, 220 nm, *t<sub>r</sub>* = 8.98 min (minor) and *t<sub>r</sub>* = 13.04 min (major); ESI-HRMS Calcd for C<sub>21</sub>H<sub>22</sub>F<sub>3</sub>NNaO<sub>6</sub>S<sup>+</sup> [M + Na]<sup>+</sup>: 496.1012, found 496.1003.

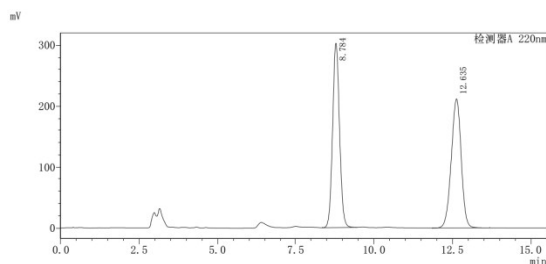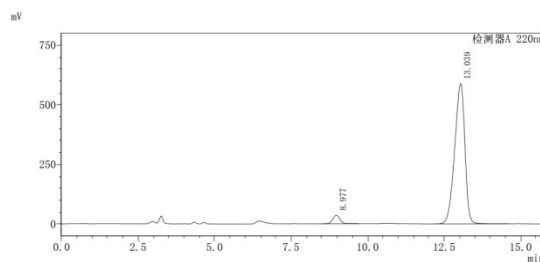

| Peak# | Ret Time | Area     | Height | Area%  |
|-------|----------|----------|--------|--------|
| 1     | 8.977    | 564297   | 35655  | 3.973  |
| 2     | 13.039   | 13639619 | 587321 | 96.027 |

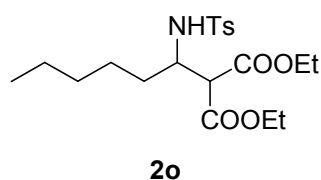

**2o**: White solid; 70.0 mg, 85% yield, 80% *ee*;  $[\alpha]_D^{25} = -18.7$  (*c* 0.46,  $\text{CH}_2\text{Cl}_2$ );  $^1\text{H NMR}$  (600 MHz,  $\text{CDCl}_3$ )  $\delta$  7.70 (d,  $J = 8.2$ , 2H), 7.24 (d,  $J = 7.9$ , 2H), 5.52 (d,  $J = 9.8$ , 1H), 4.17-4.13 (m, 2H), 4.04-4.00 (m, 1H), 3.96-3.92 (m, 1H), 3.84-3.80 (m, 1H), 3.53 (d,  $J = 4.0$ , 1H), 2.37 (s, 3H), 1.55-1.49 (m, 1H), 1.47-1.41 (m, 1H), 1.25-1.20 (m, 5H), 1.16 (t,  $J = 7.1$ , 3H), 1.13-1.05 (m, 4H); 0.76 (t,  $J = 7.0$ , 3H);  $^{13}\text{C NMR}$  (150 MHz,  $\text{CDCl}_3$ )  $\delta$  168.0, 167.4, 143.1, 138.5, 129.4, 126.9, 61.7, 61.6, 54.8, 53.5, 33.6, 31.1, 25.6, 22.3, 21.4, 13.9, 13.9, 13.8; The *ee* was determined by HPLC analysis using a CHIRALPAK IA column, hexane/2-propanol 85/15, flow rate = 1.0 mL/min, 220 nm,  $t_r = 9.23$  min (minor) and  $t_r = 11.59$  min (major); ESI-HRMS Calcd for  $\text{C}_{20}\text{H}_{31}\text{NNaO}_6\text{S}^+ [\text{M} + \text{Na}]^+$ : 436.1764, found 436.1761.

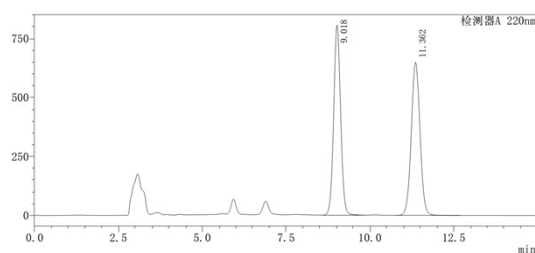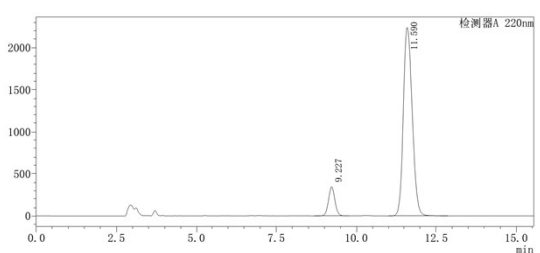

| Peak# | Ret Time | Area     | Height  | Area%  |
|-------|----------|----------|---------|--------|
| 1     | 9.227    | 4814832  | 346798  | 9.973  |
| 2     | 11.590   | 43461534 | 2239275 | 90.027 |

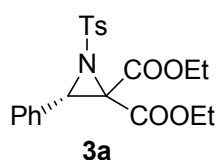

**3a**: Colorless oil; 78.0 mg, 93% yield, 93% *ee*;  $[\alpha]_D^{25} = -4.6$  (*c* 1.15,  $\text{CH}_2\text{Cl}_2$ );  $^1\text{H NMR}$  (500 MHz,  $(\text{CD}_3)_2\text{SO}$ )  $\delta$  7.93 (d,  $J = 7.9$ , 2H), 7.46 (d,  $J = 7.8$ , 2H), 7.29-7.24 (m, 5H), 4.91 (s, 1H), 4.32-4.31 (m, 2H), 3.91-3.90 (m, 2H), 2.39

(s, 3H), 1.27 (t,  $J = 6.8$ , 3H), 0.78 (t,  $J = 6.8$ , 3H); The *ee* was determined by HPLC analysis using a Chiralcel OD-H column, hexane/2-propanol 90/10, flow rate = 1.0 mL/min, 220 nm,  $t_r = 8.28$  min (minor) and  $t_r = 8.81$  min (major).

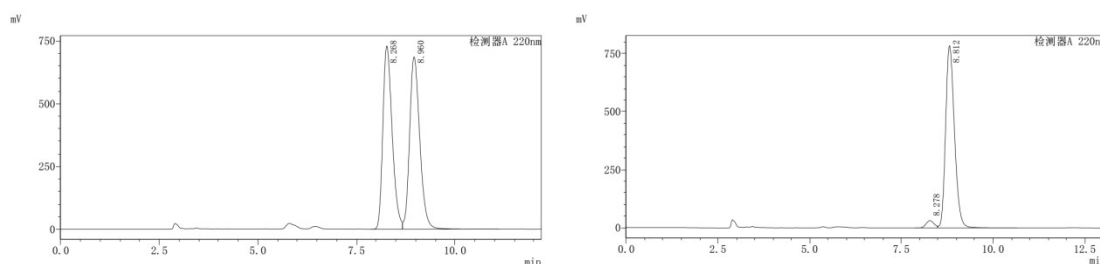

| Peak# | Ret Time | Area     | Height | Area%  |
|-------|----------|----------|--------|--------|
| 1     | 8.278    | 480569   | 31430  | 3.514  |
| 2     | 8.812    | 13194858 | 784859 | 96.486 |

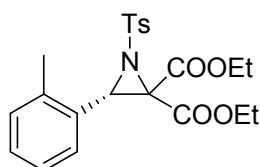

**3b**

**3b:** White solid; 77.7 mg, 90% yield, 94% *ee*;  $[\alpha]_D^{25} = +12.3$  ( $c$  0.90  $\text{CH}_2\text{Cl}_2$ );  $^1\text{H NMR}$  (500 MHz,  $(\text{CD}_3)_2\text{SO}$ )  $\delta$  7.96 (d,  $J = 8.3$ , 2H), 7.50 (d,  $J = 8.1$ , 2H), 7.21-7.15 (m, 2H), 7.04 (t,  $J = 7.1$ , 1H), 6.89 (d,  $J = 7.7$ , 1H), 4.83 (s, 1H), 4.31 (q,  $J = 7.0$ , 2H), 3.83 (q,  $J = 7.1$ , 2H), 2.41 (s, 3H), 2.38 (s, 3H), 1.26 (t,  $J = 7.1$ , 3H), 0.67 (t,  $J = 7.1$ , 3H) ppm. The *ee* was determined by HPLC analysis using a CHIRALPAK IA column, hexane/2-propanol 90/10, flow rate = 1.0 mL/min, 220 nm,  $t_r = 8.63$  min (major) and  $t_r = 9.69$  min (minor).

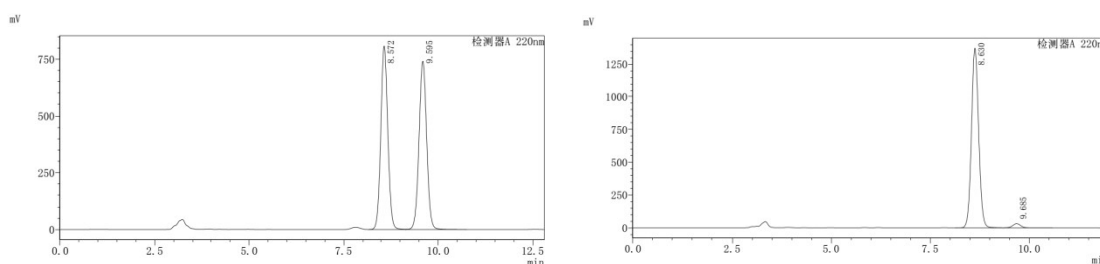

| Peak# | Ret Time | Area     | Height  | Area%  |
|-------|----------|----------|---------|--------|
| 1     | 8.630    | 17354728 | 1370731 | 97.358 |
| 2     | 9.685    | 470904   | 32411   | 2.642  |

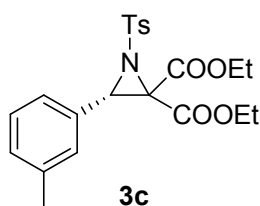

**3c**

**3c:** Colorless oil; 78.5 mg, 91% yield, 92% *ee*;  $[\alpha]_D^{25} = -5.4$  ( $c$  0.94,  $\text{CH}_2\text{Cl}_2$ );  $^1\text{H NMR}$  (500 MHz,  $(\text{CD}_3)_2\text{SO}$ )  $\delta$  7.92 (d,  $J = 7.7$ , 2H), 7.47 (d,  $J = 7.7$ , 2H), 7.20-6.99 (m, 4H), 4.83 (s, 1H), 4.31-4.29 (m, 2H), 3.94-

3.92 (m, 2H), 2.40 (s, 3H), 2.21 (s, 3H), 1.26 (t,  $J = 6.7$ , 3H), 0.80 (t,  $J = 6.7$ , 3H); The *ee* was determined by HPLC analysis using a CHIRALPAK IA column, hexane/2-propanol 90/10, flow rate = 1.0 mL/min, 220 nm,  $t_r = 9.98$  min (minor) and  $t_r = 13.01$  min (major).

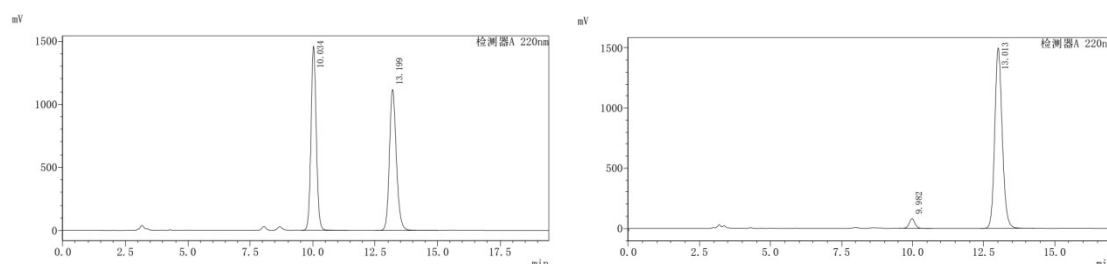

| Peak# | Ret Time | Area     | Height  | Area%  |
|-------|----------|----------|---------|--------|
| 1     | 9.982    | 1127719  | 80616   | 3.934  |
| 2     | 13.013   | 27540963 | 1500012 | 96.066 |

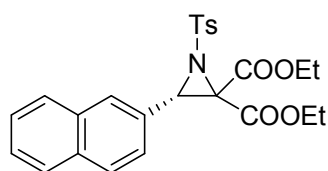

**3f**

**3f:** Colorless oil; 87.9 mg, 94% yield, 90% *ee*;  $[\alpha]_D^{25} = -4.8$  (c 0.66,  $\text{CH}_2\text{Cl}_2$ );  $^1\text{H NMR}$  (500 MHz,  $(\text{CD}_3)_2\text{SO}$ )  $\delta$  7.98 (d,  $J = 8.3$ , 2H), 7.87-7.82 (m, 4H), 7.51-7.47 (m, 4H), 7.34-7.32 (m, 1H), 5.07 (s, 1H), 4.39-4.28 (m, 2H), 3.93-3.81 (m, 2H), 2.38 (s, 3H), 1.28 (t,  $J = 7.1$ , 3H), 0.71 (t,  $J = 7.1$ , 3H); The *ee* was determined by HPLC analysis using a Chiralcel OD-H column, hexane/2-propanol 90/10, flow rate = 1.0 mL/min, 220 nm,  $t_r = 10.17$  min (minor) and  $t_r = 11.20$  min (major).

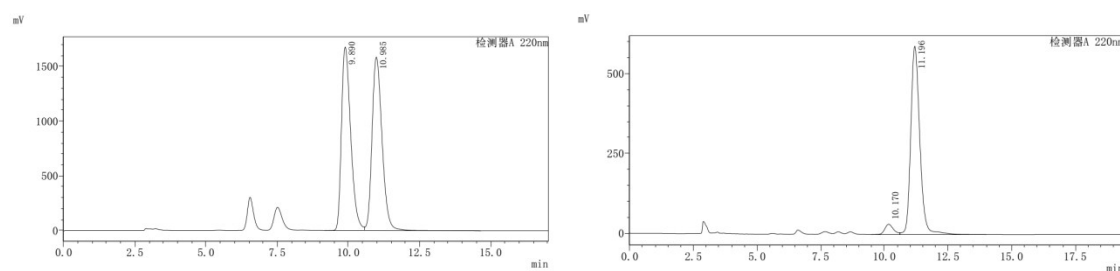

| Peak# | Ret Time | Area     | Height | Area%  |
|-------|----------|----------|--------|--------|
| 1     | 10.170   | 757654   | 32100  | 4.937  |
| 2     | 11.196   | 14588686 | 588308 | 95.063 |

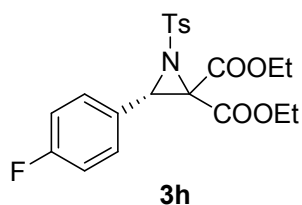

**3h**

**3h:** Colorless oil; 81.2 mg, 93% yield, 96% *ee*;  $[\alpha]_D^{25} = -5.0$  (c 0.90,  $\text{CH}_2\text{Cl}_2$ );  $^1\text{H NMR}$  (500 MHz,  $(\text{CD}_3)_2\text{SO}$ )  $\delta$  7.93 (d,  $J = 7.8$ , 2H), 7.4 (d,  $J = 7.7$ , 2H), 7.36-7.26 (m, 2H), 7.13 (t,  $J = 8.1$ , 2H), 4.95 (s, 1H),

4.32-4.29 (m, 2H), 3.95-3.92 (m, 2H), 2.38 (s, 3H), 1.26 (t,  $J = 6.9$ , 3H), 0.81 (t,  $J = 6.8$ , 3H) ppm.  
 The *ee* was determined by HPLC analysis using a Chiralcel OJ-H column, hexane/2-propanol 70/30, flow rate = 1.0 mL/min, 220 nm,  $t_r = 10.91$  min (major) and  $t_r = 15.34$  min (minor).

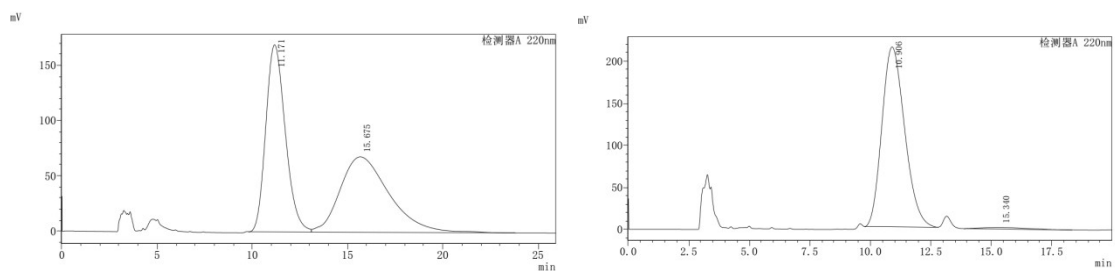

| Peak# | Ret Time | Area     | Height | Area%  |
|-------|----------|----------|--------|--------|
| 1     | 10.906   | 14015804 | 214097 | 98.288 |
| 2     | 15.340   | 244104   | 1904   | 1.712  |

# 10. Copies of NMR spectra

L1

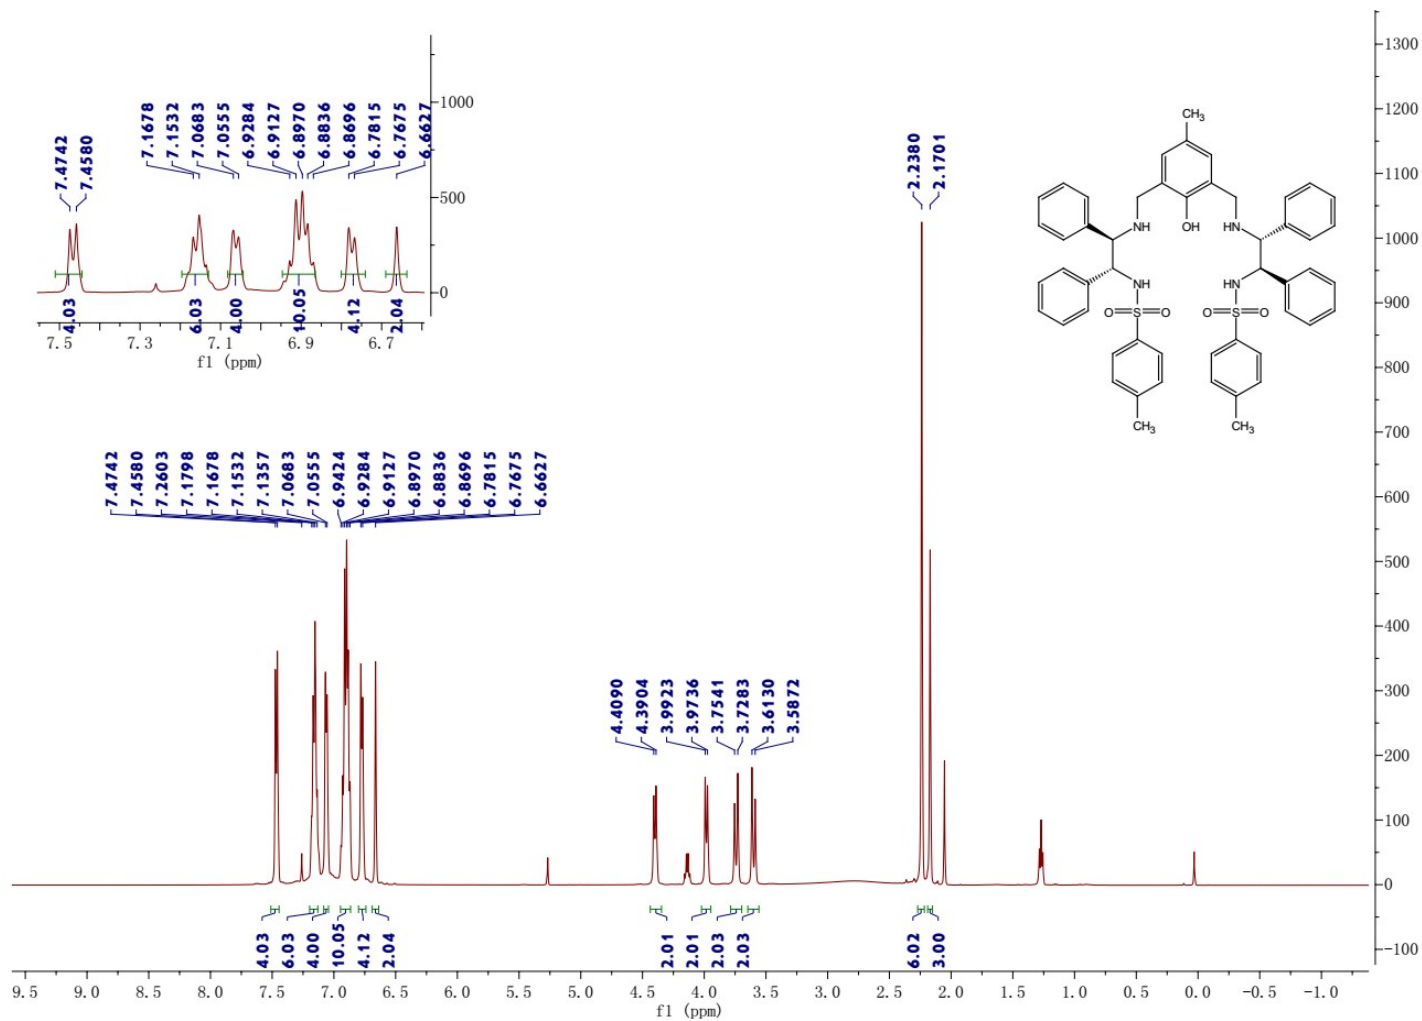

S31

L1

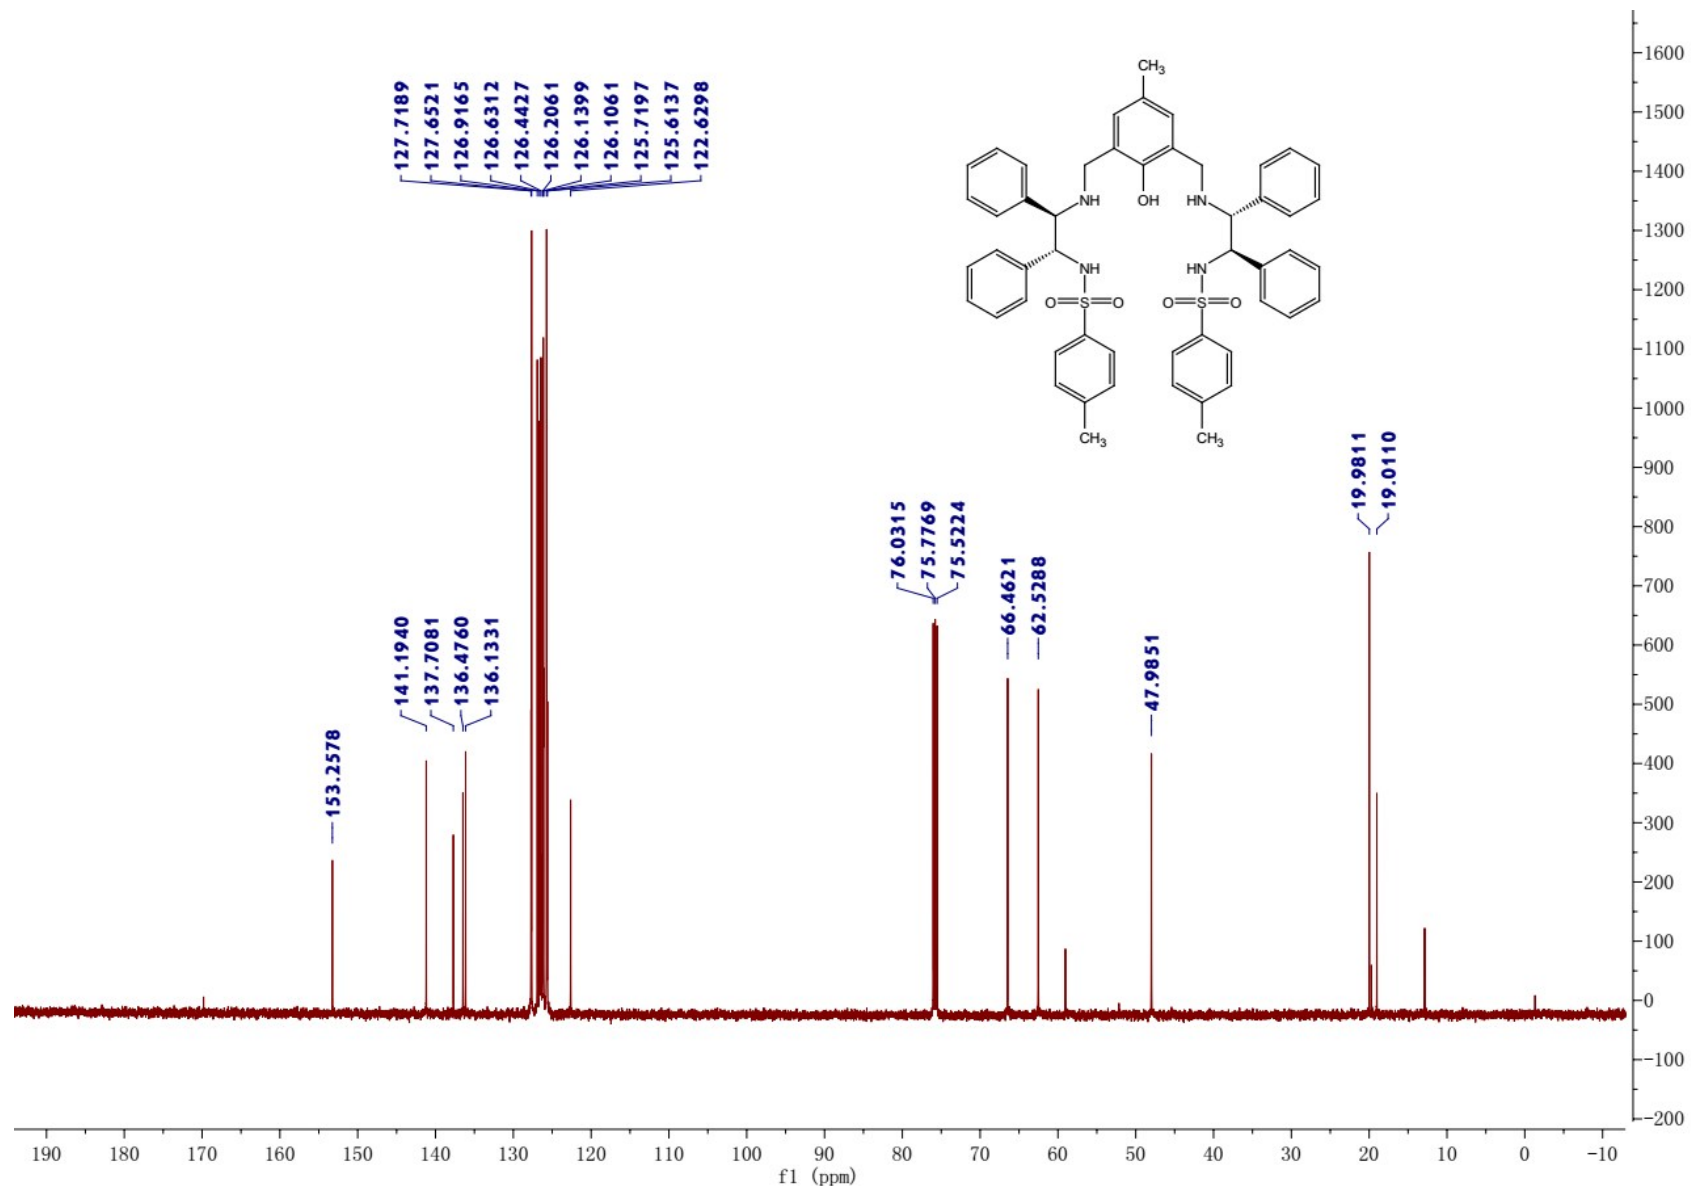

S32



L2

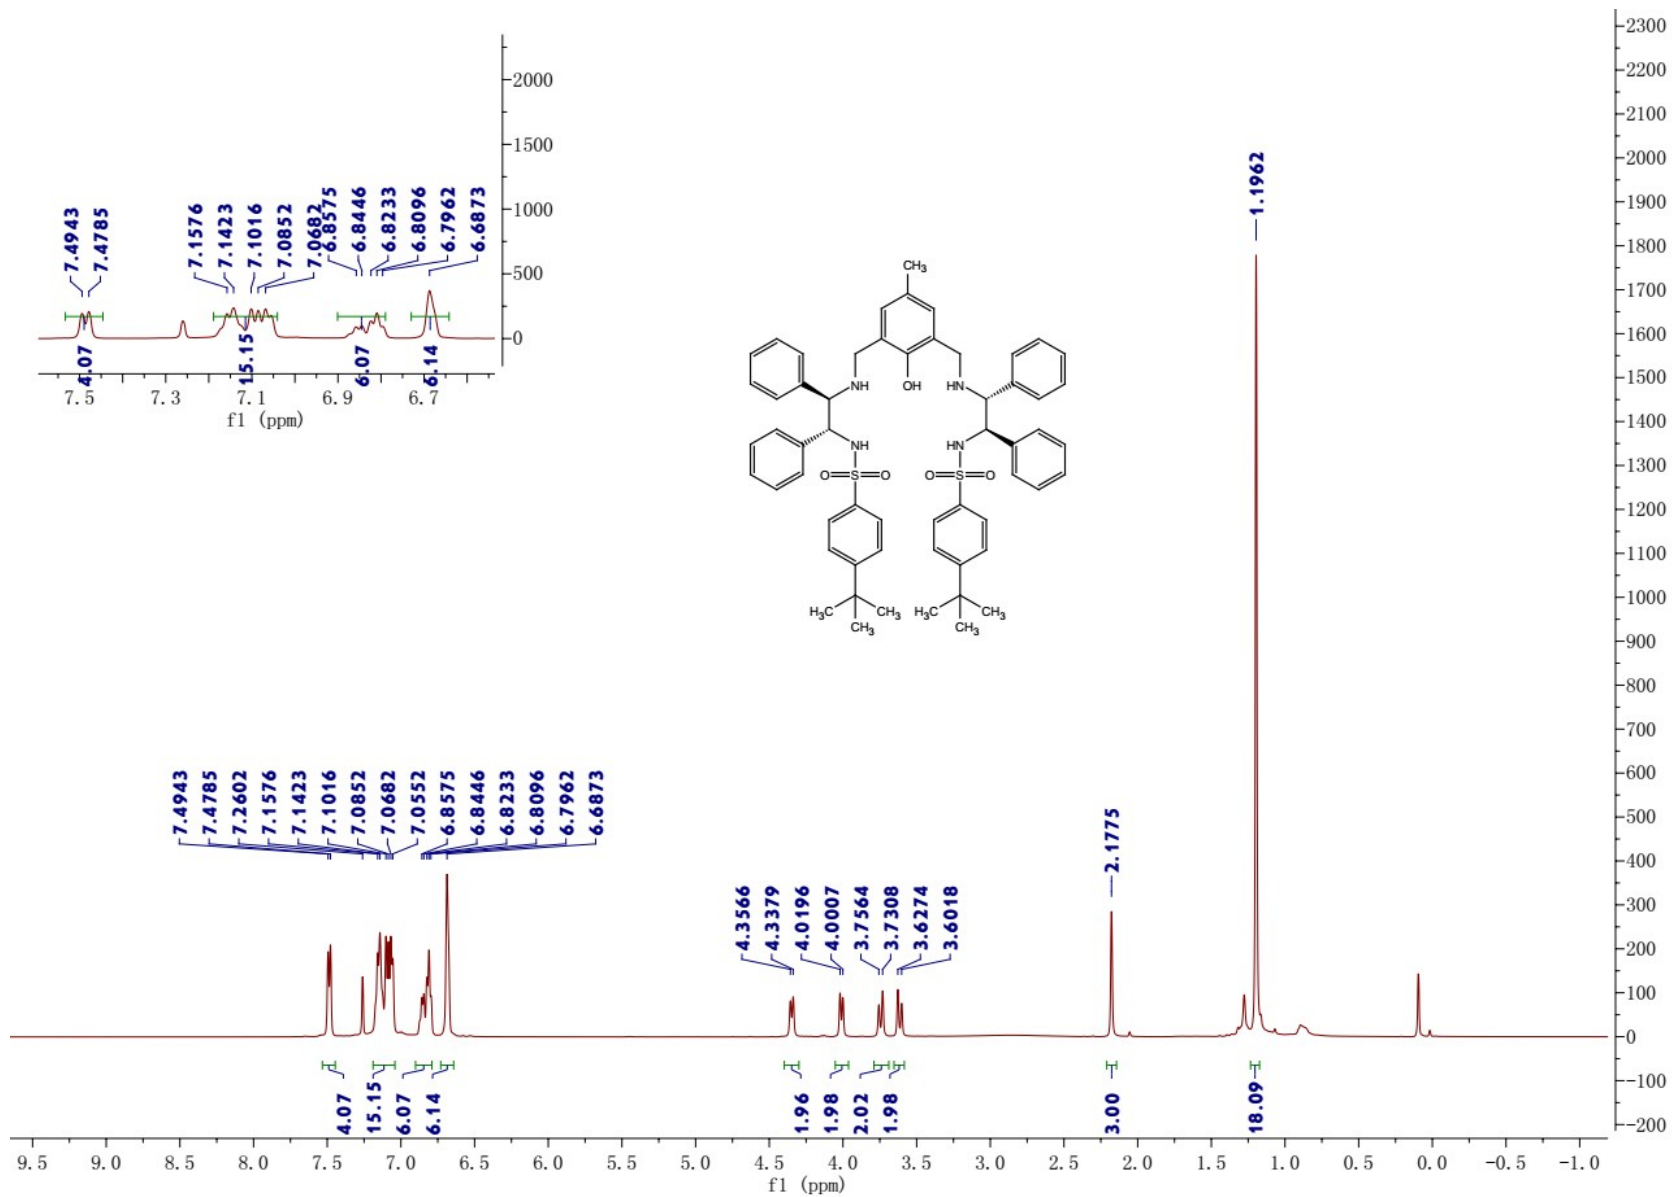

S33

L2

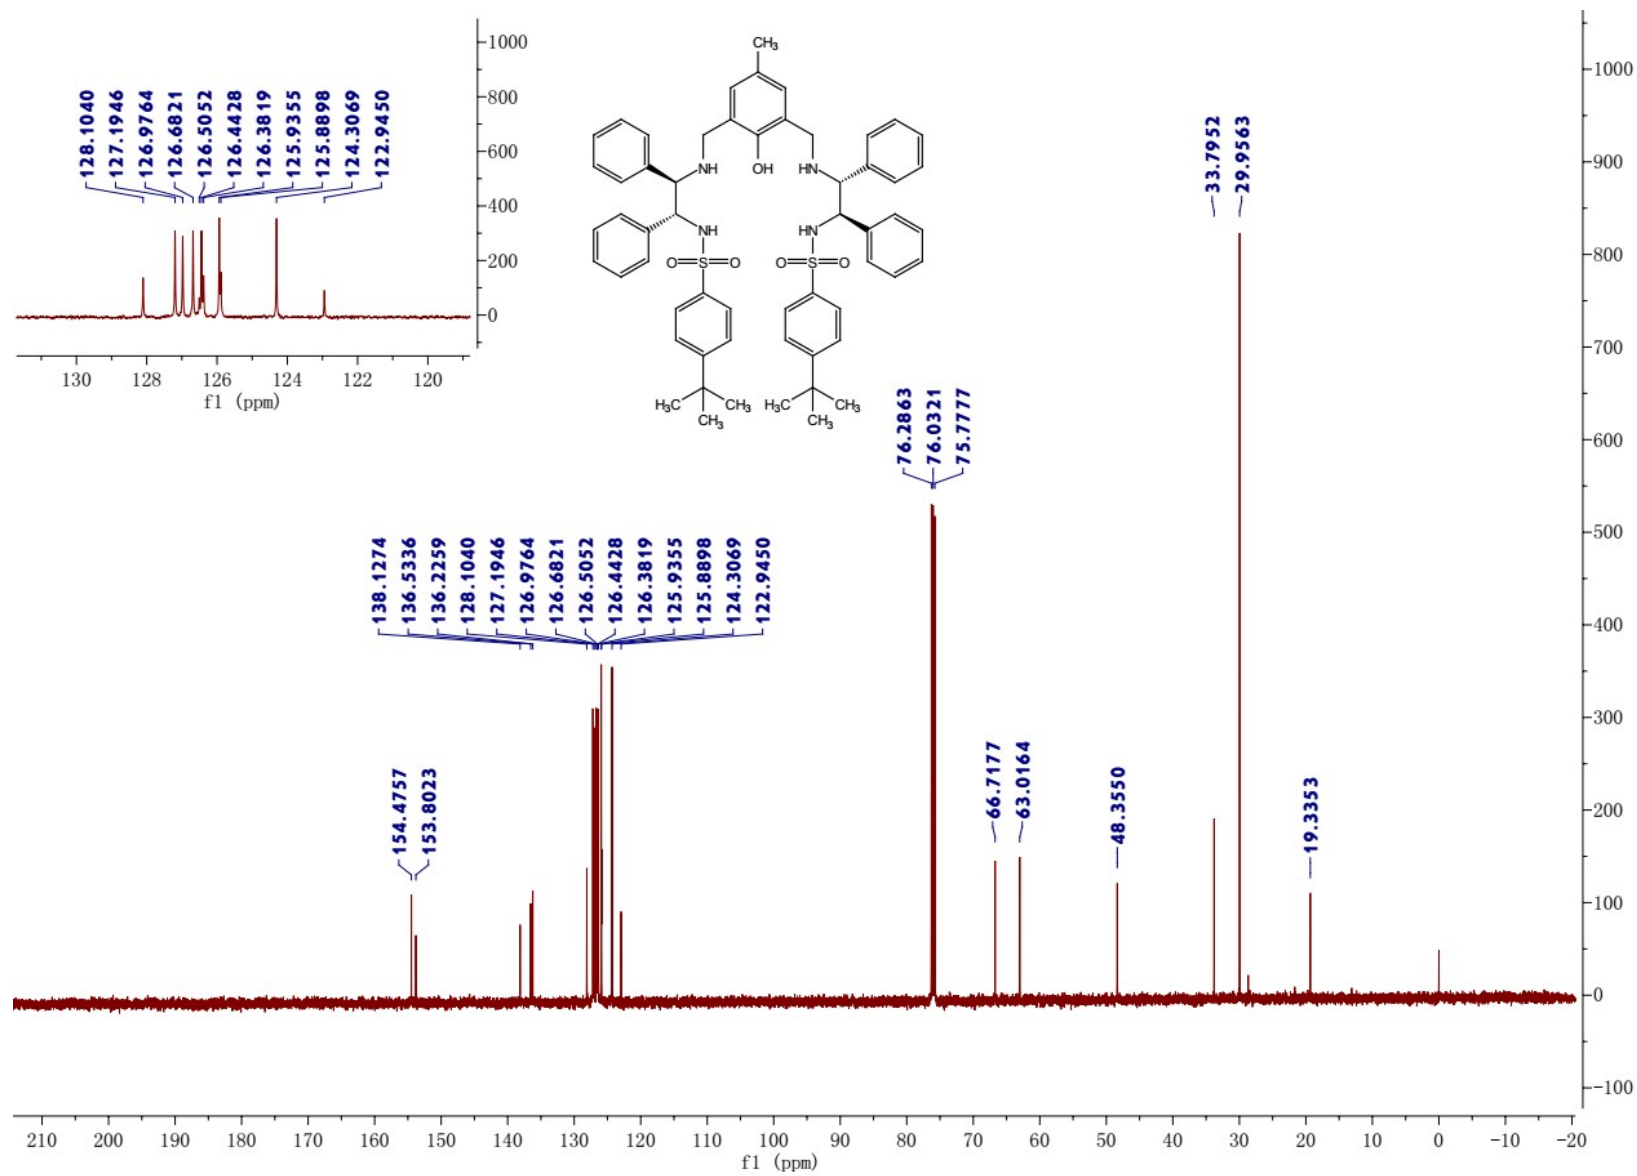

L3

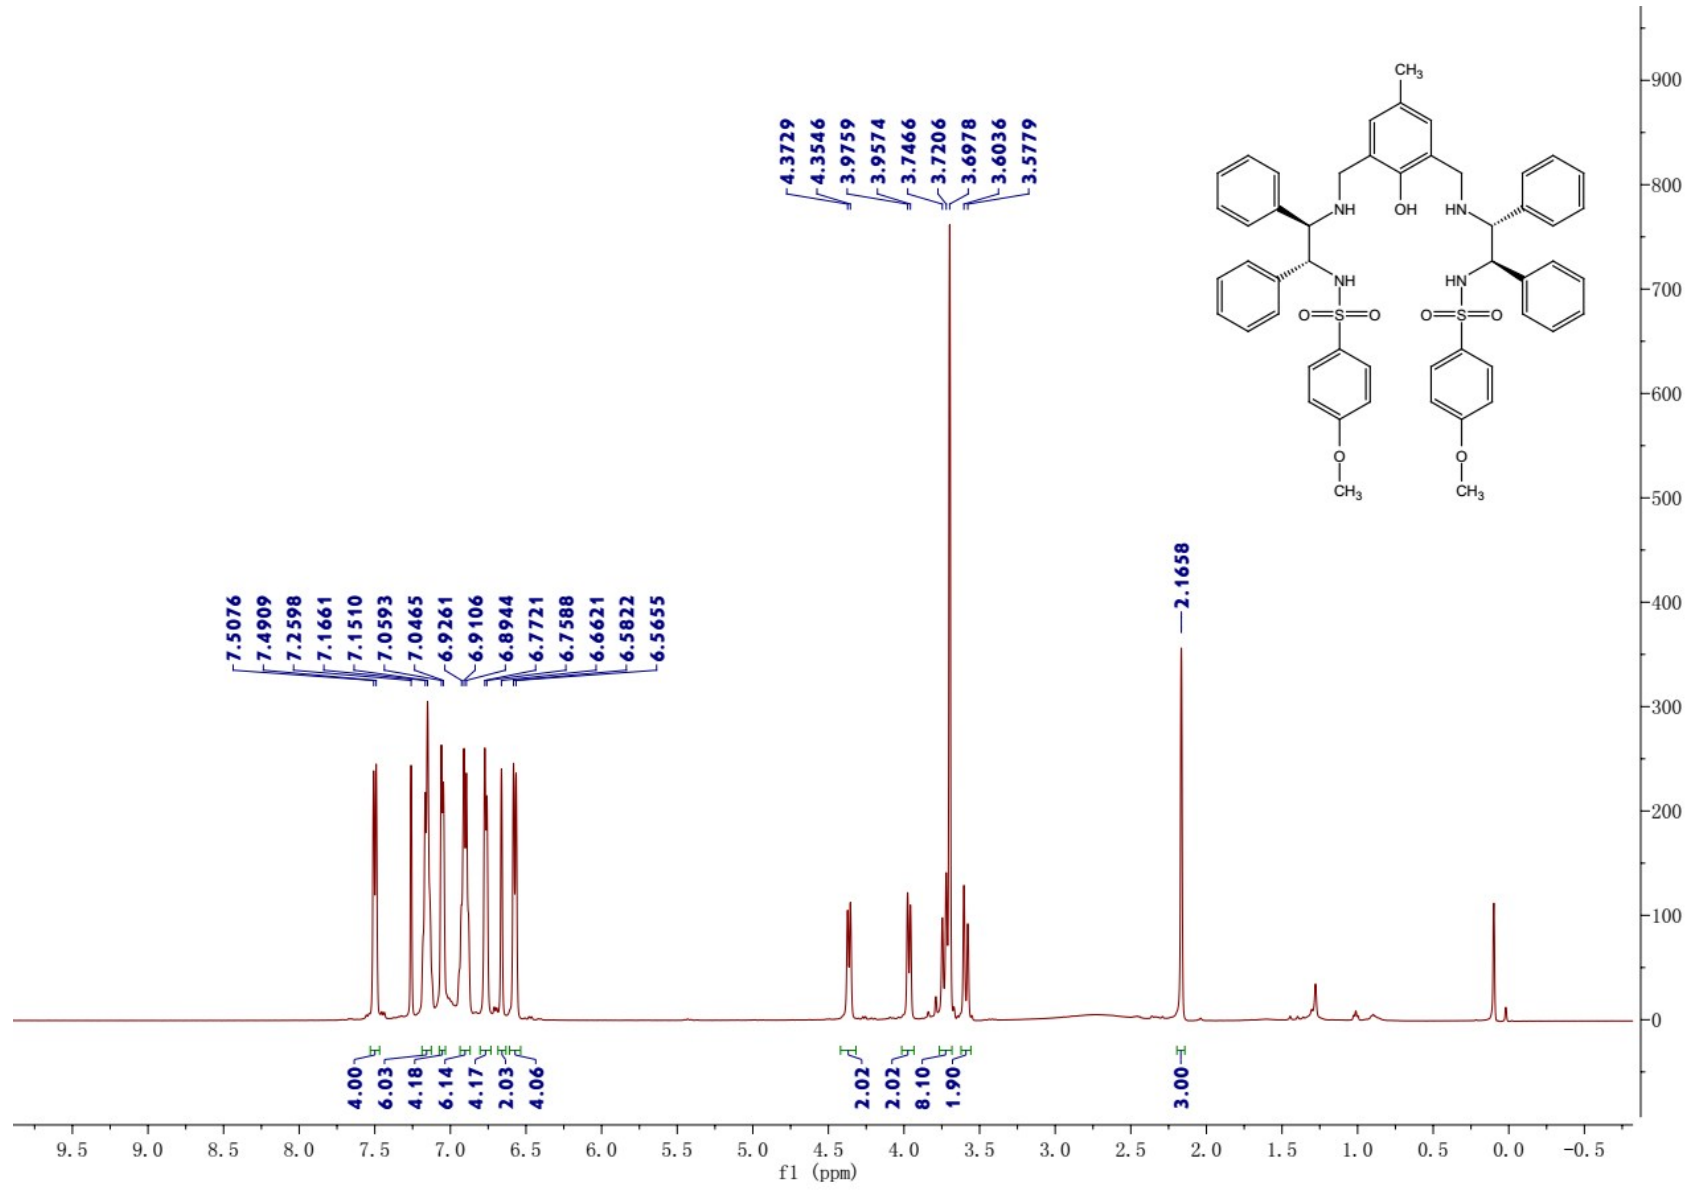

S35

L3

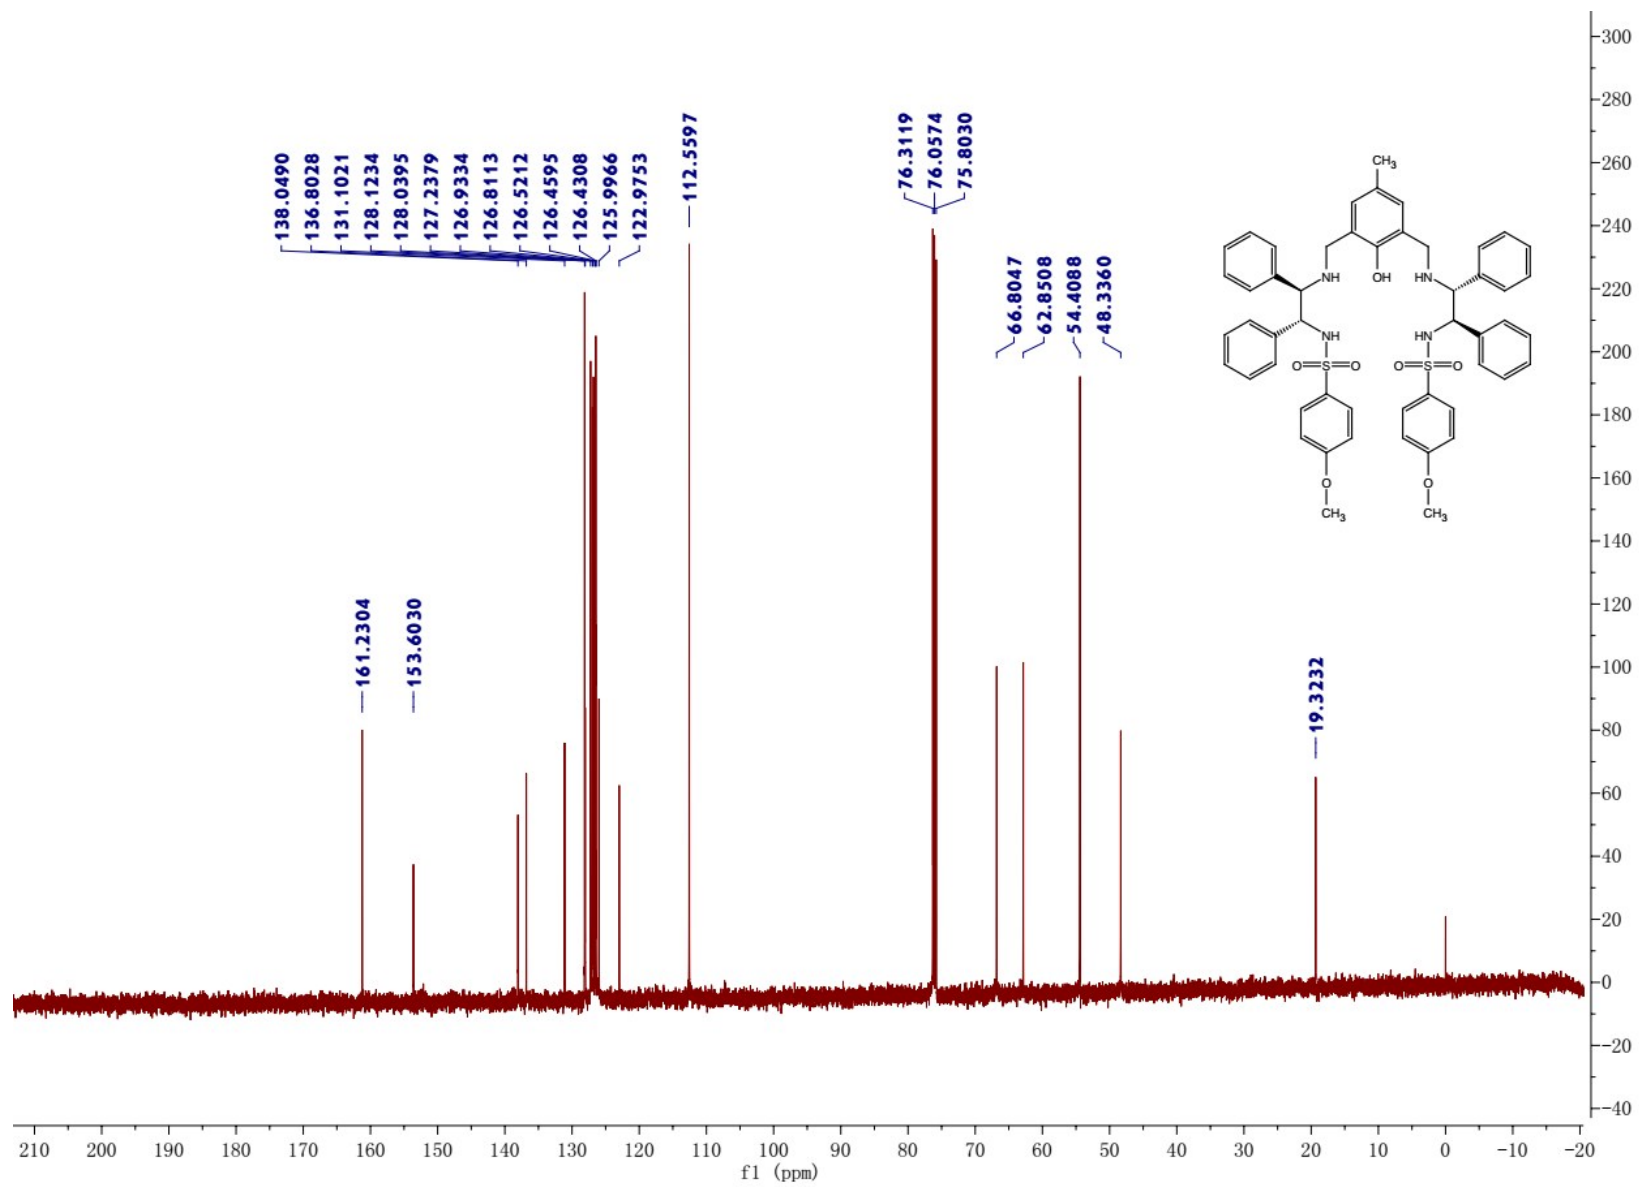

S36

L4

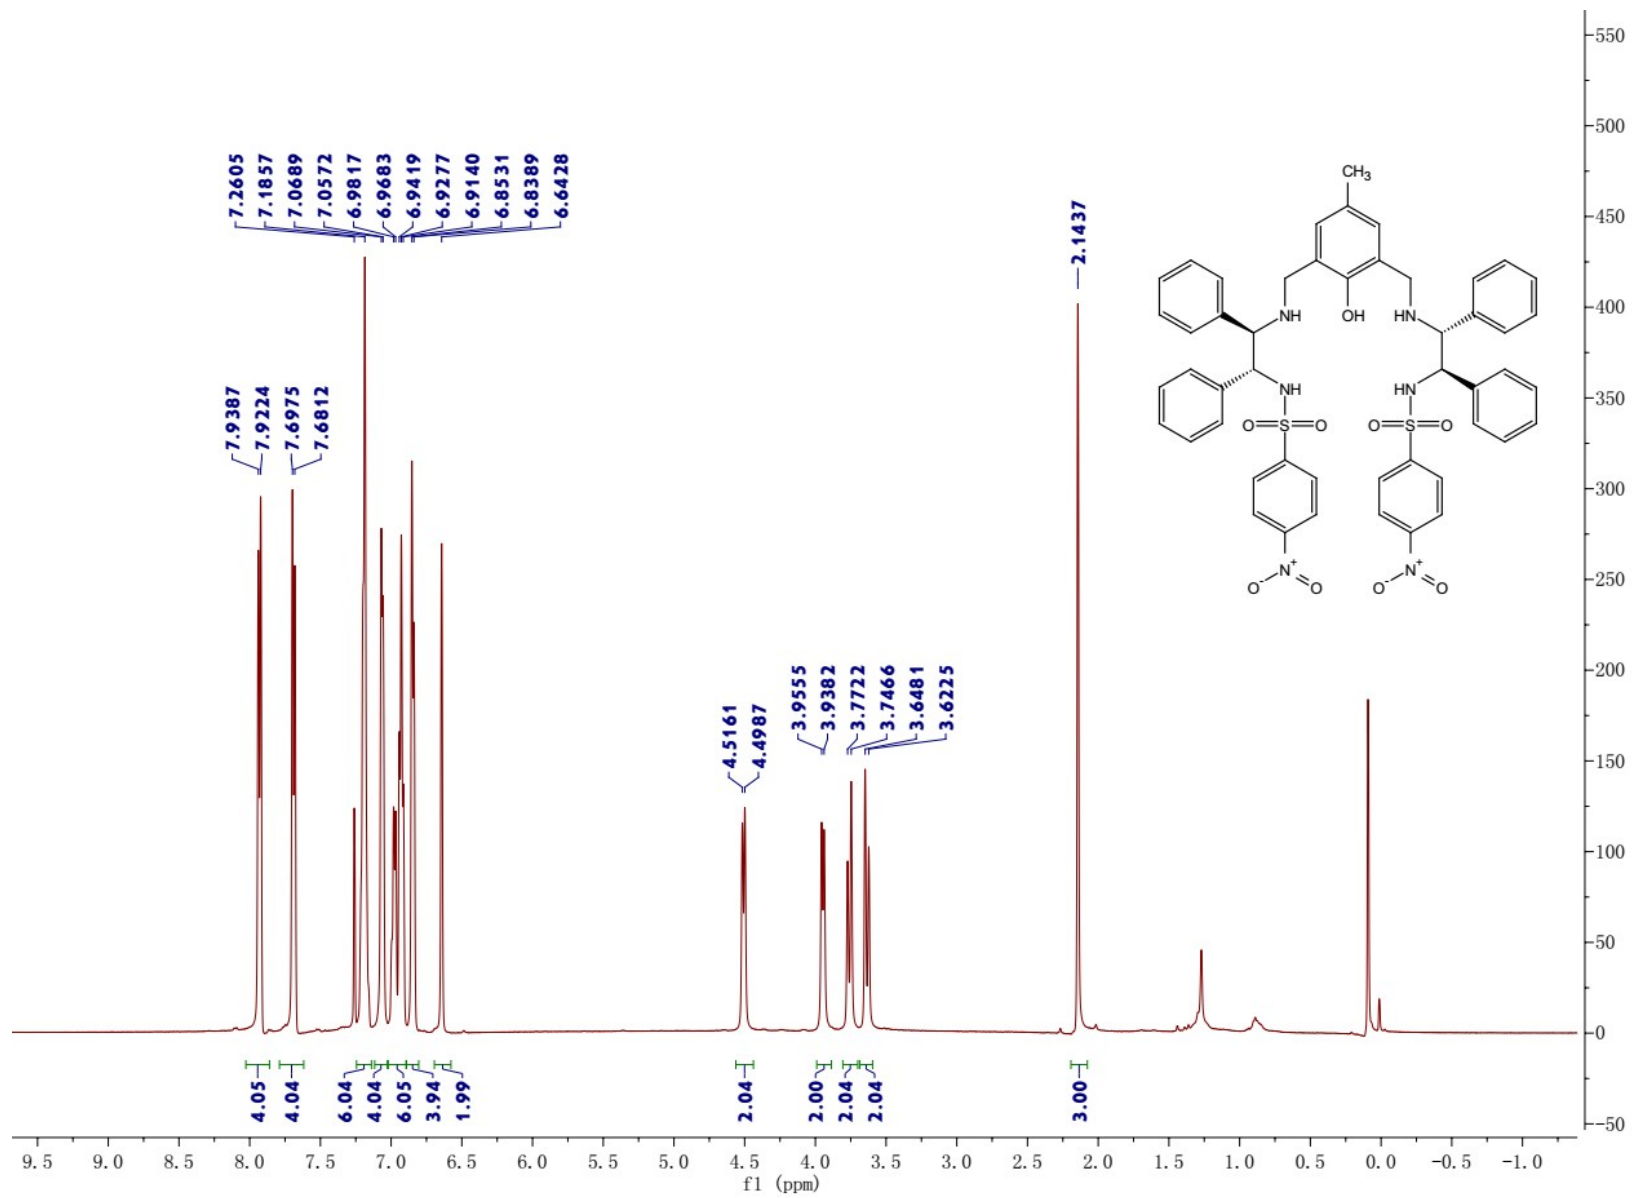

S37

L4

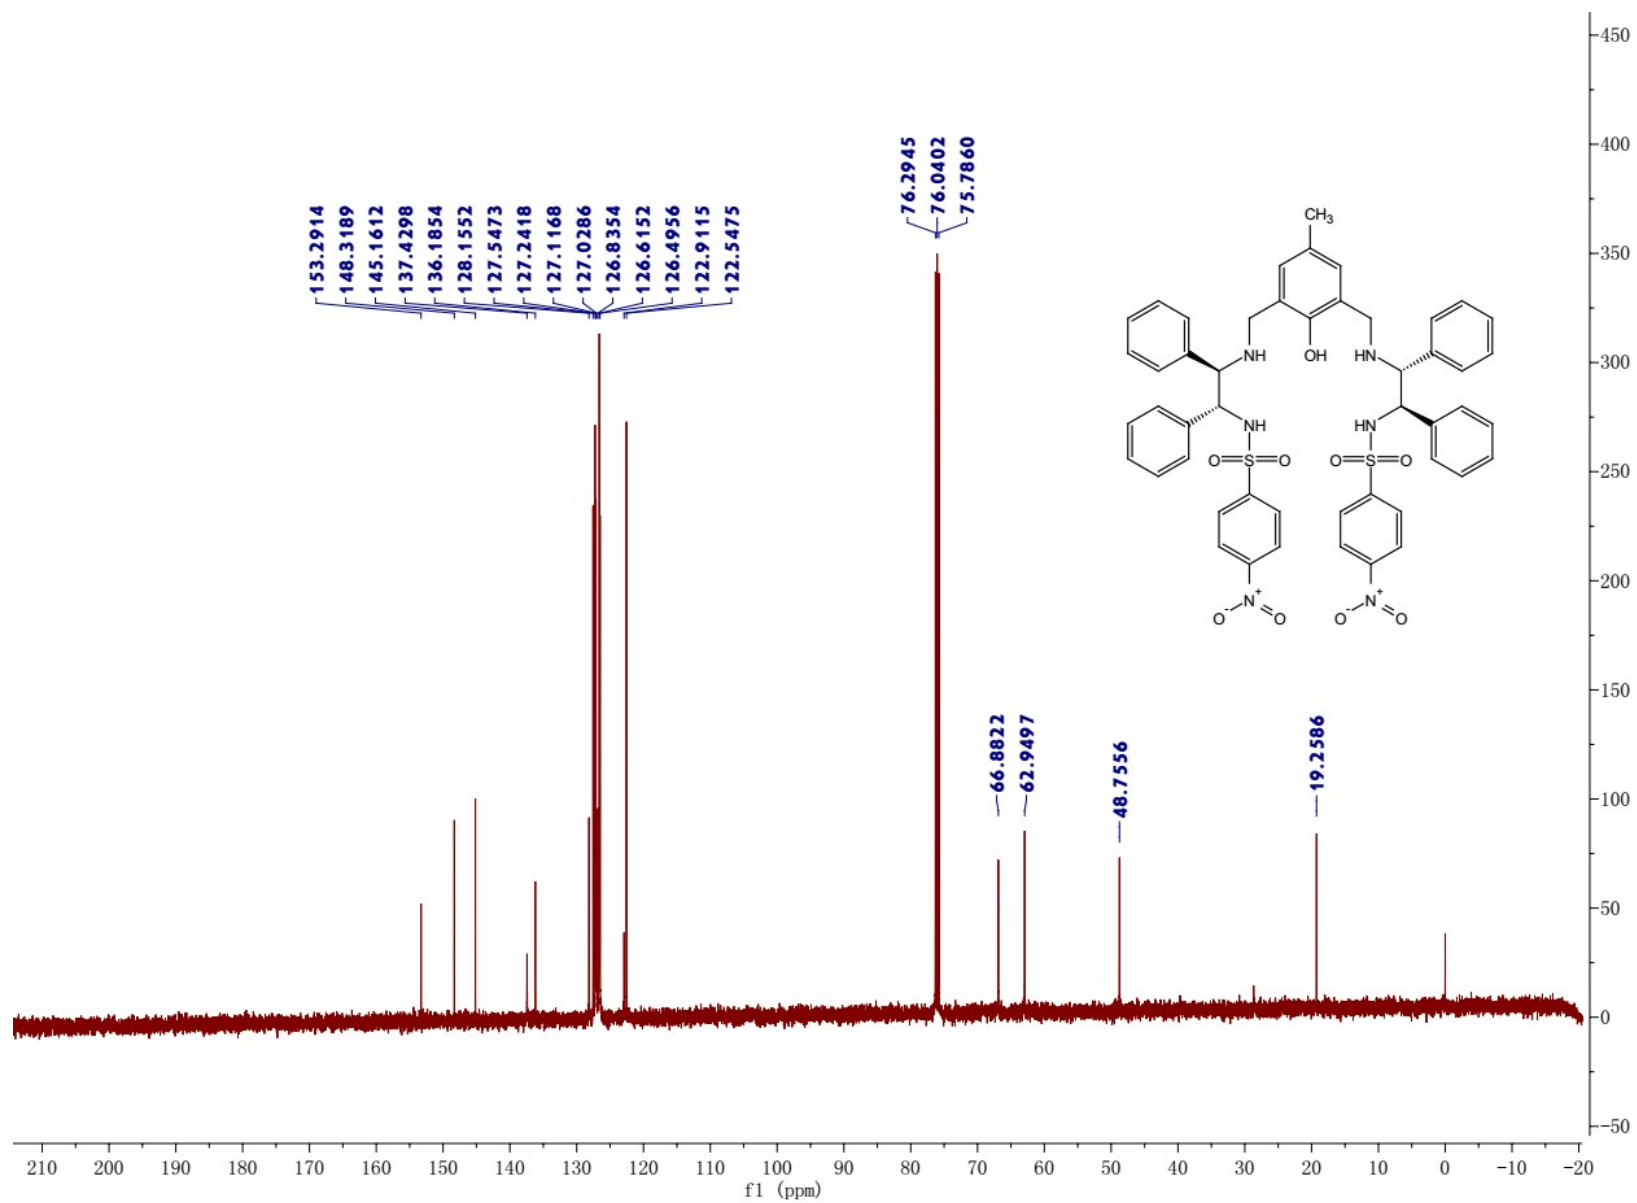

S38

L5

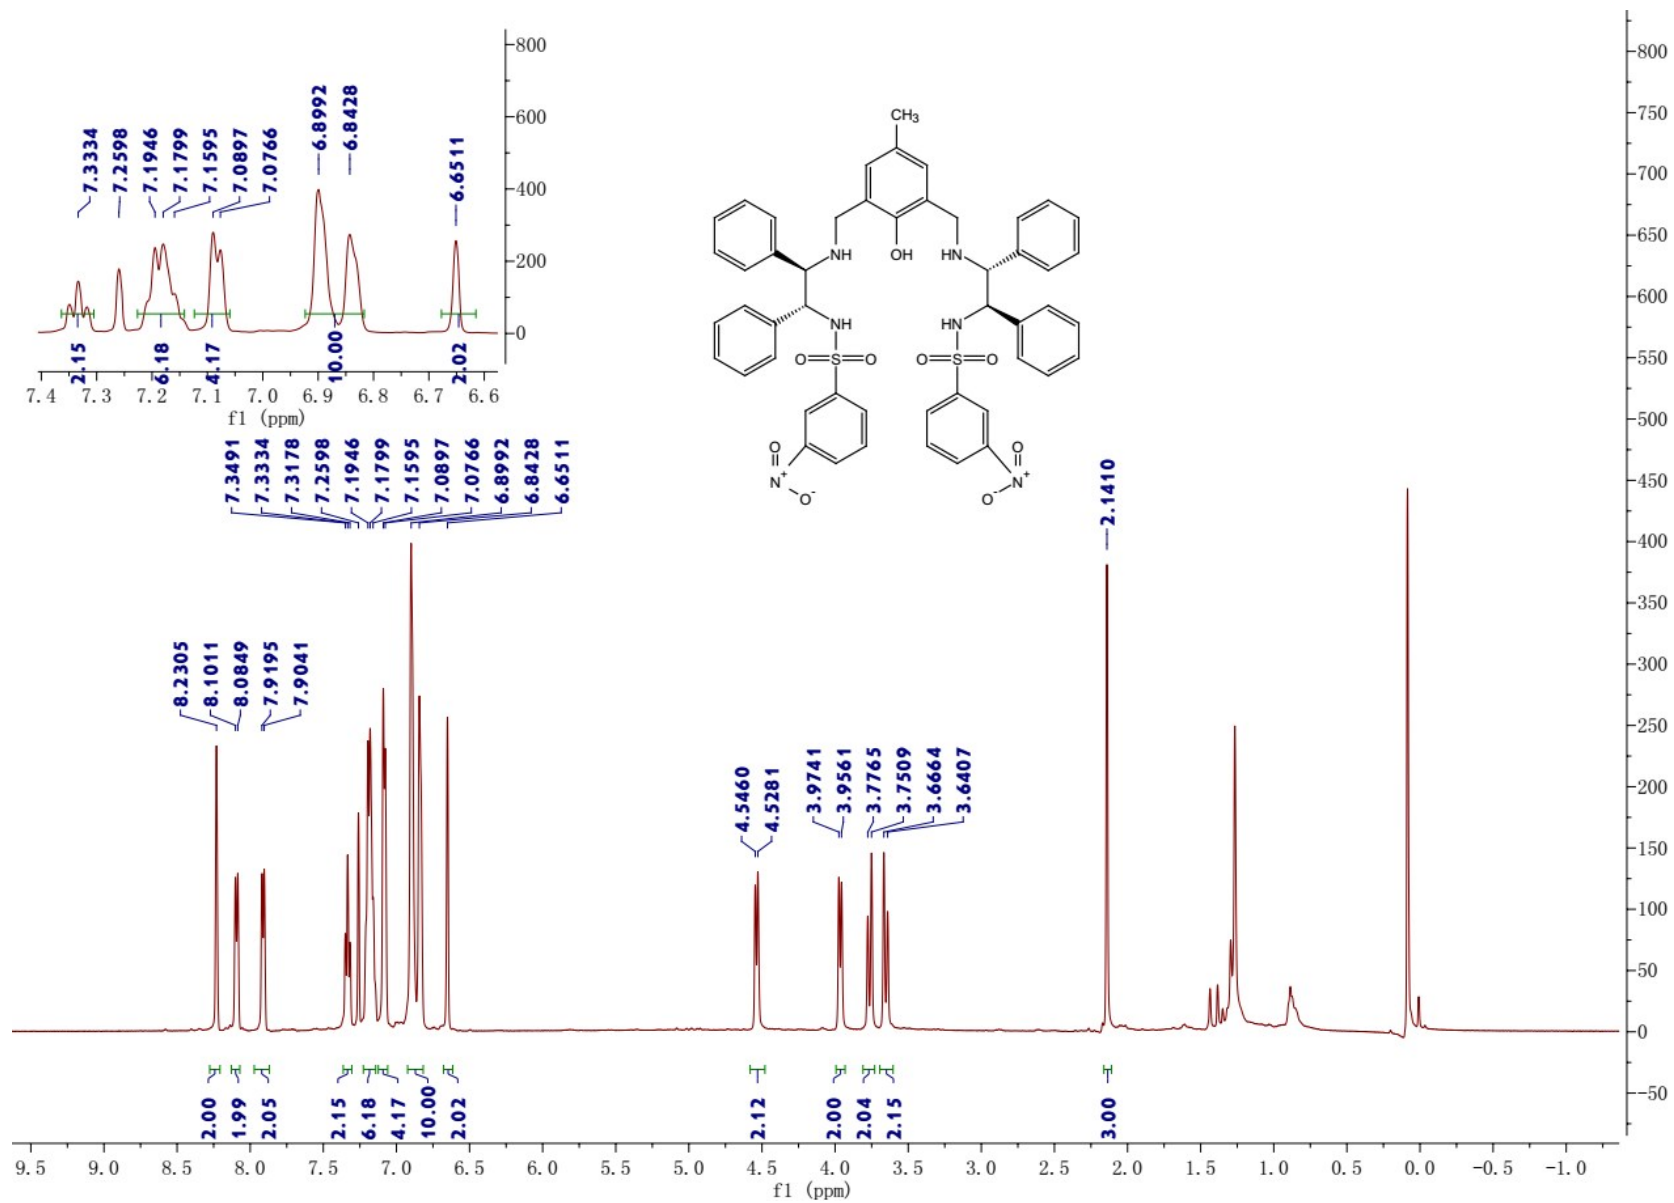

S39

L5

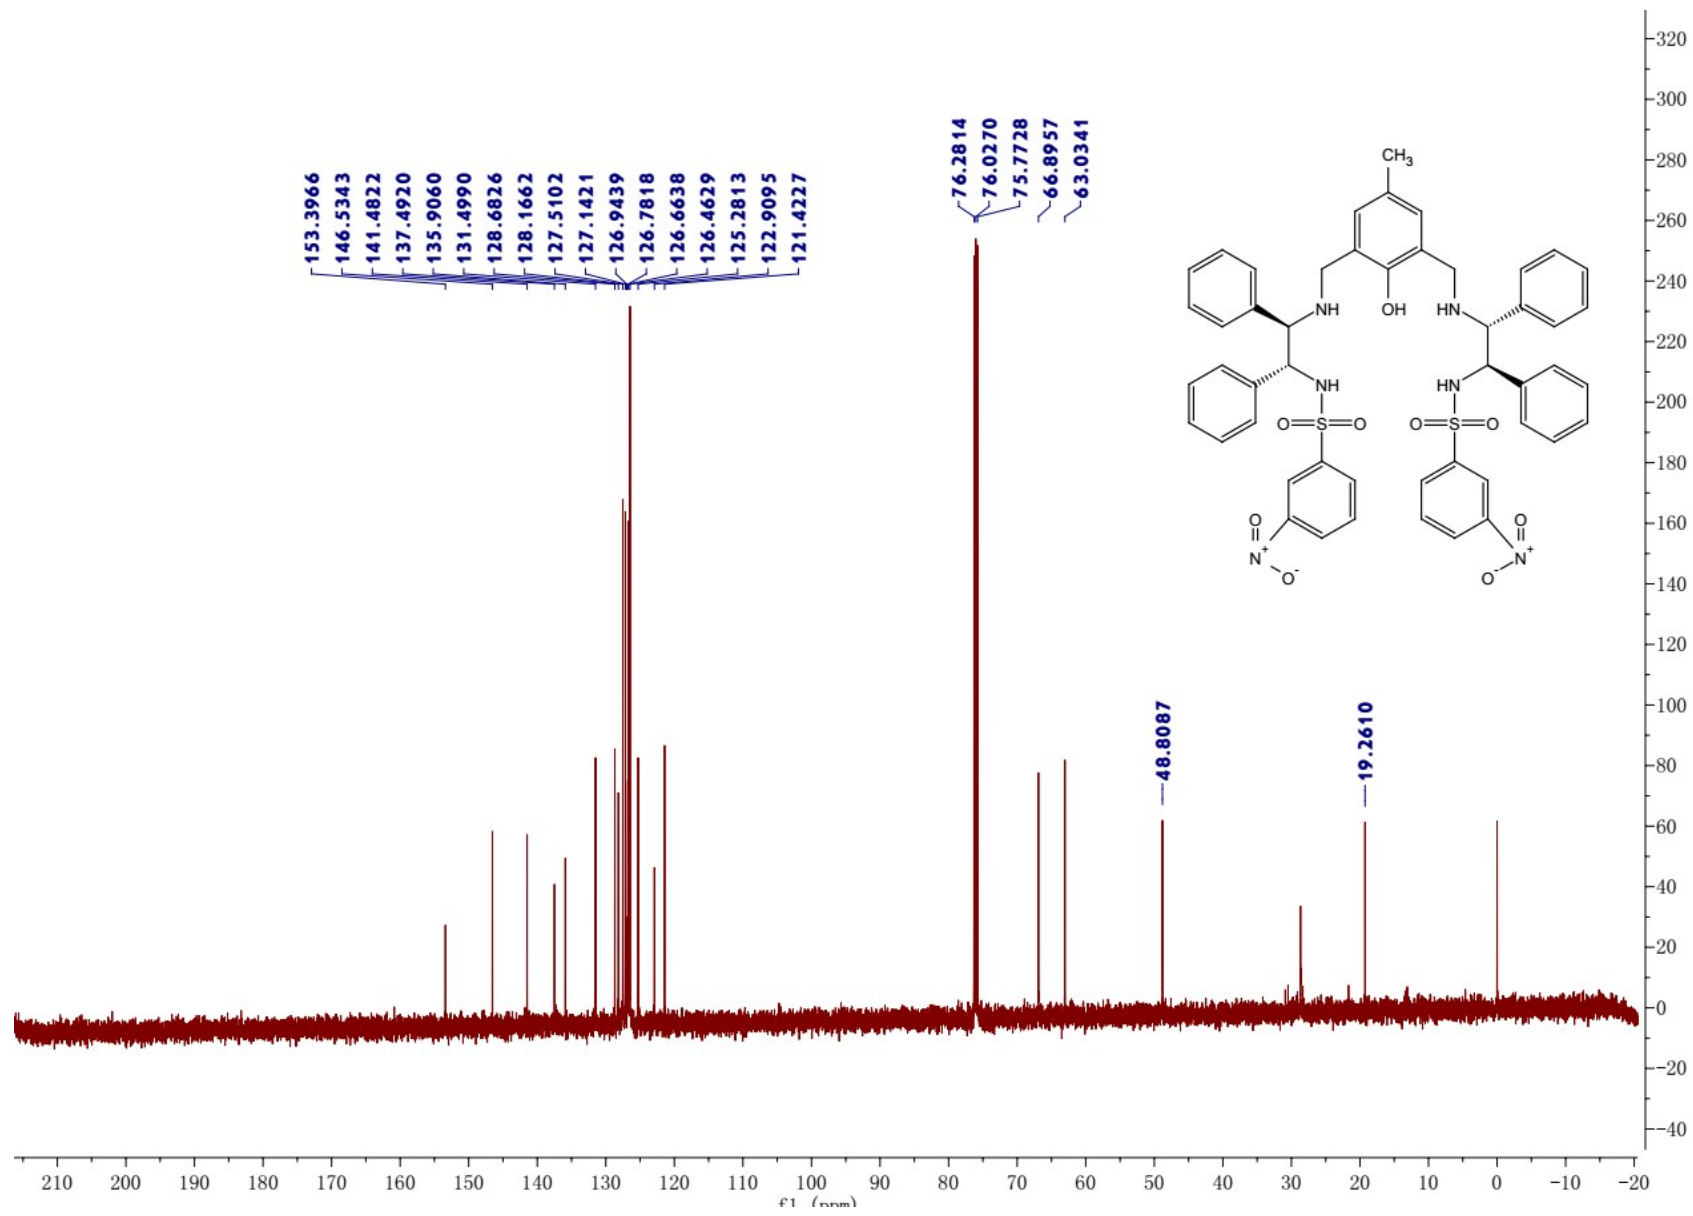

S40



L6

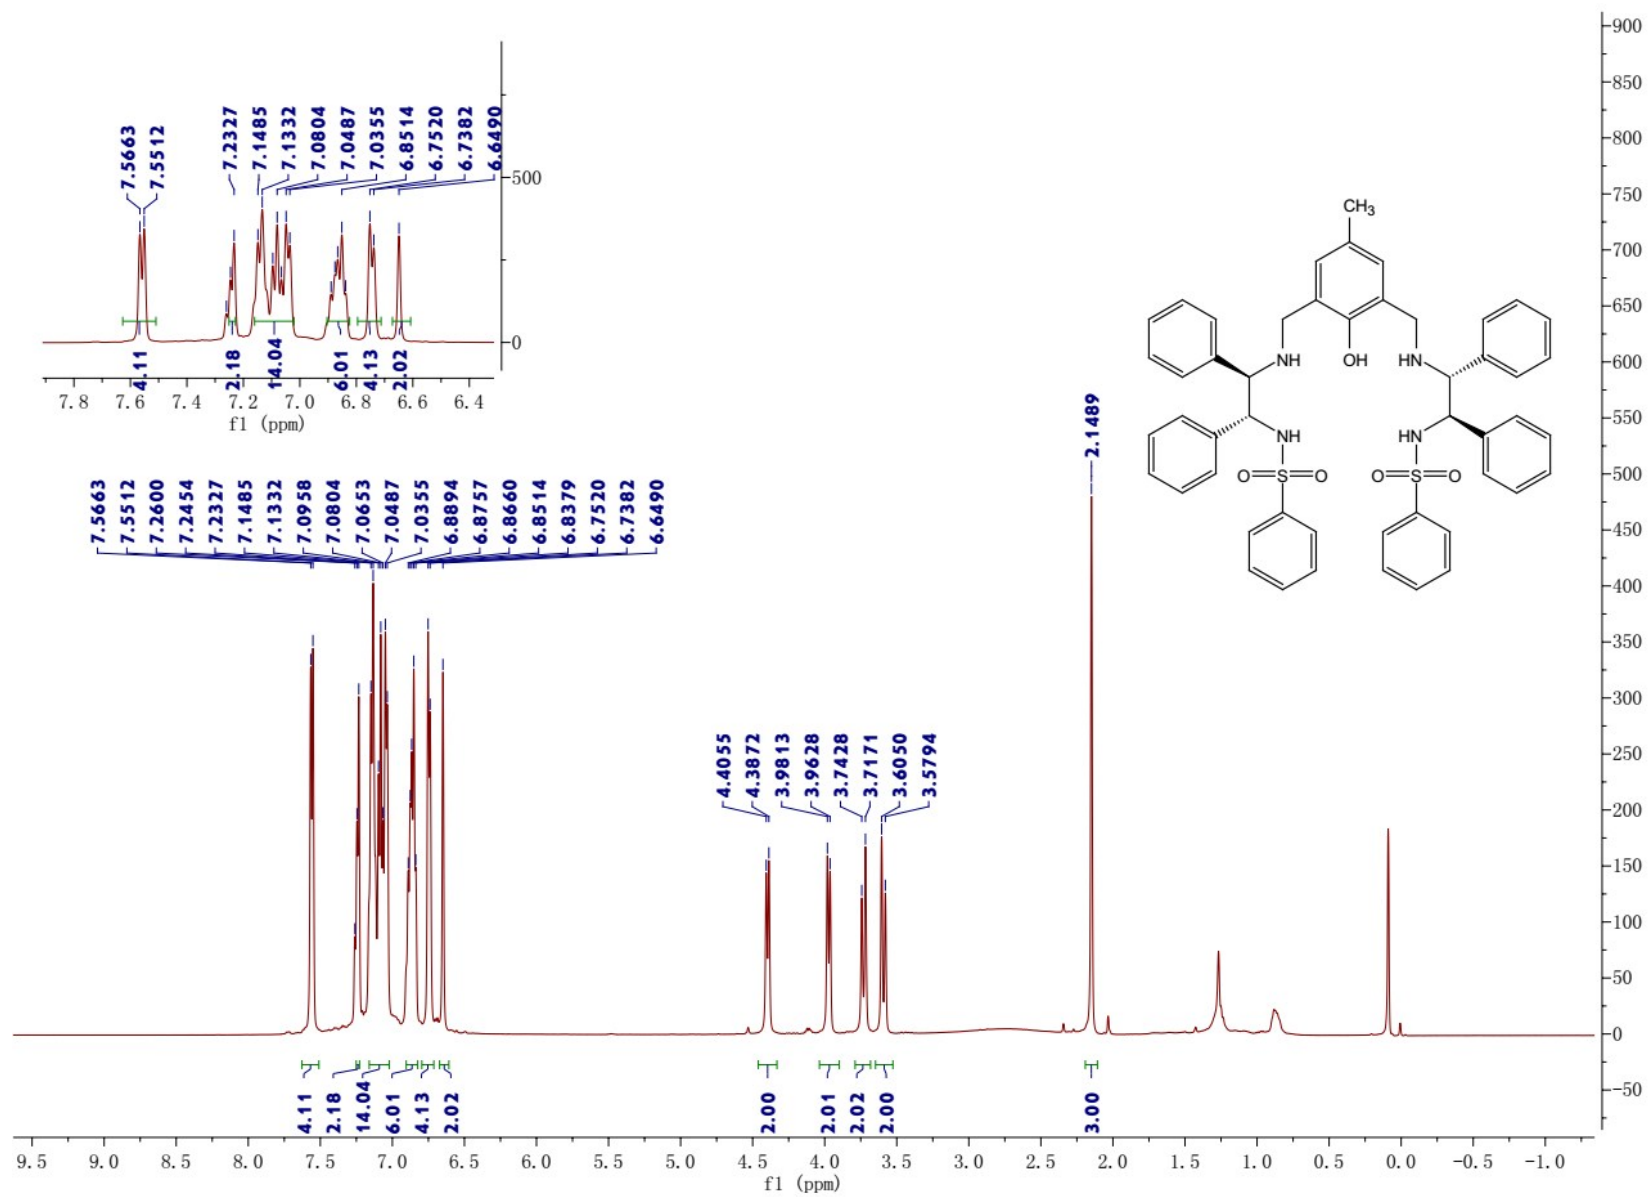

S41

L6

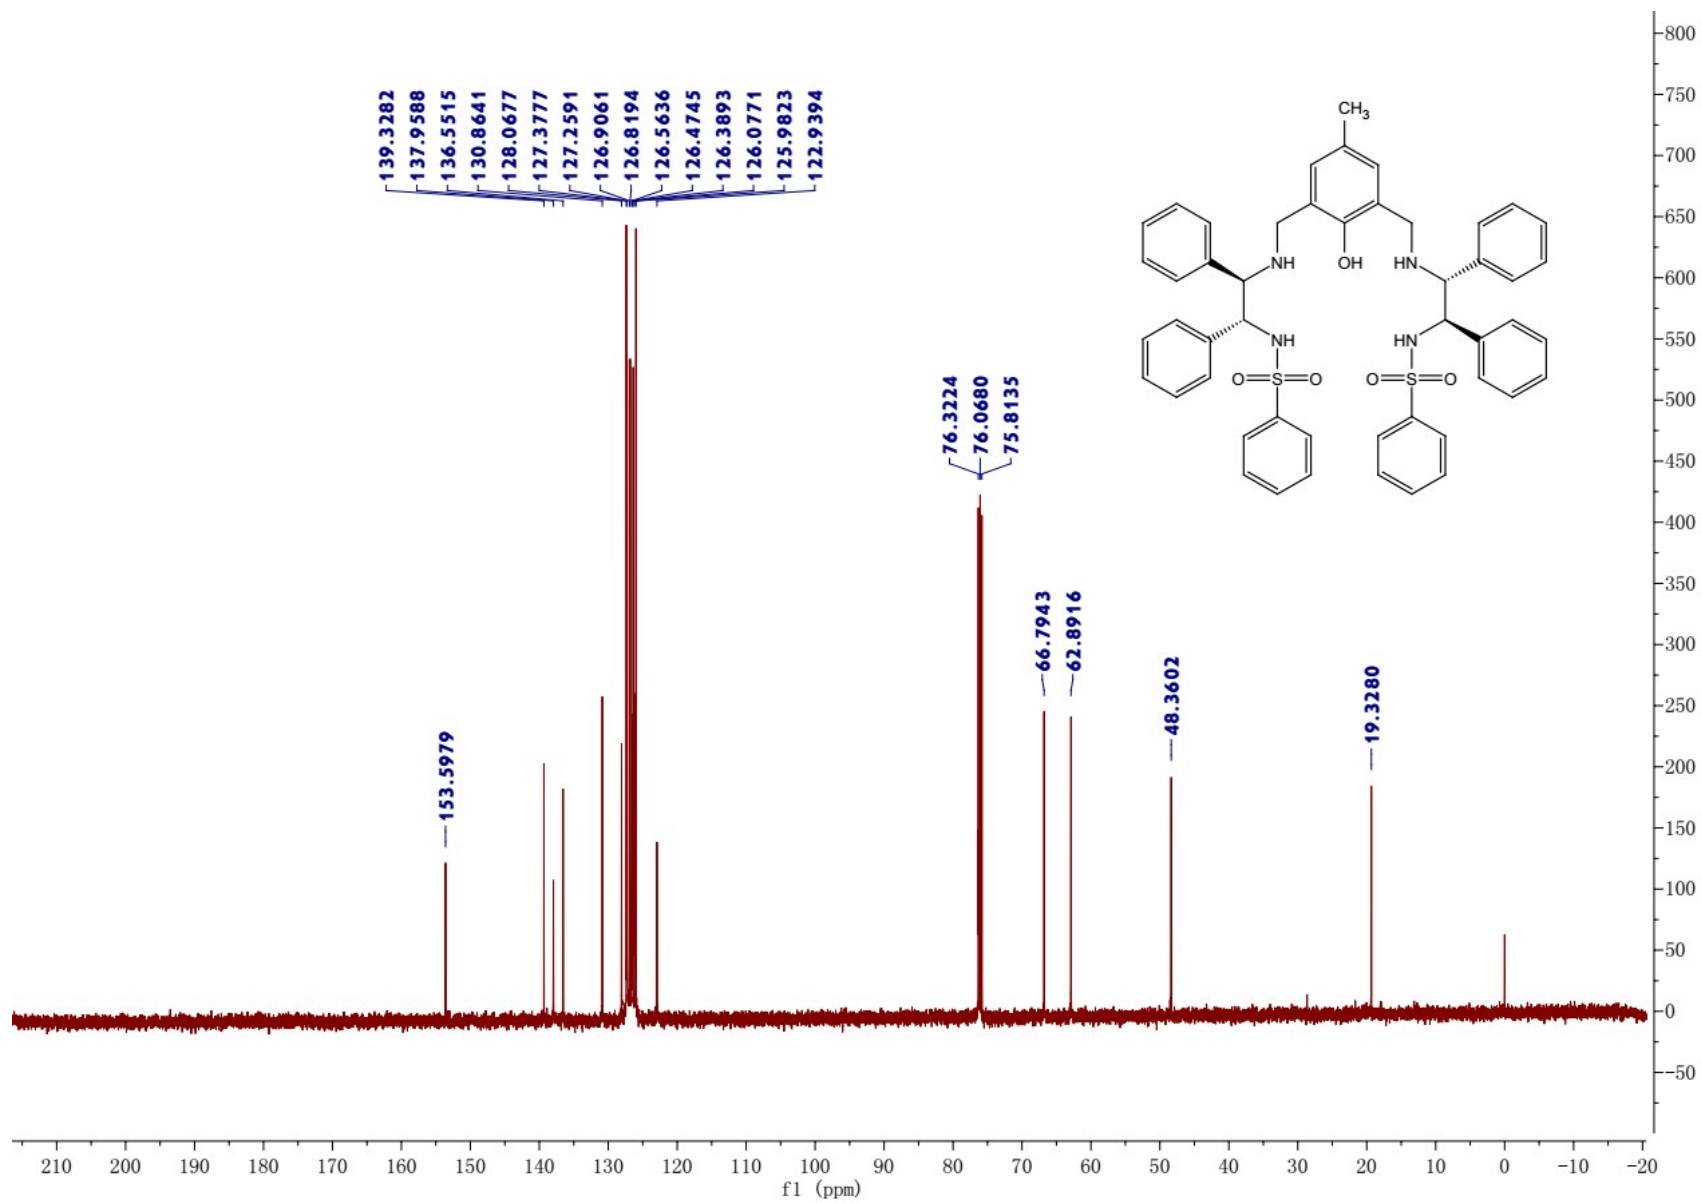

S42

L7

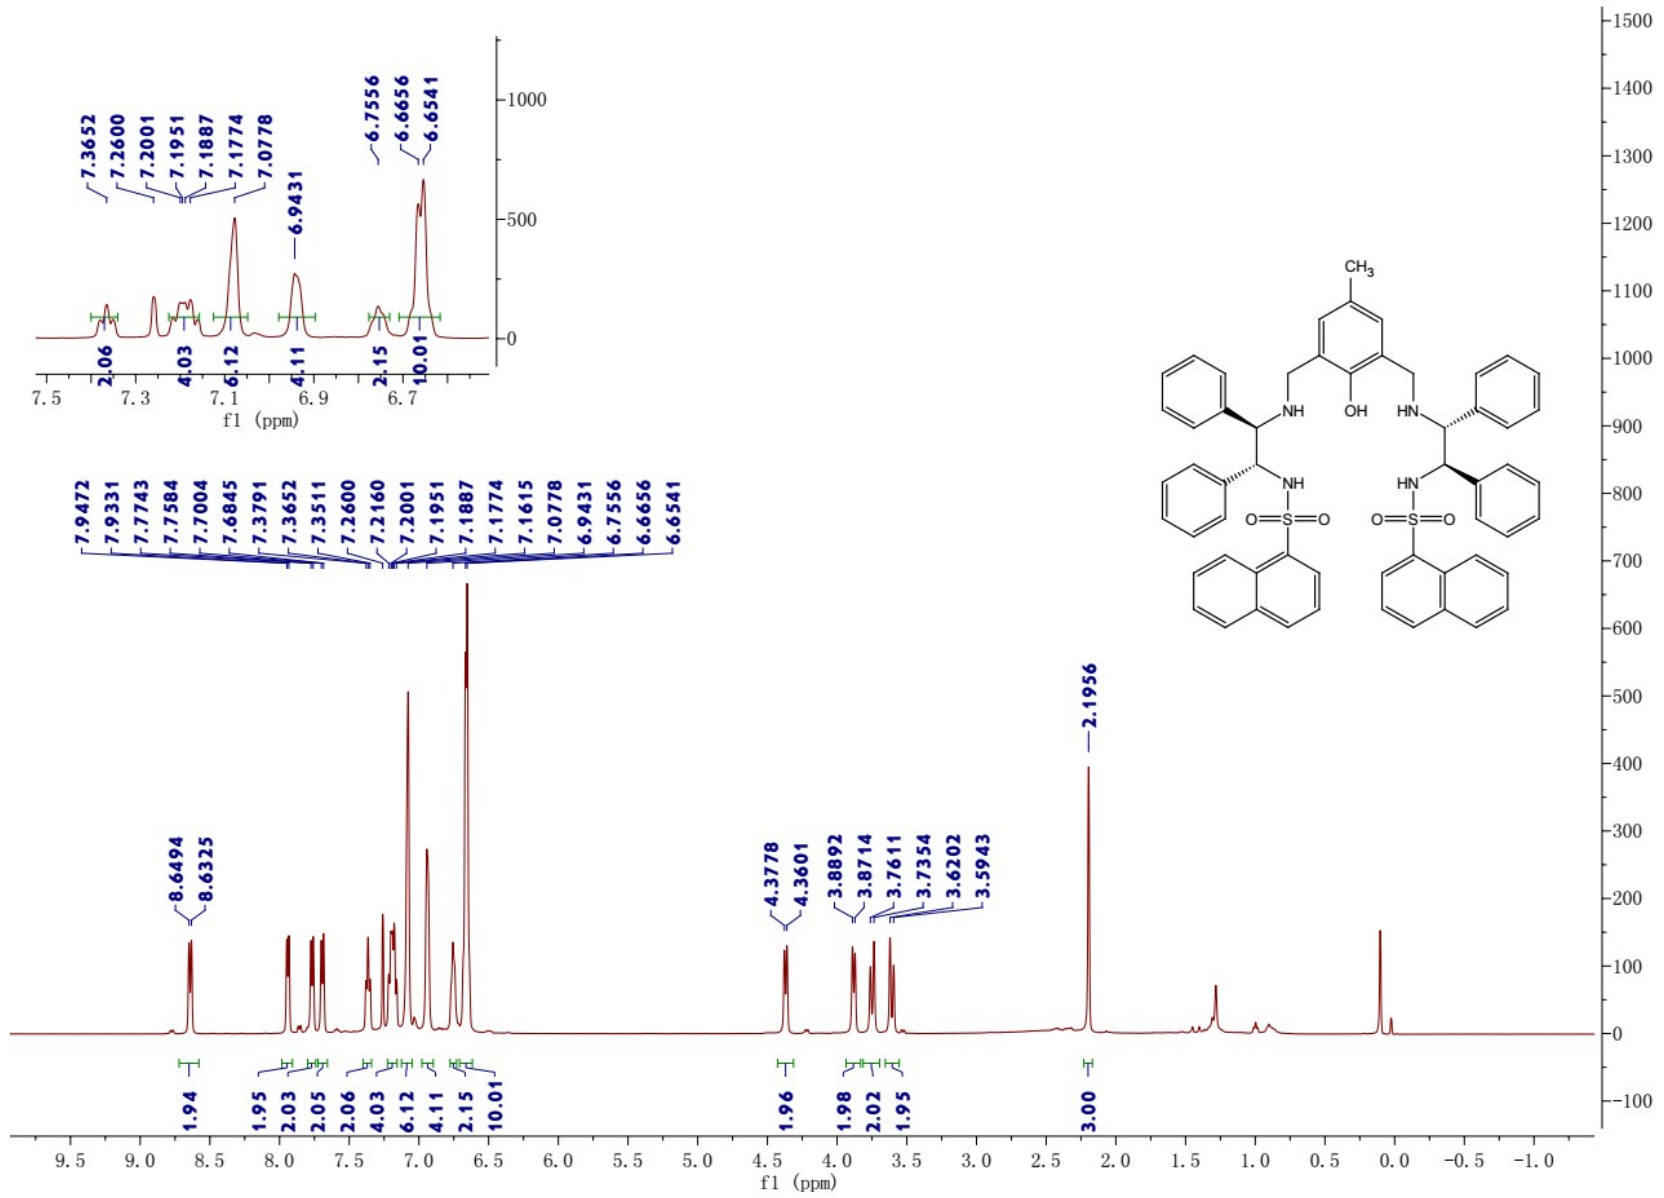

S43

L7

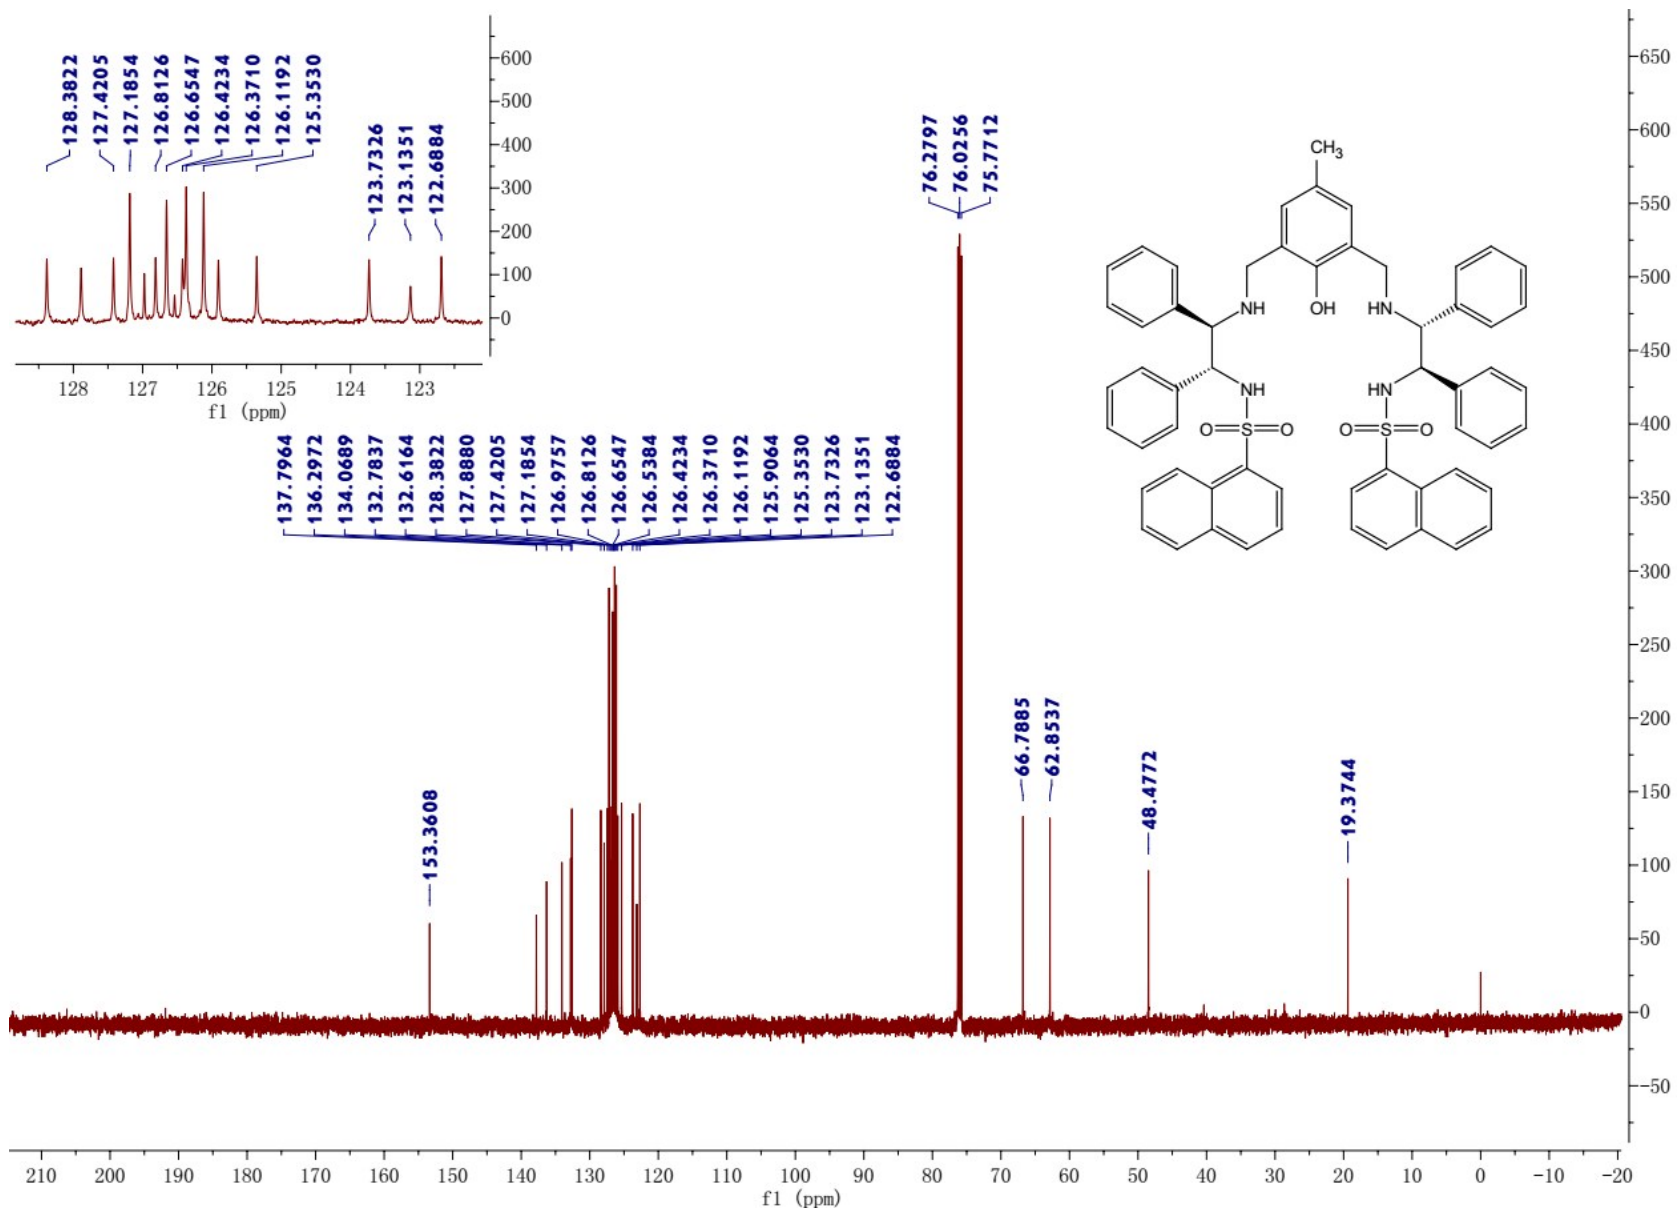

S44

L8

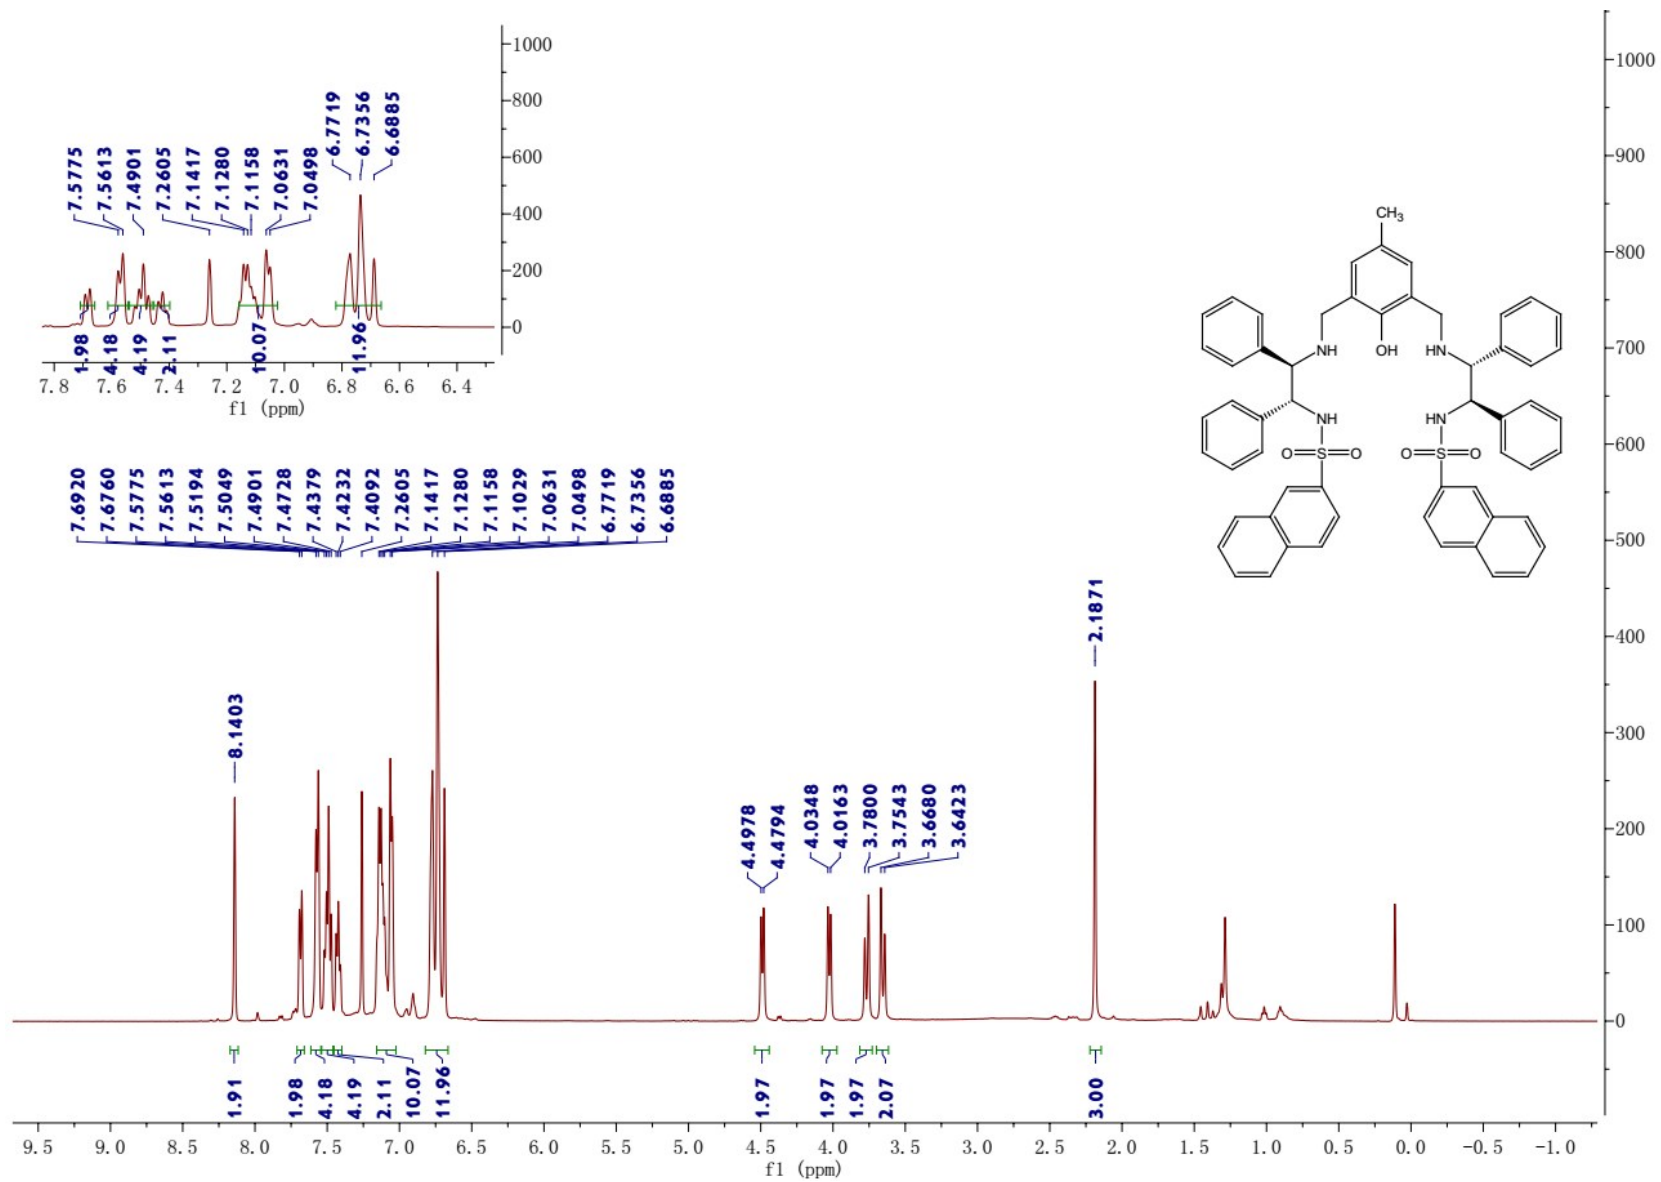

S45

L8

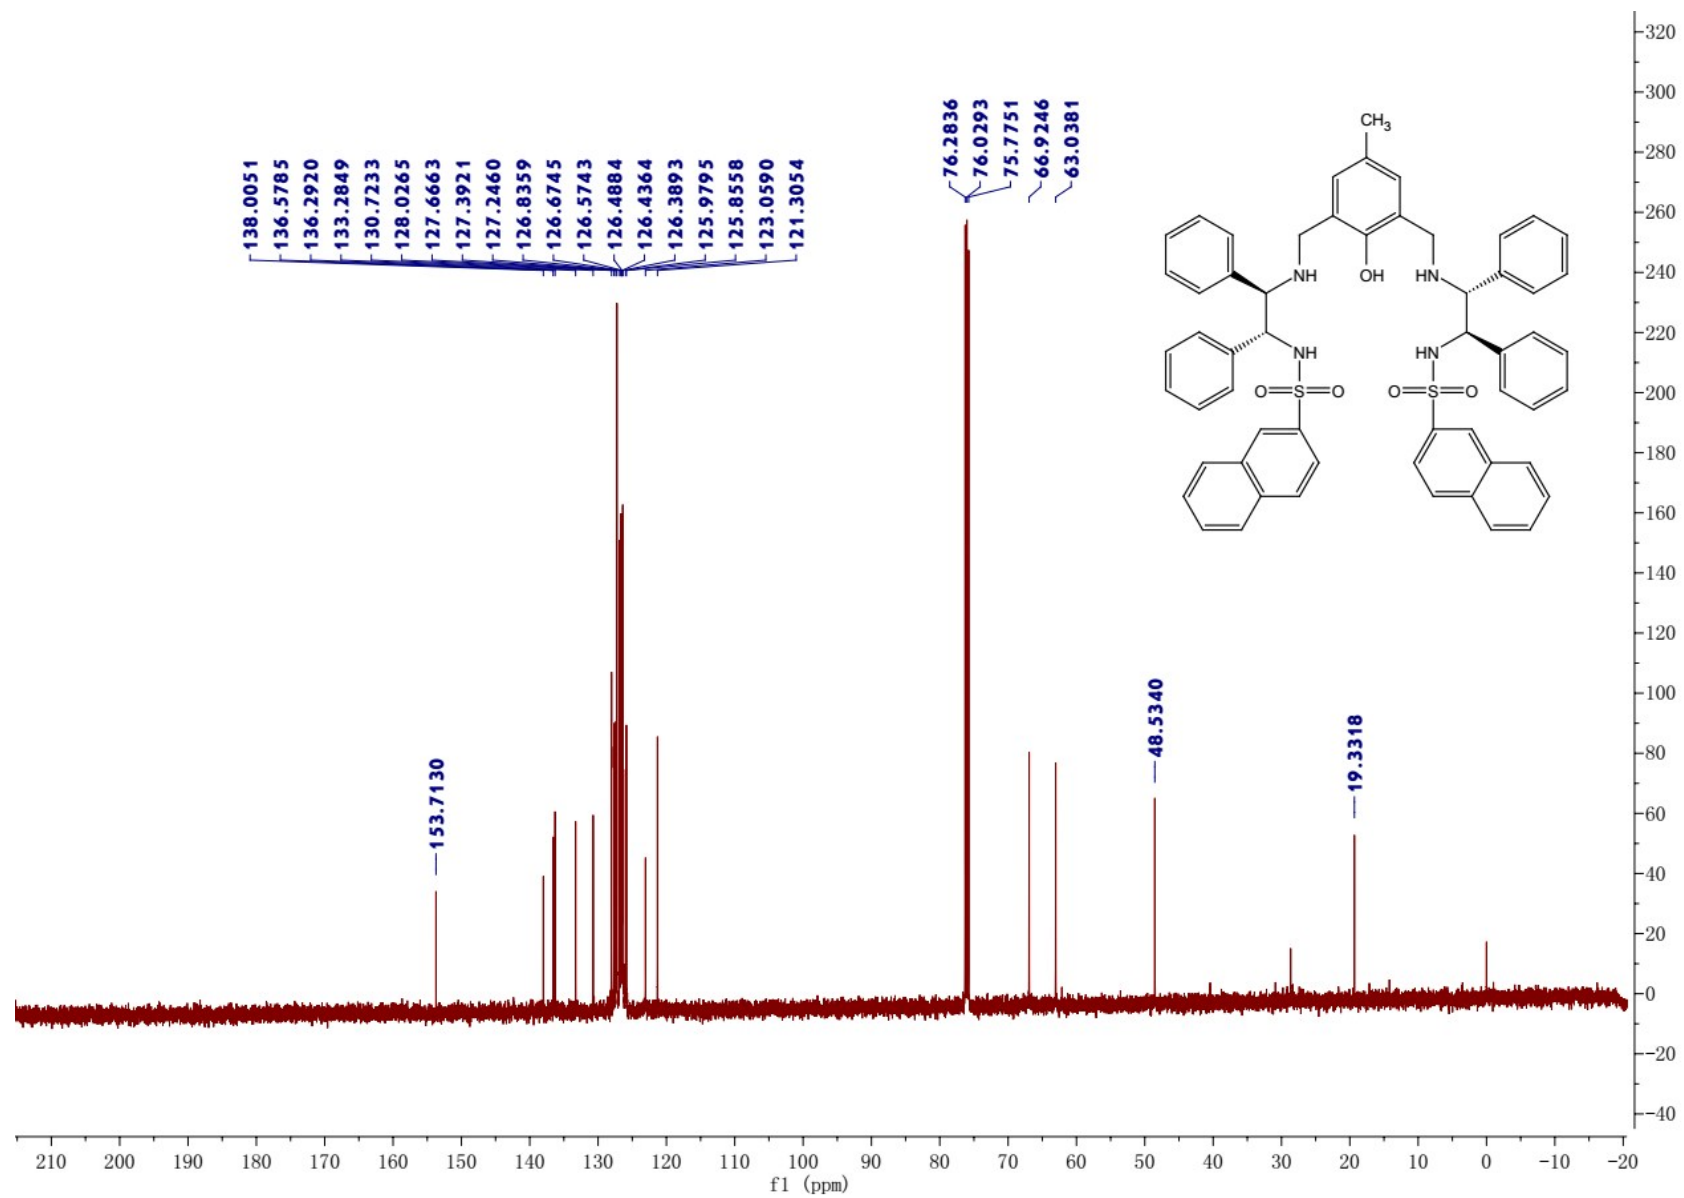

S46

L9

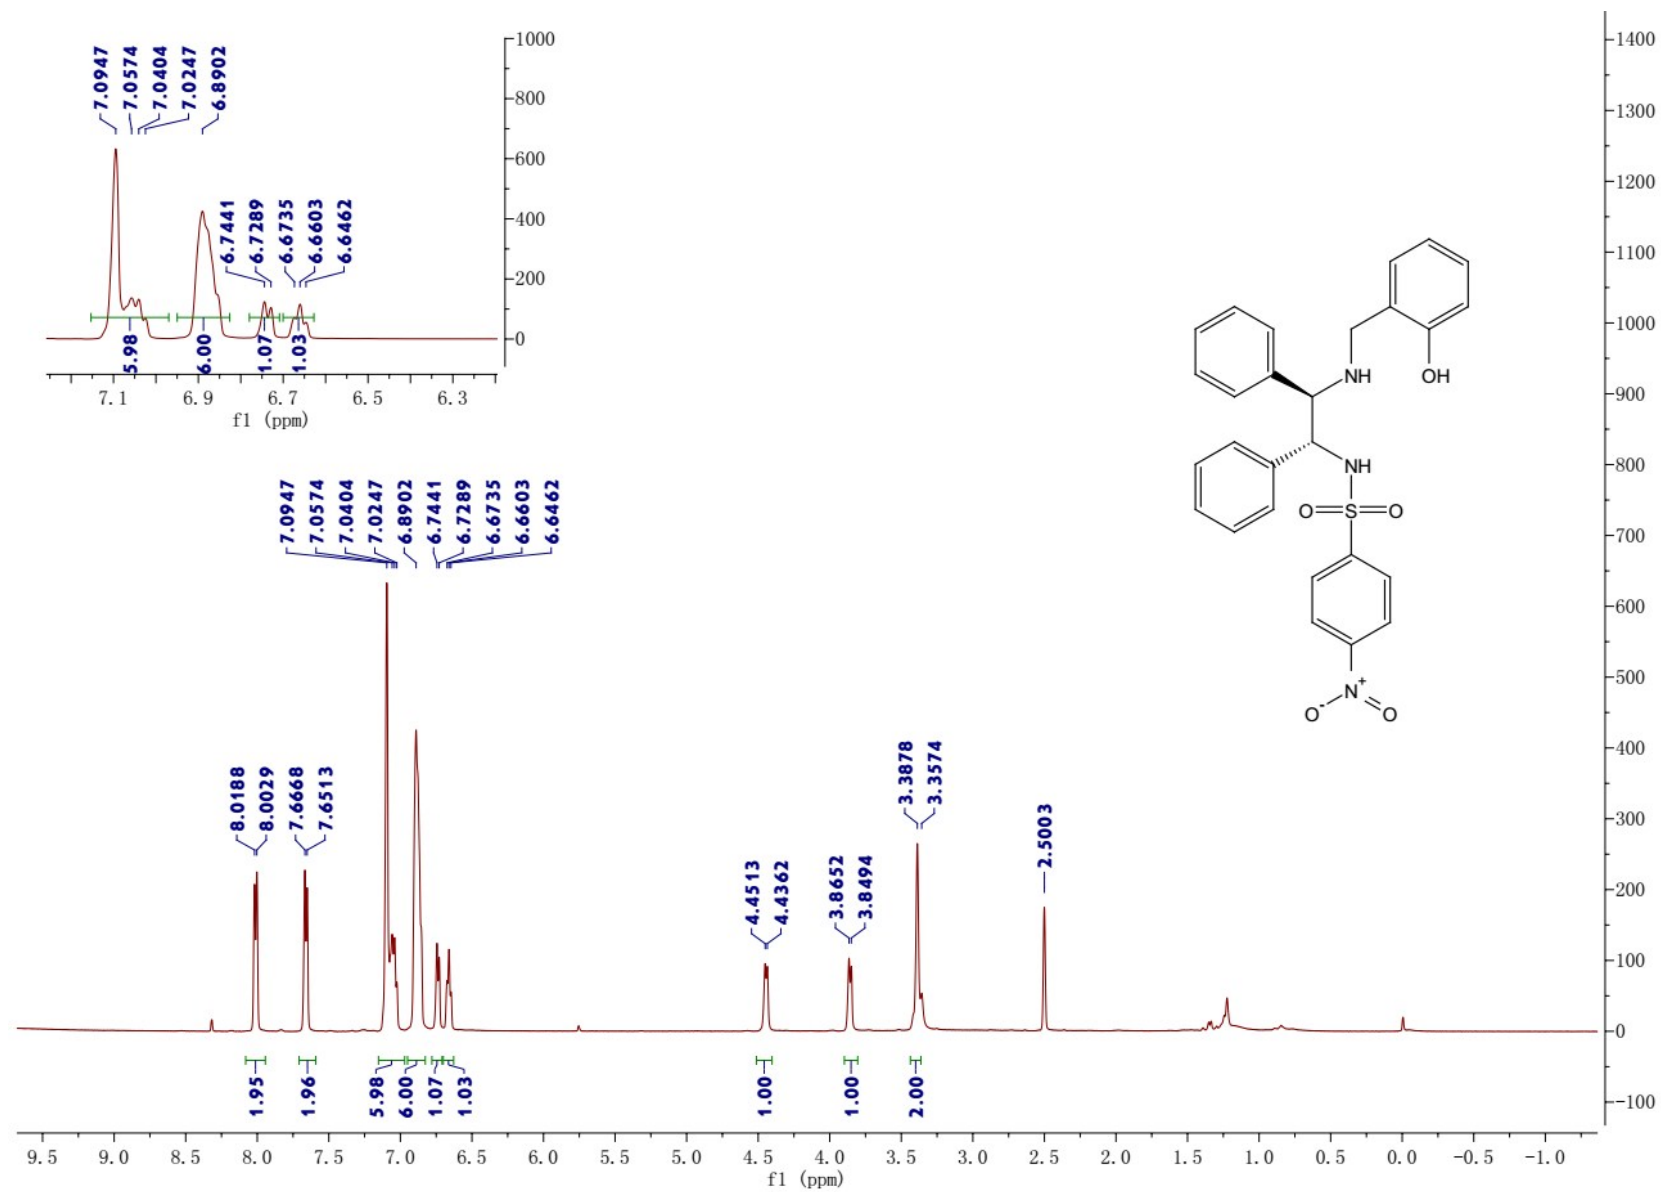

S47

L9

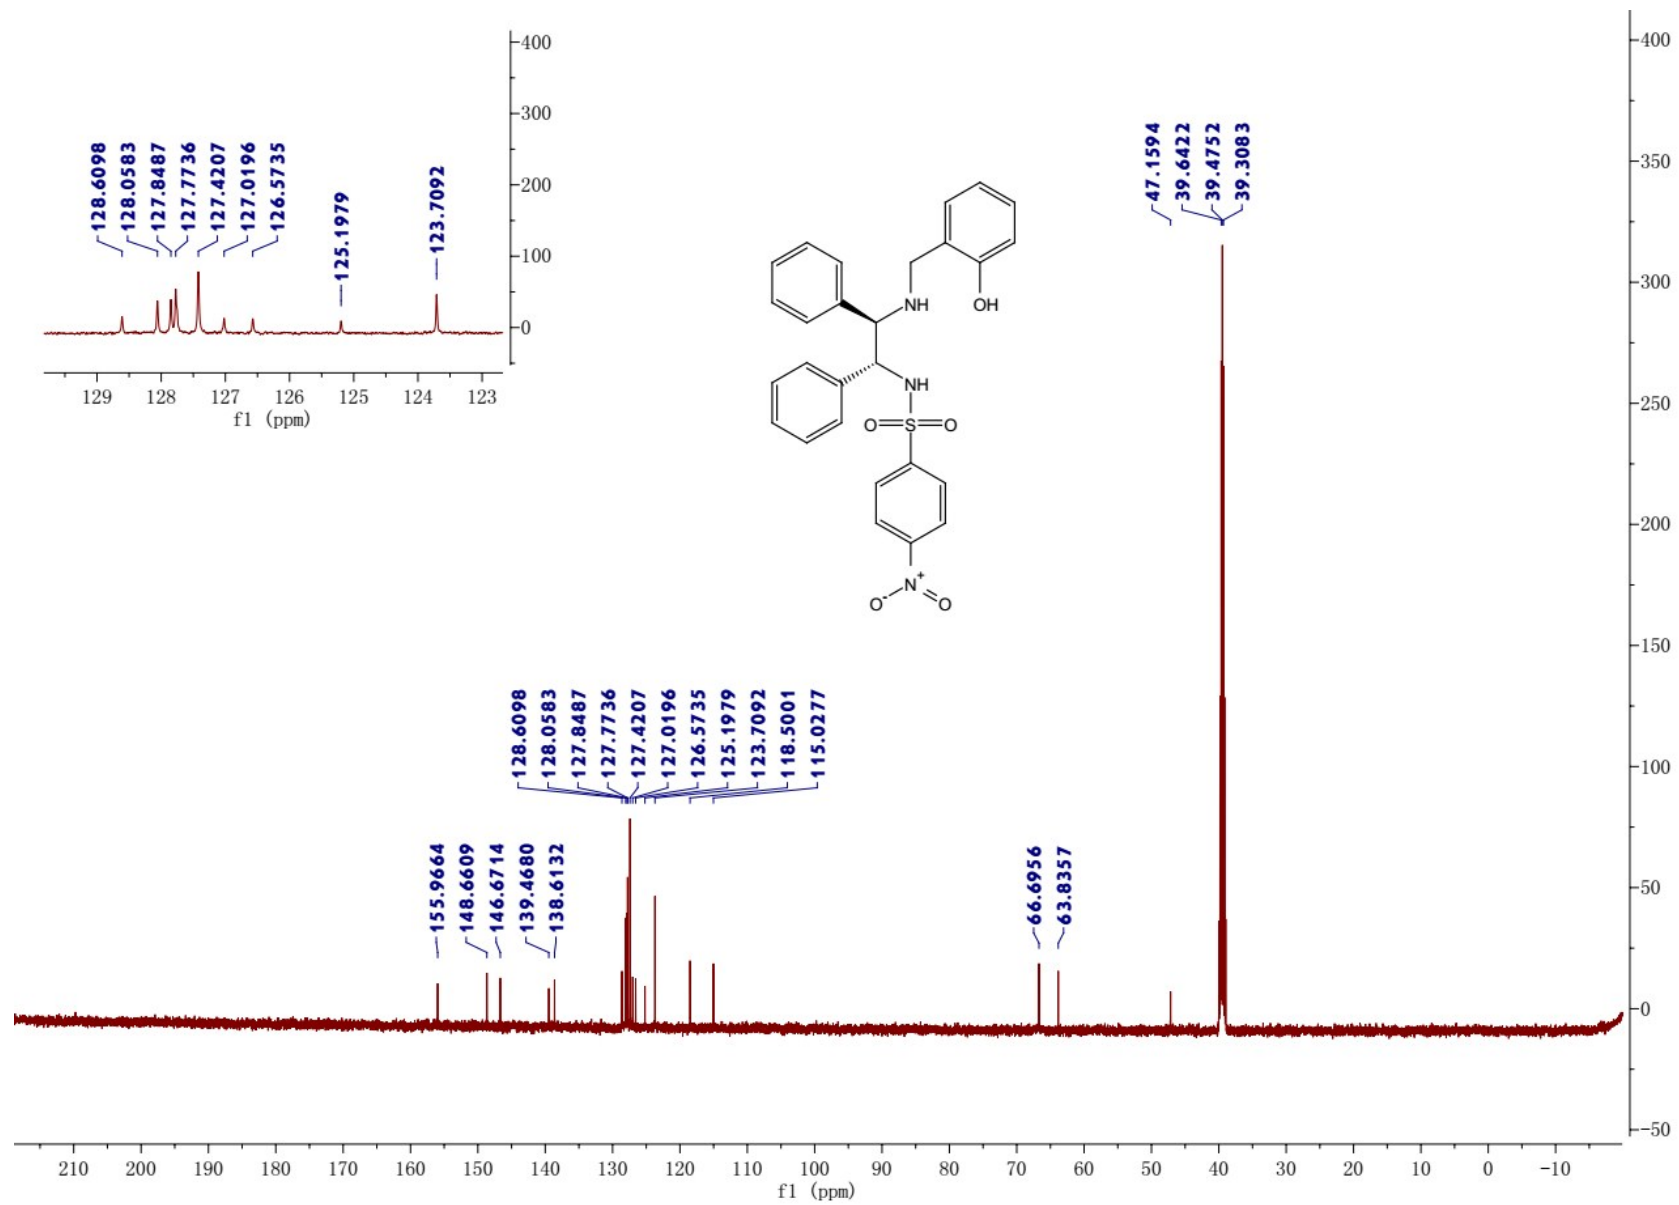

S48



L10

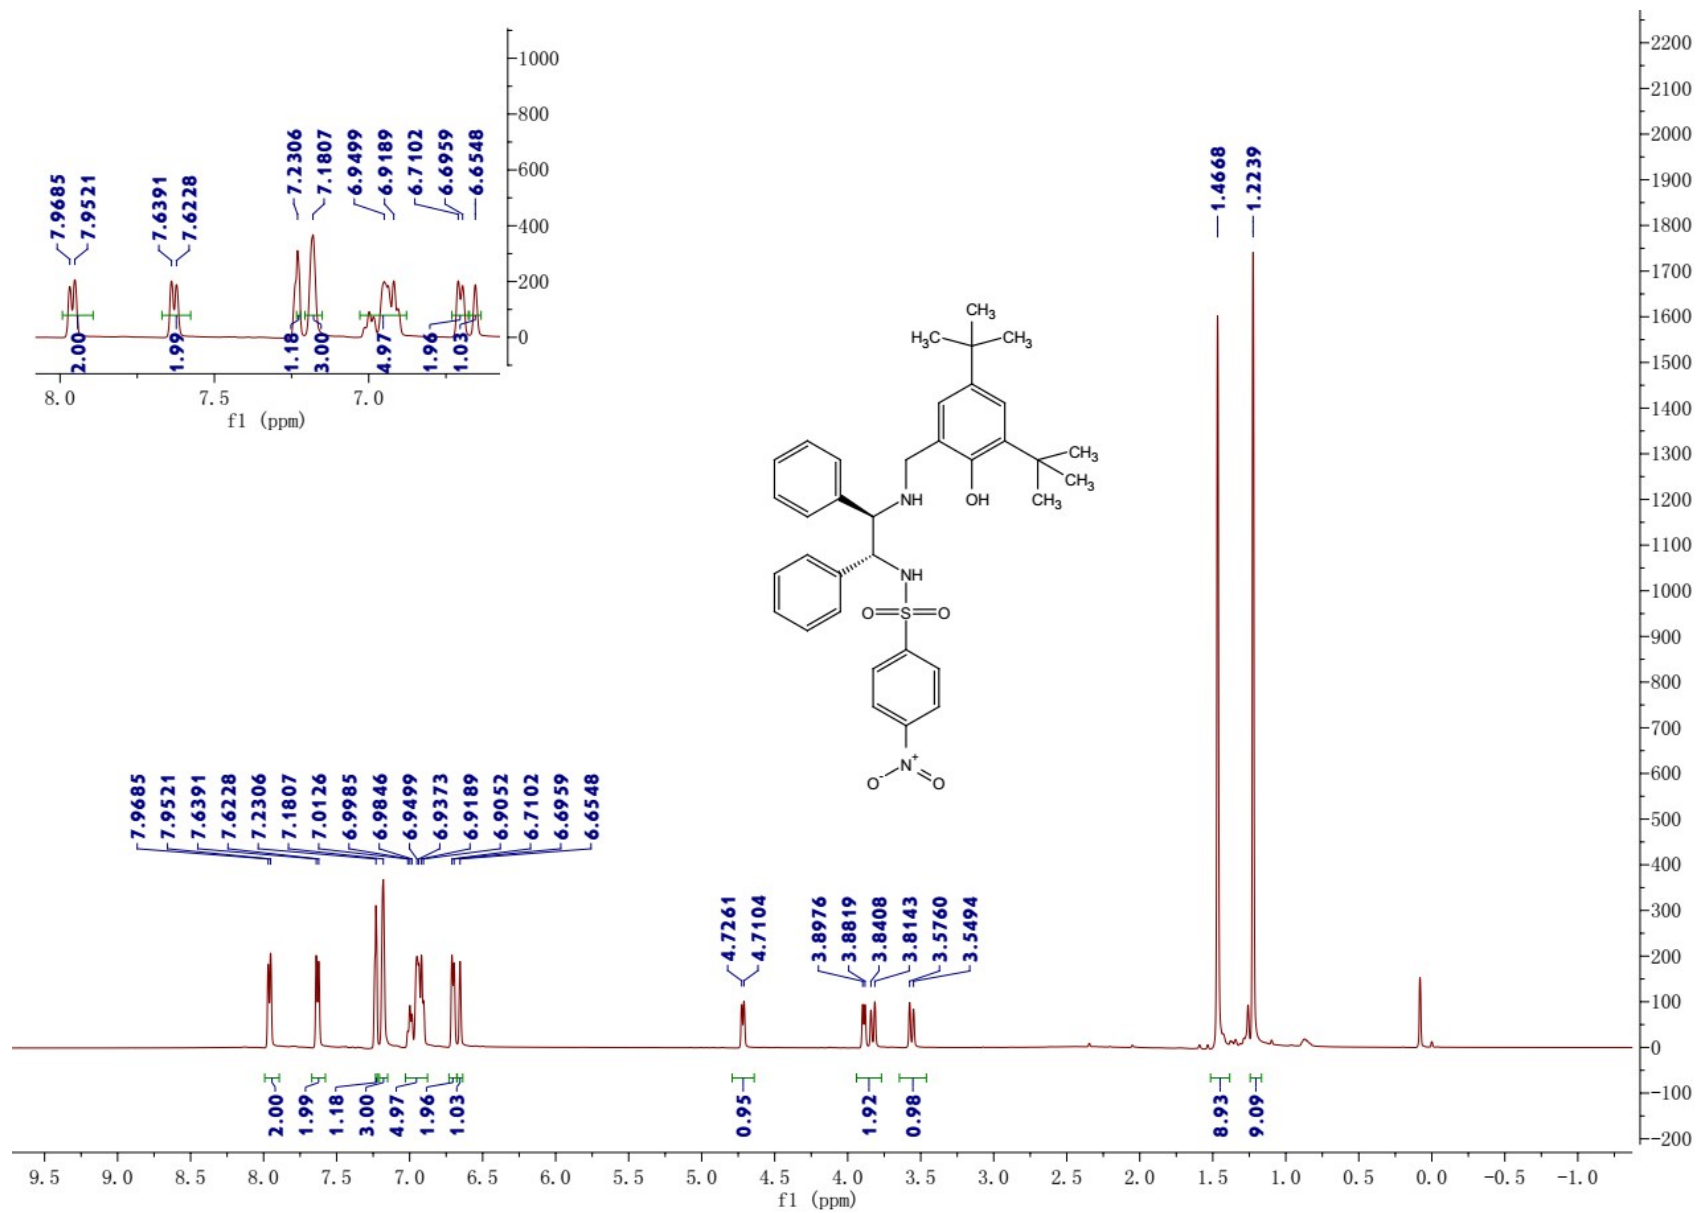

L10

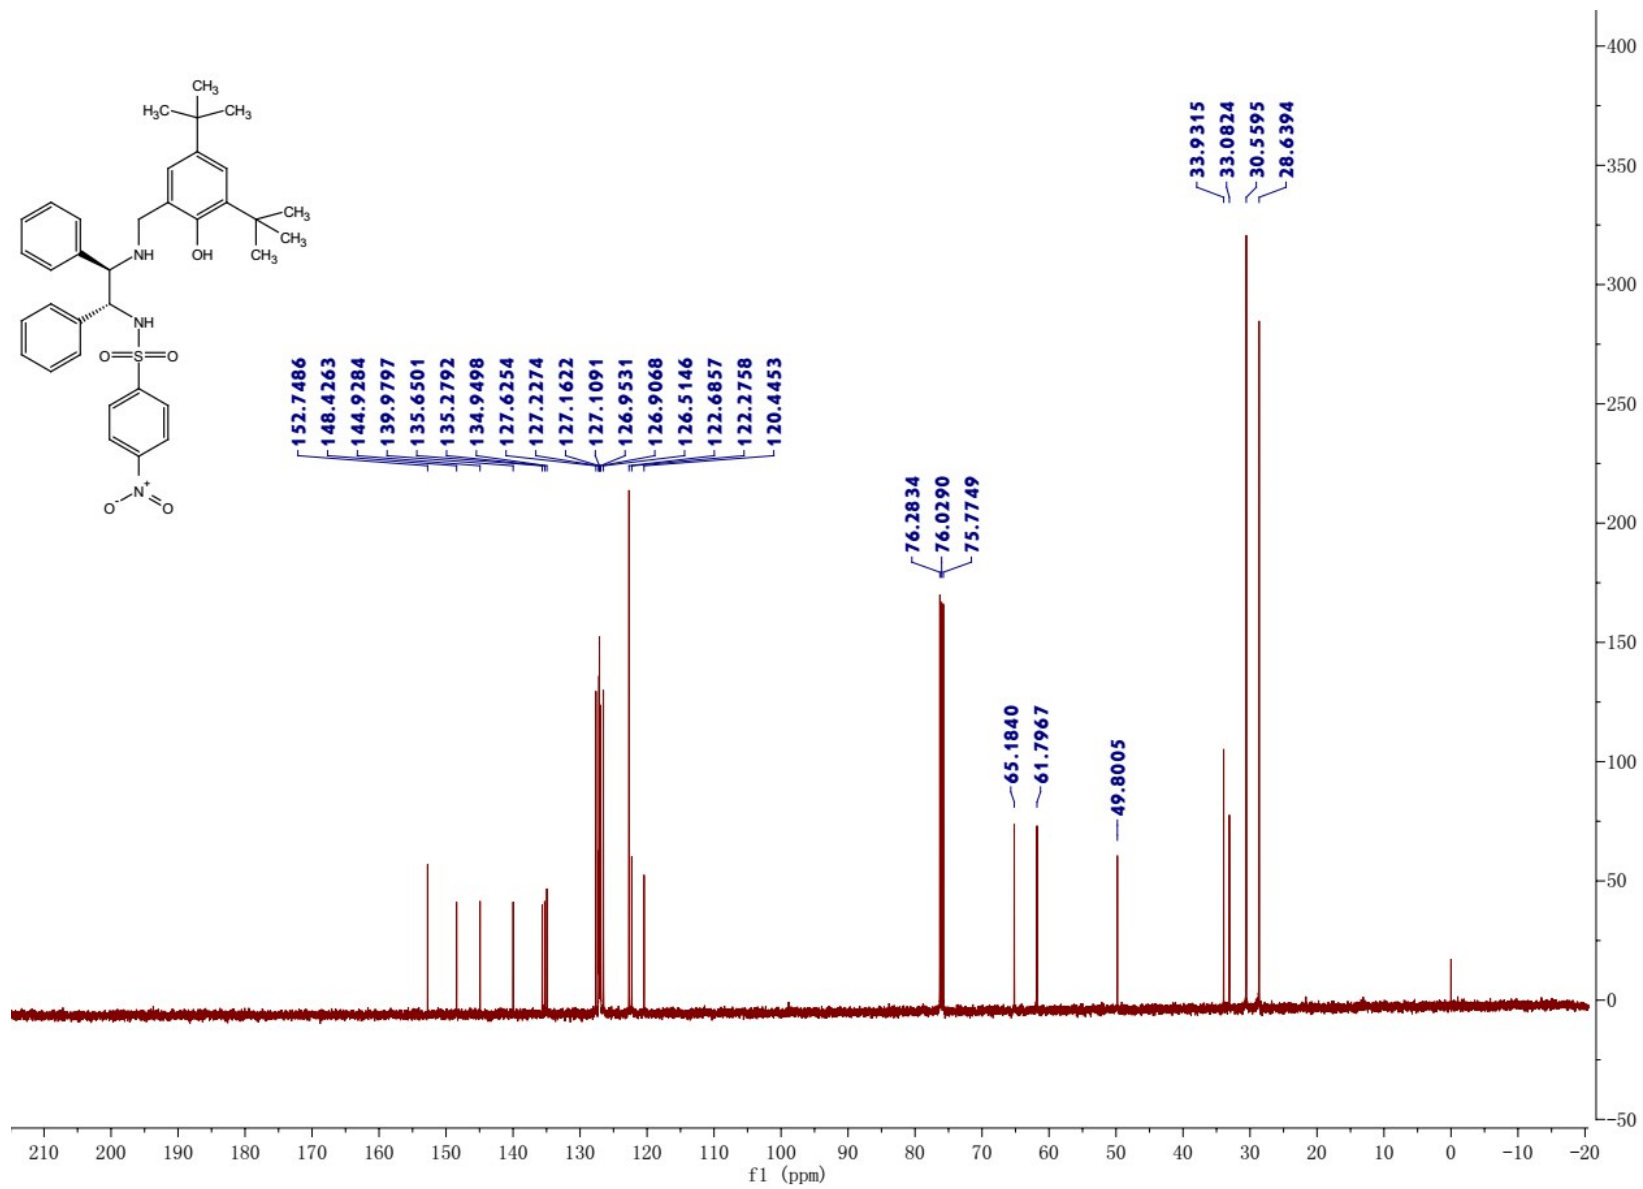

S50

2a

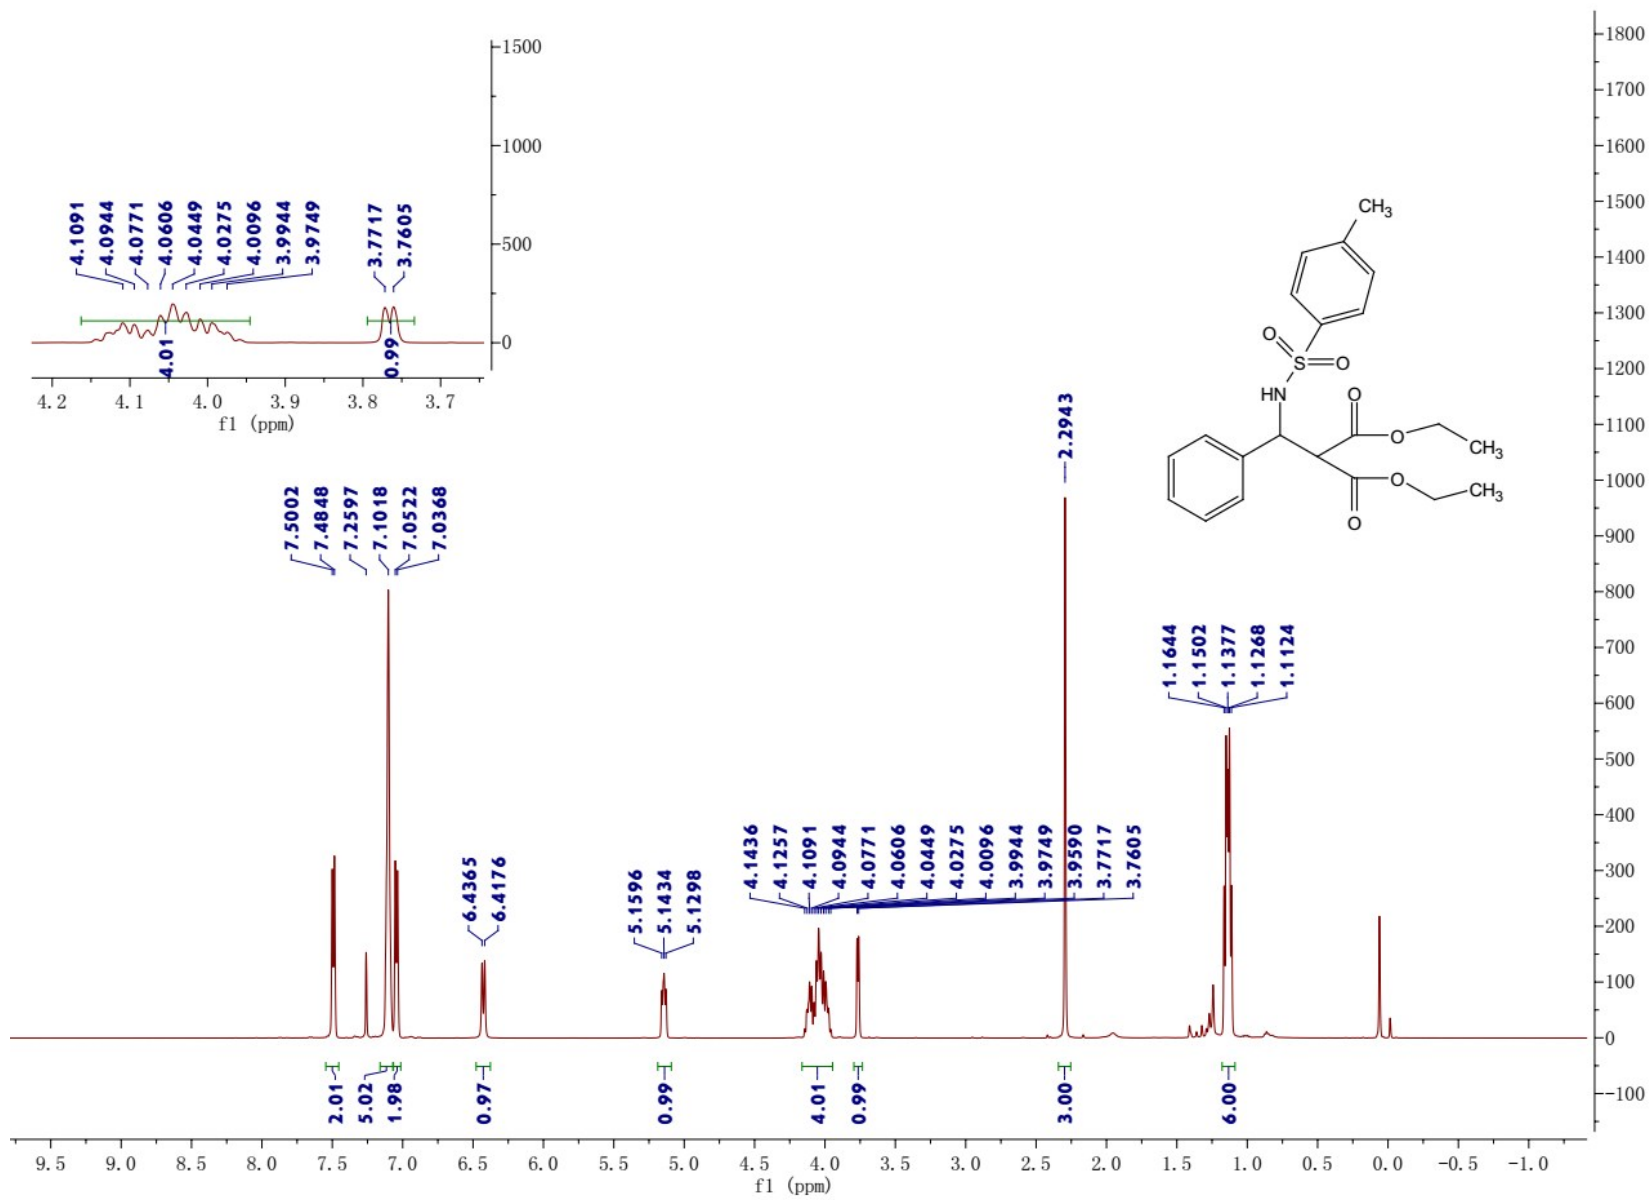

S51

2a

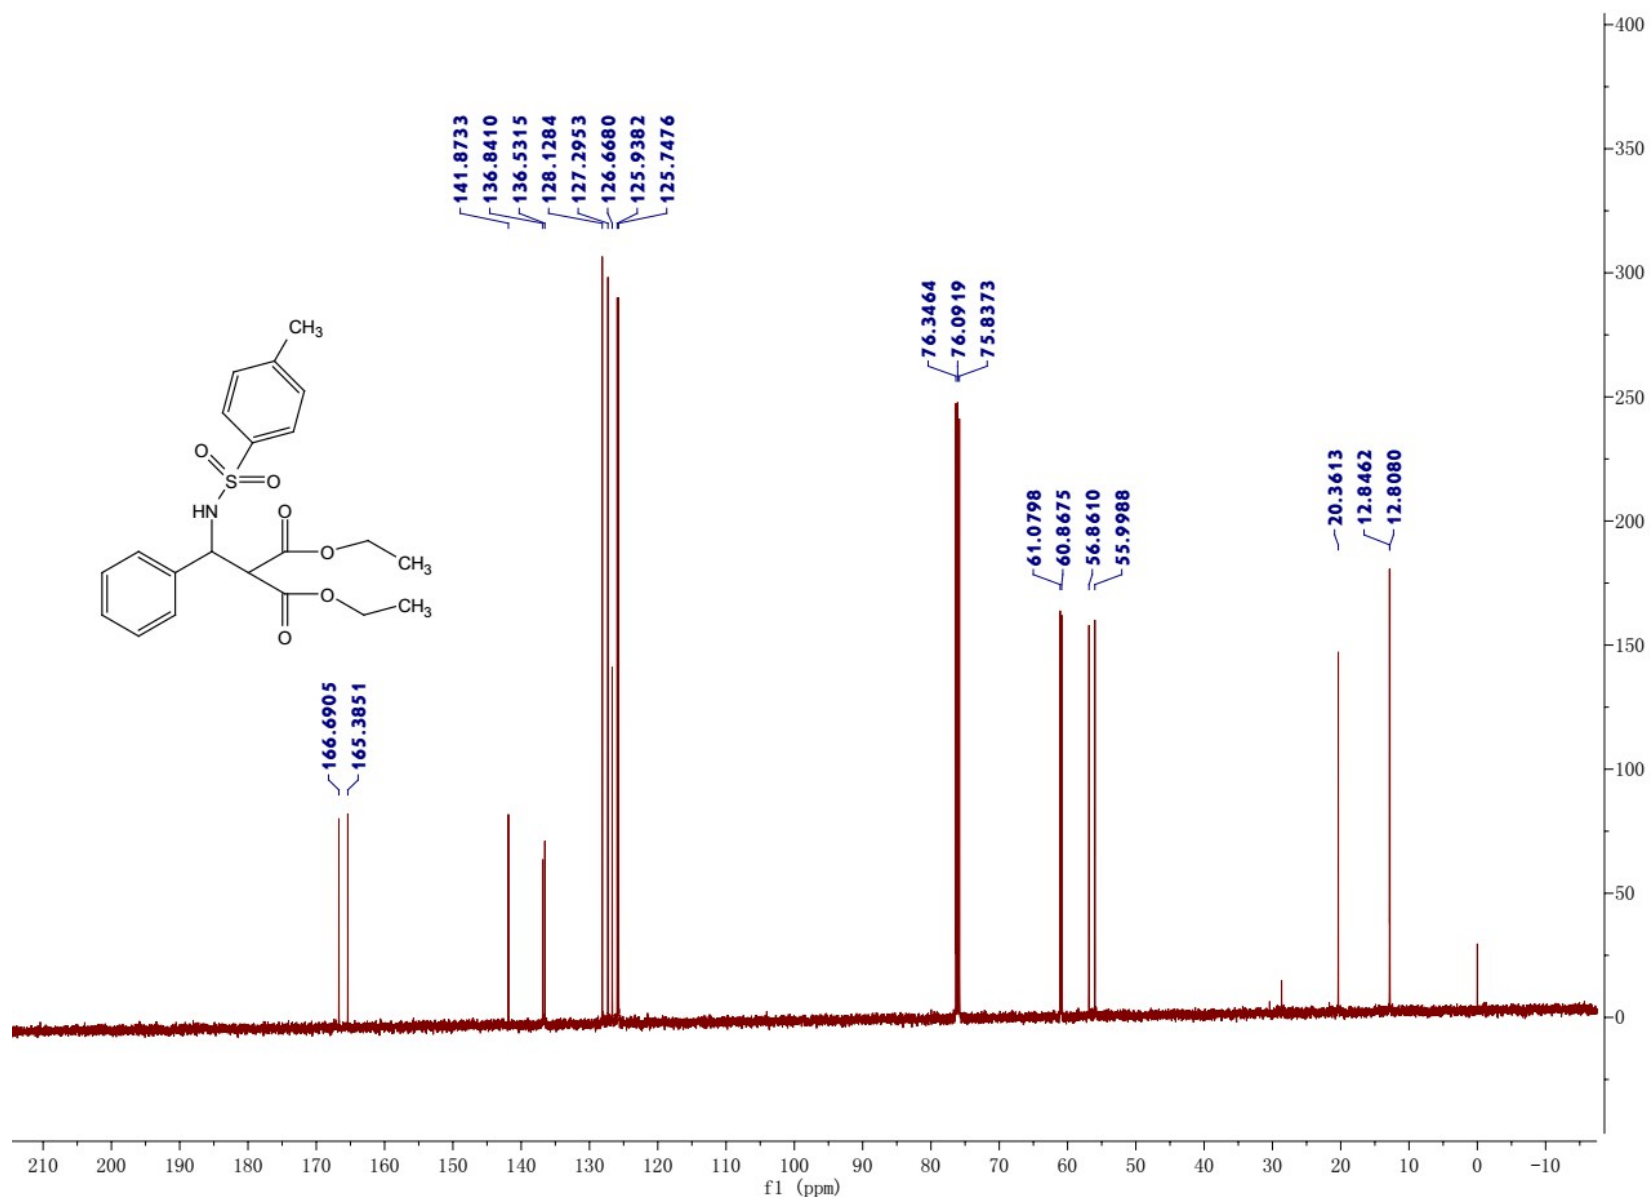

S52

2b

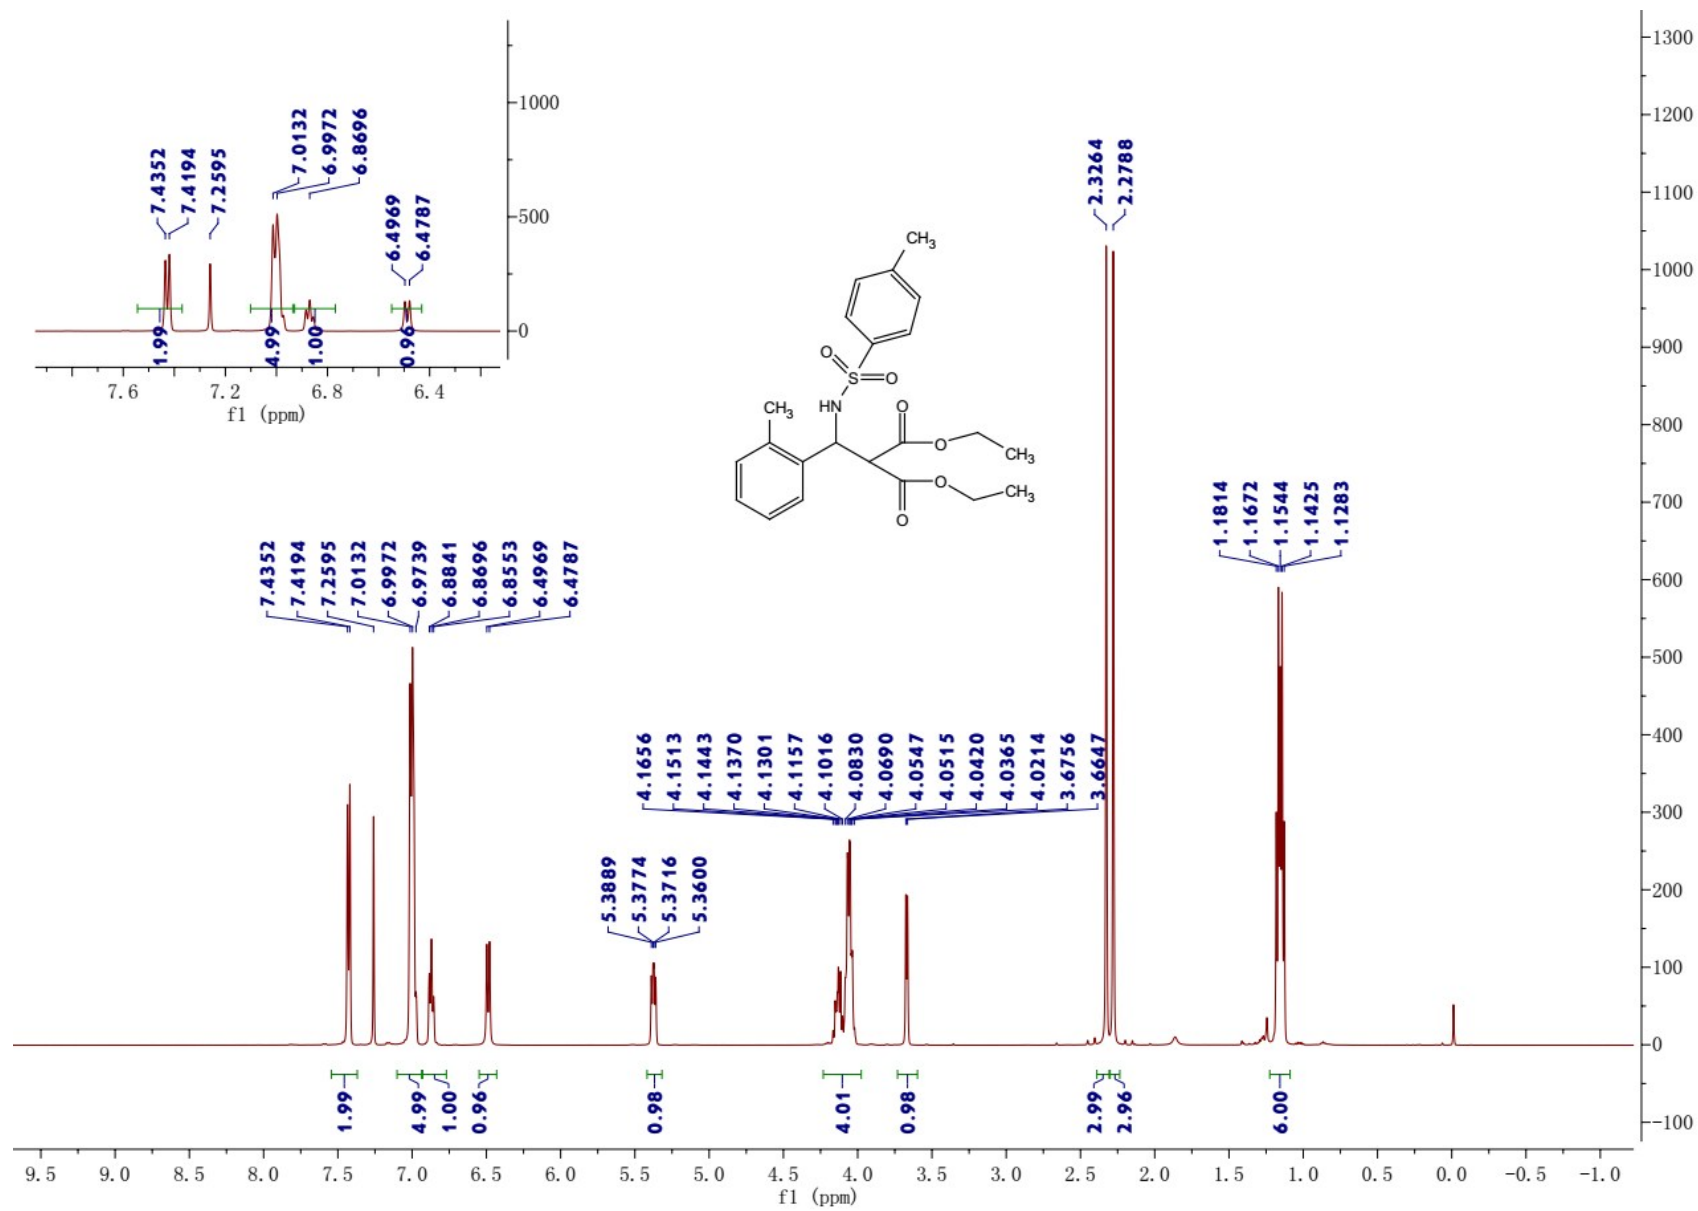

S53

2b

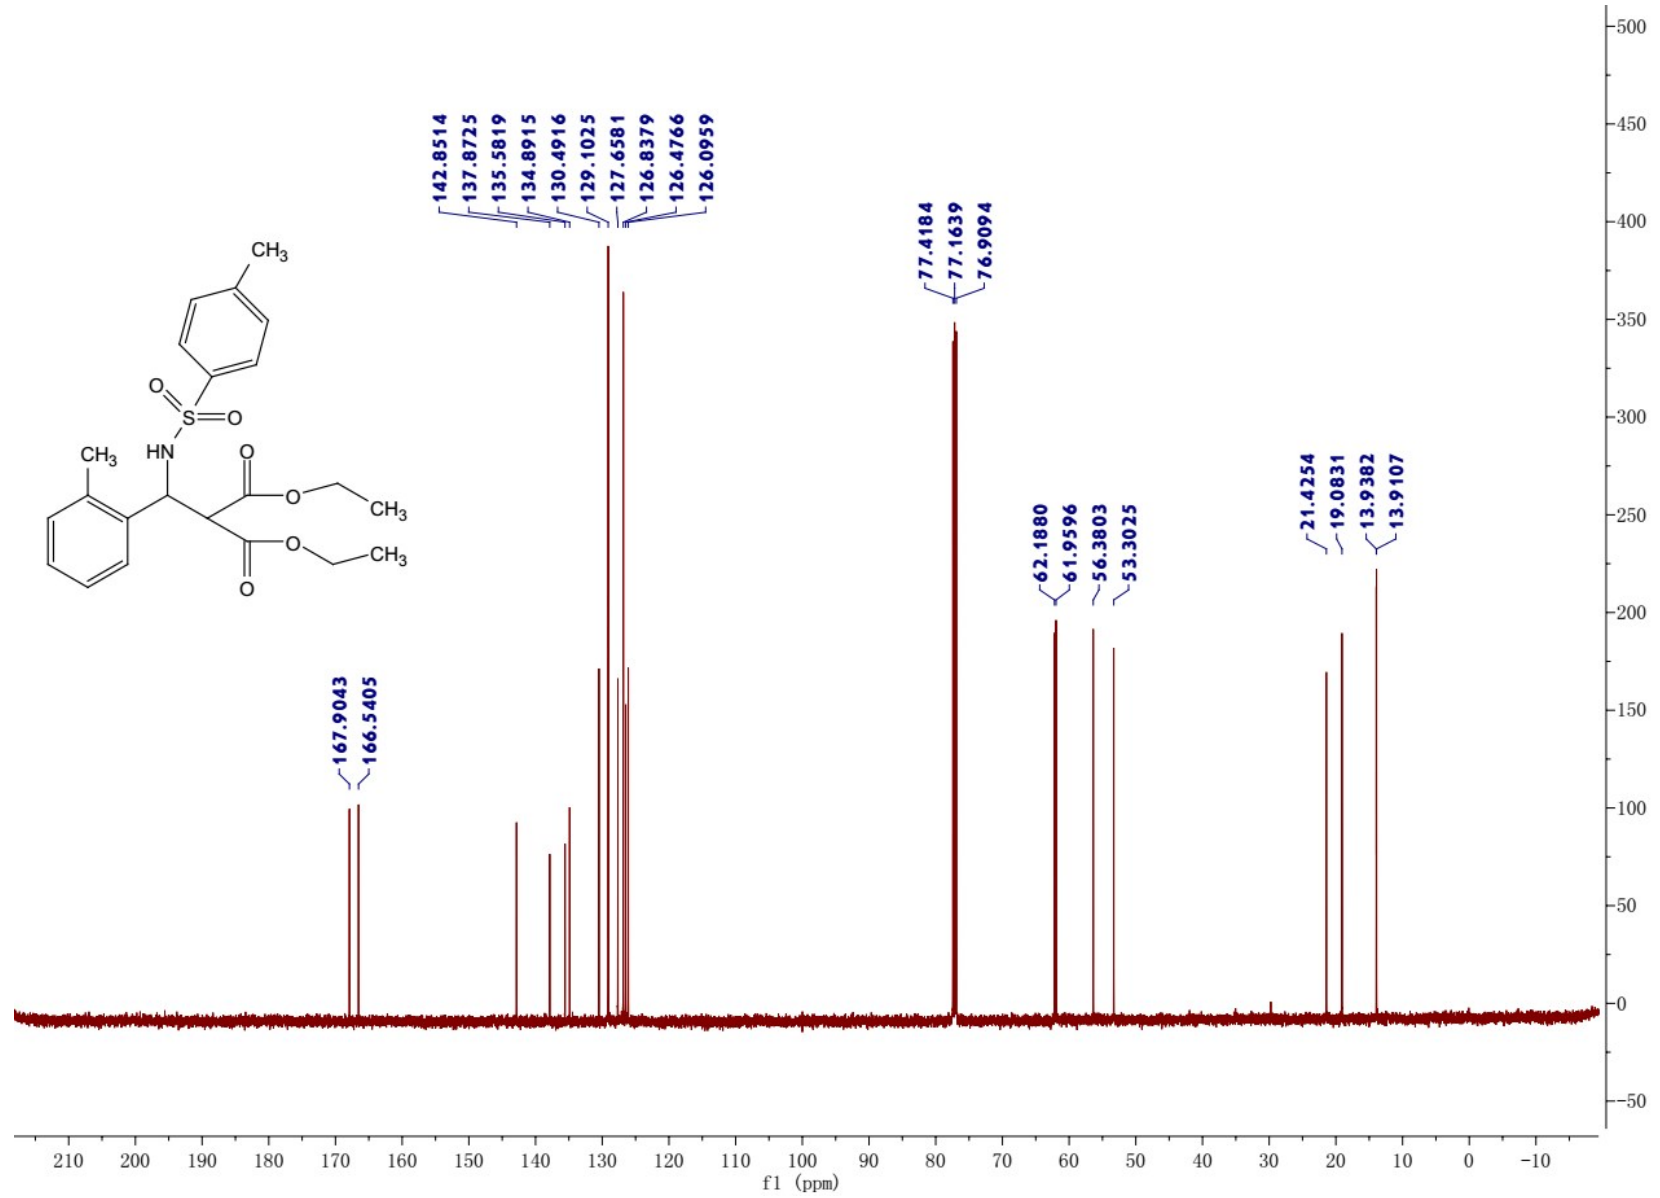

2c

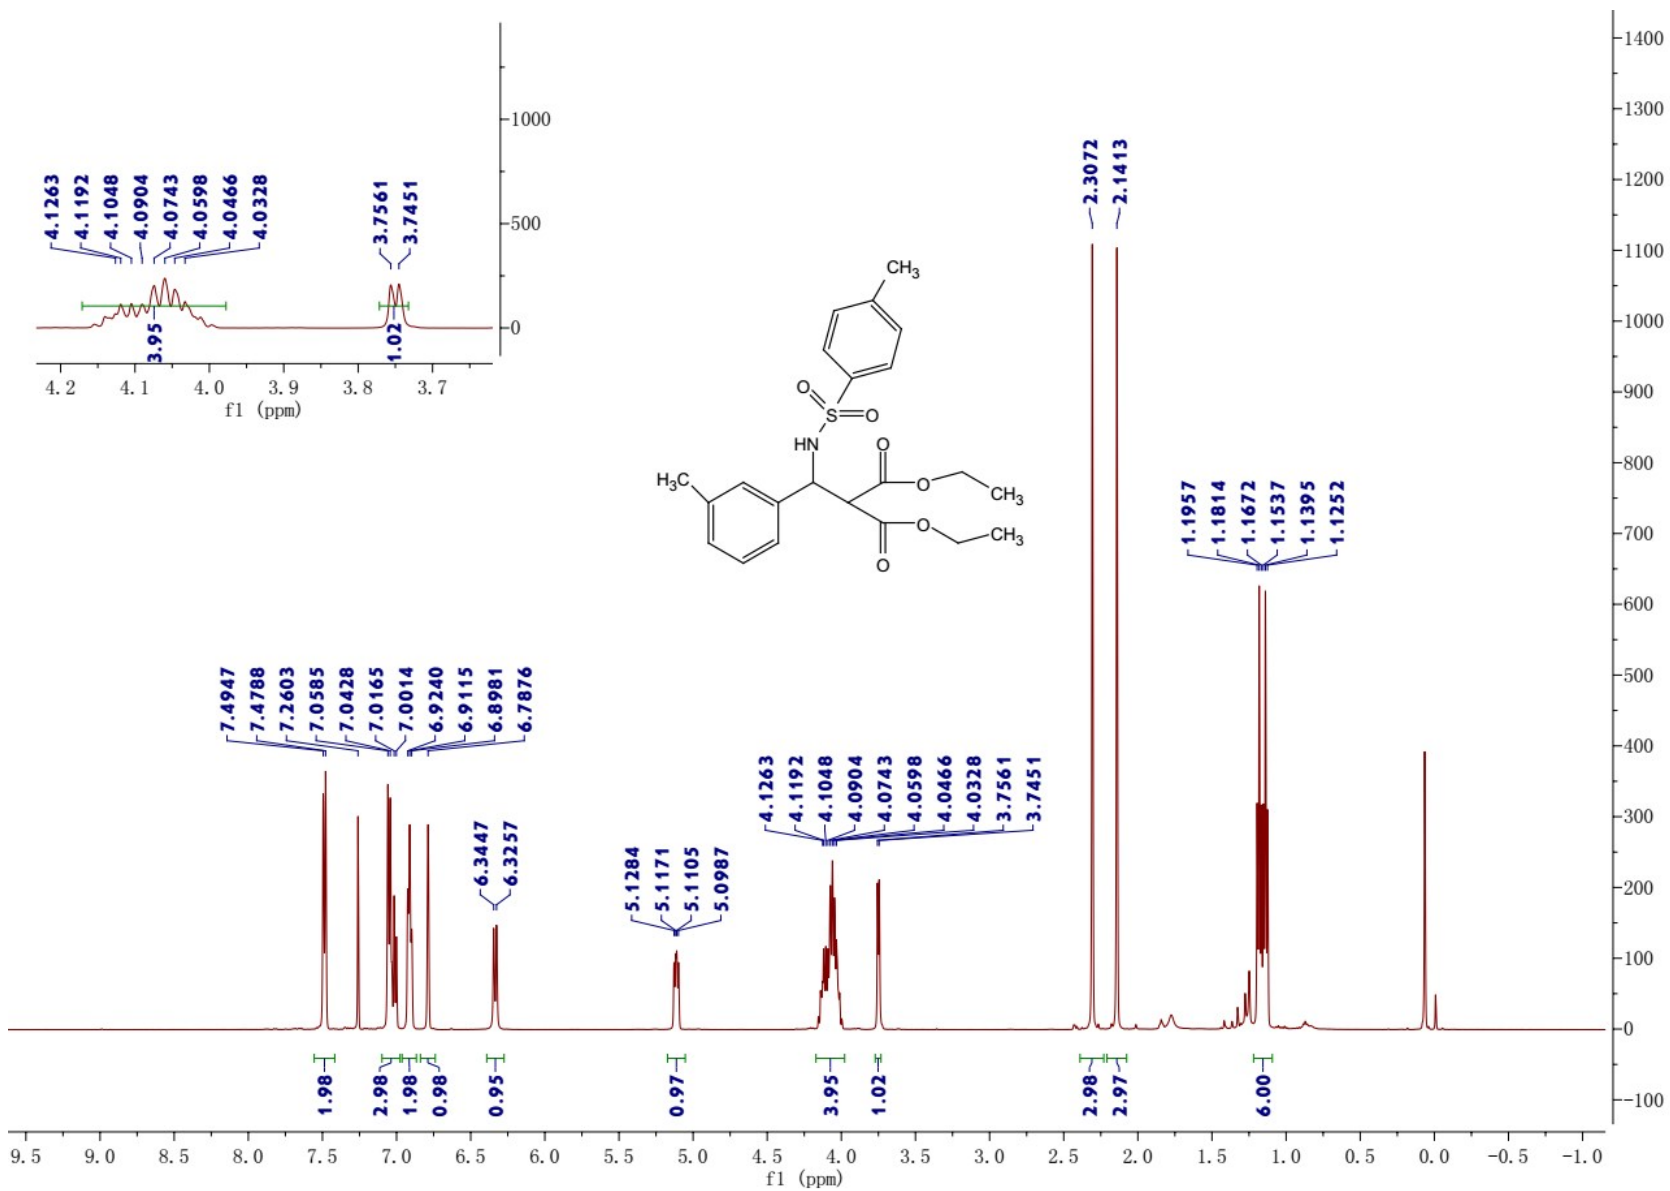

S55

2c

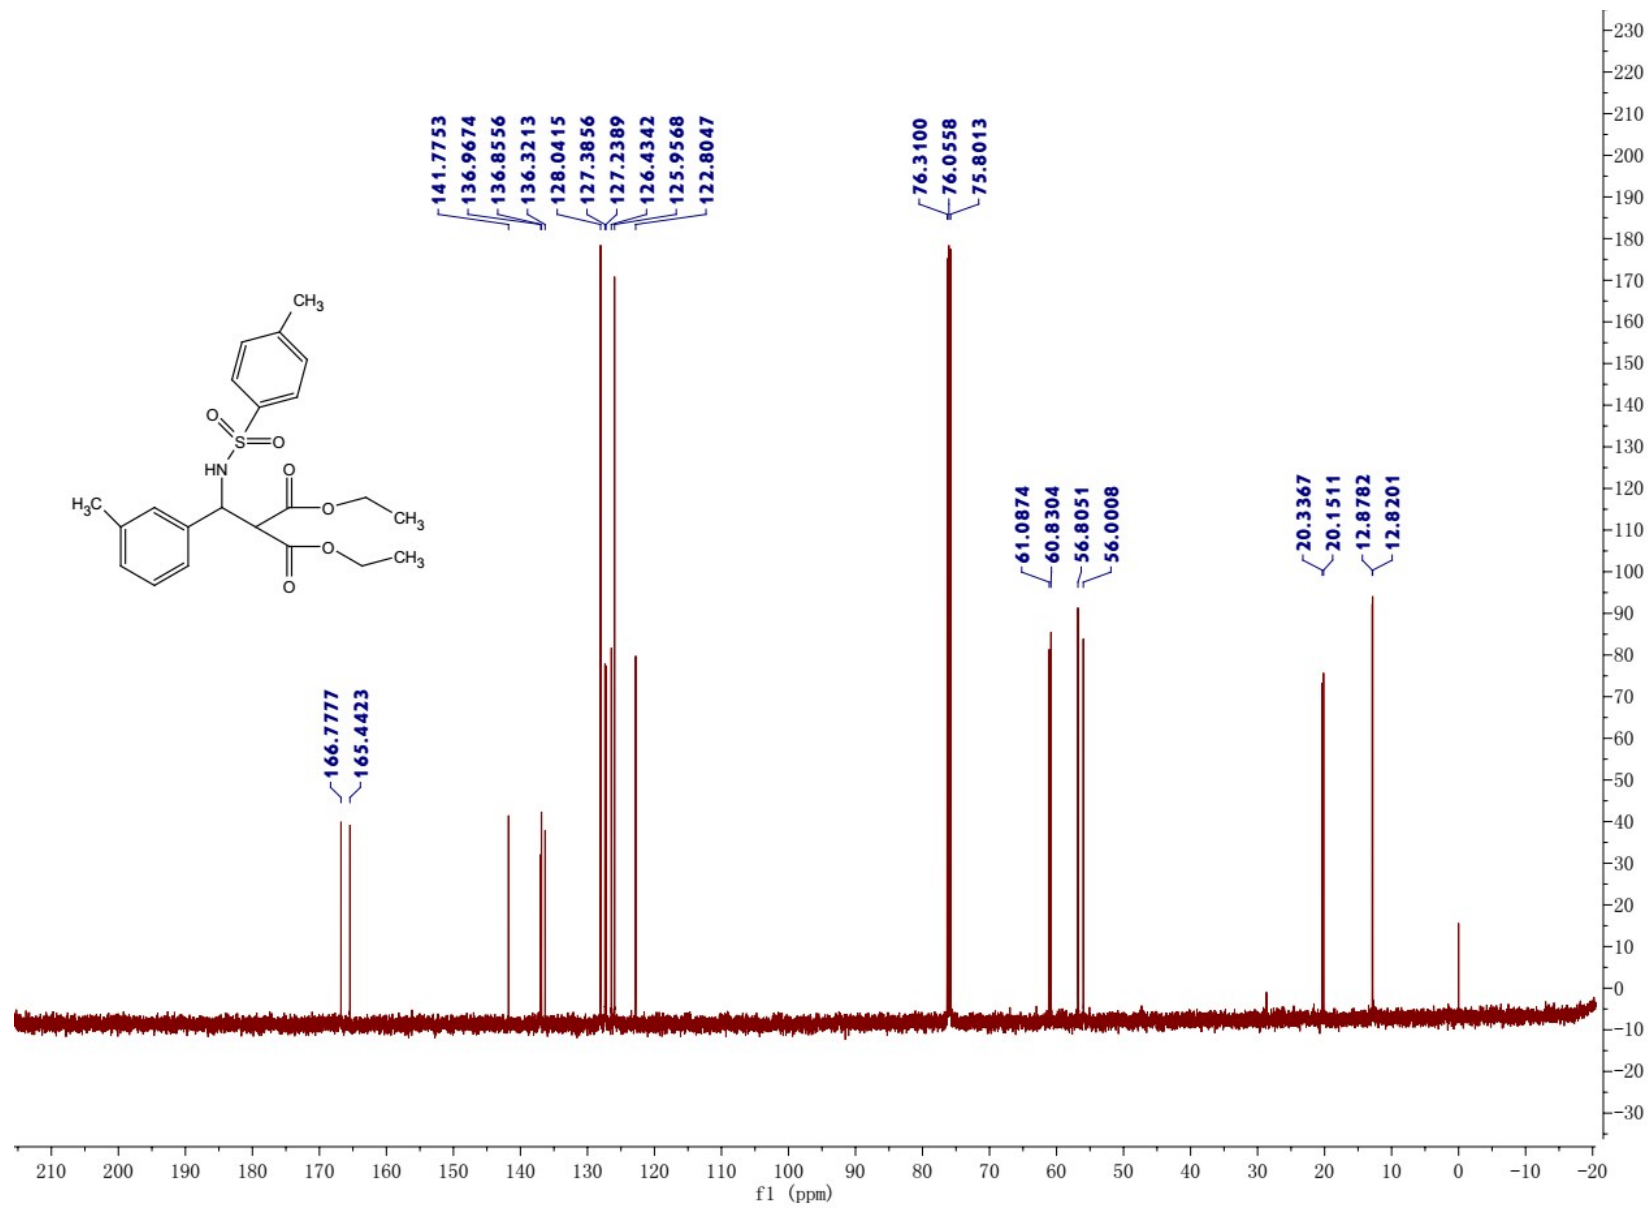

S56



2d

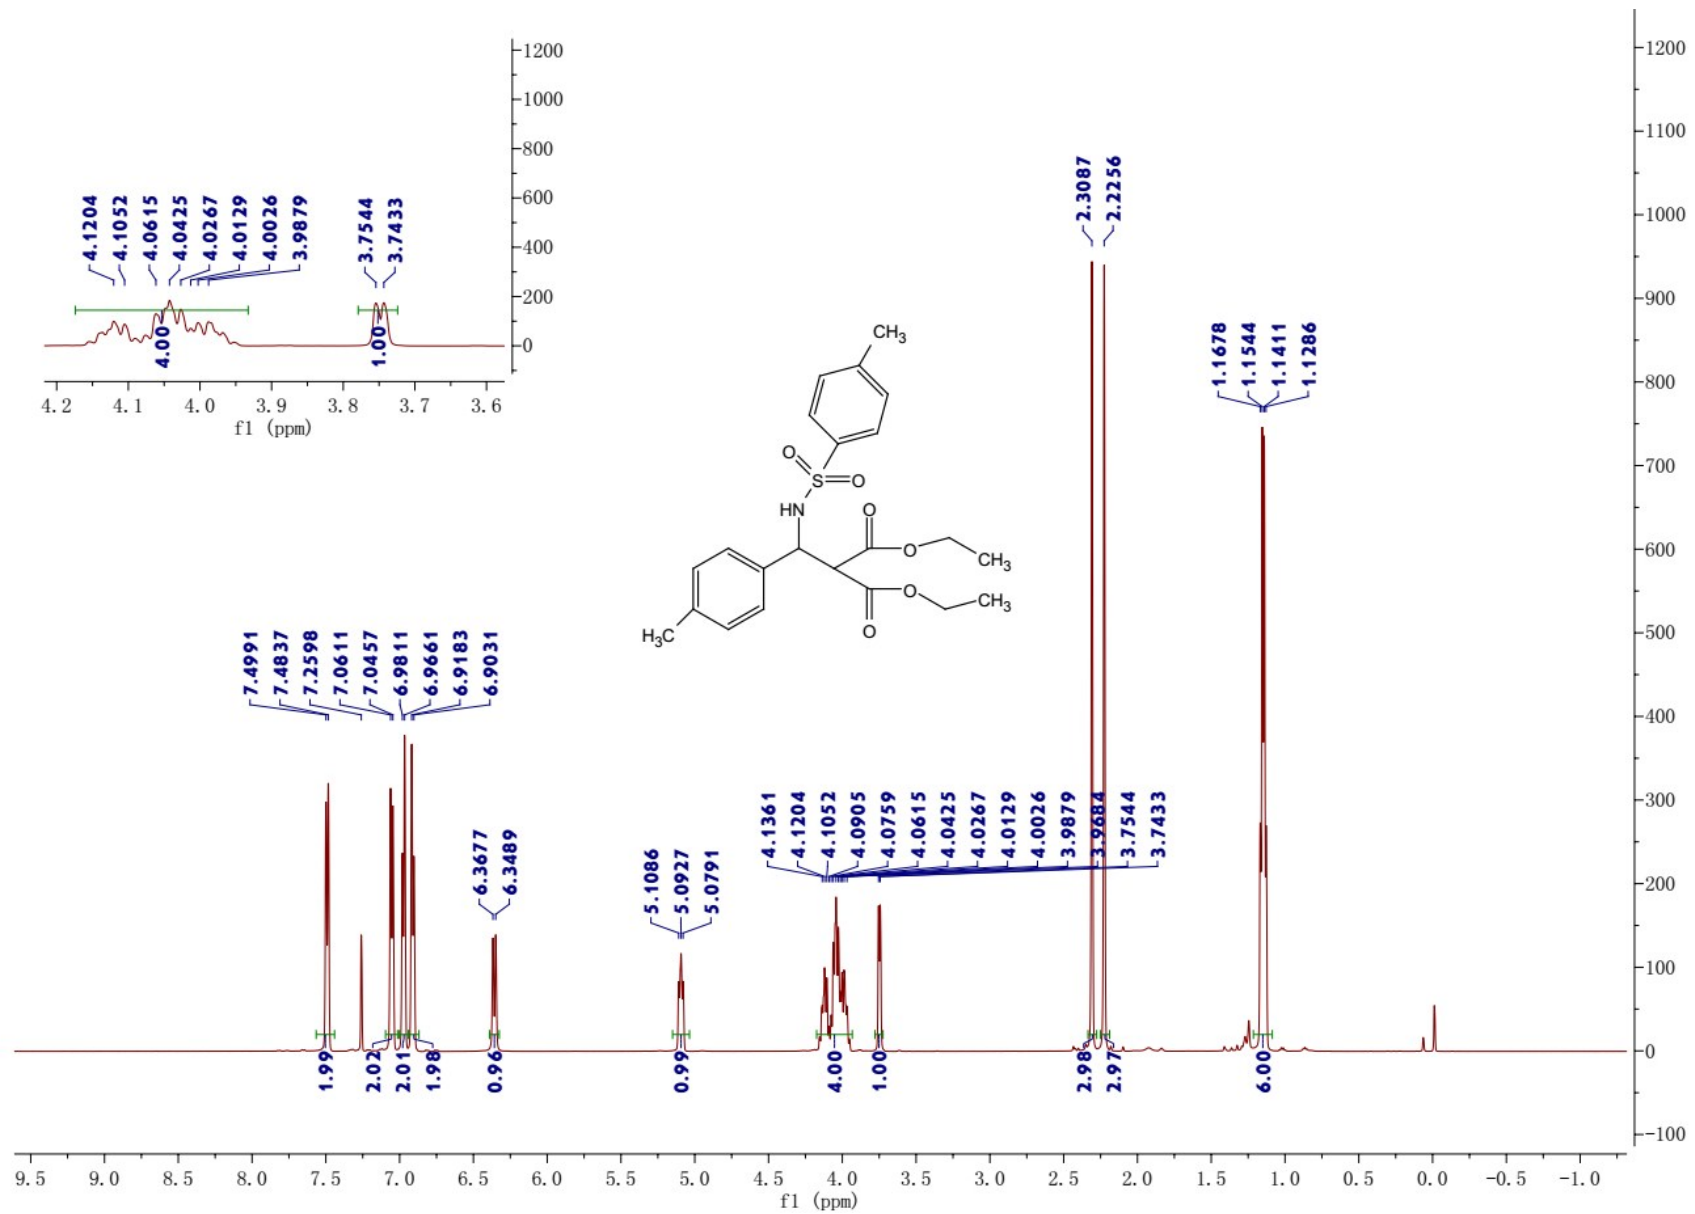

S57

2d

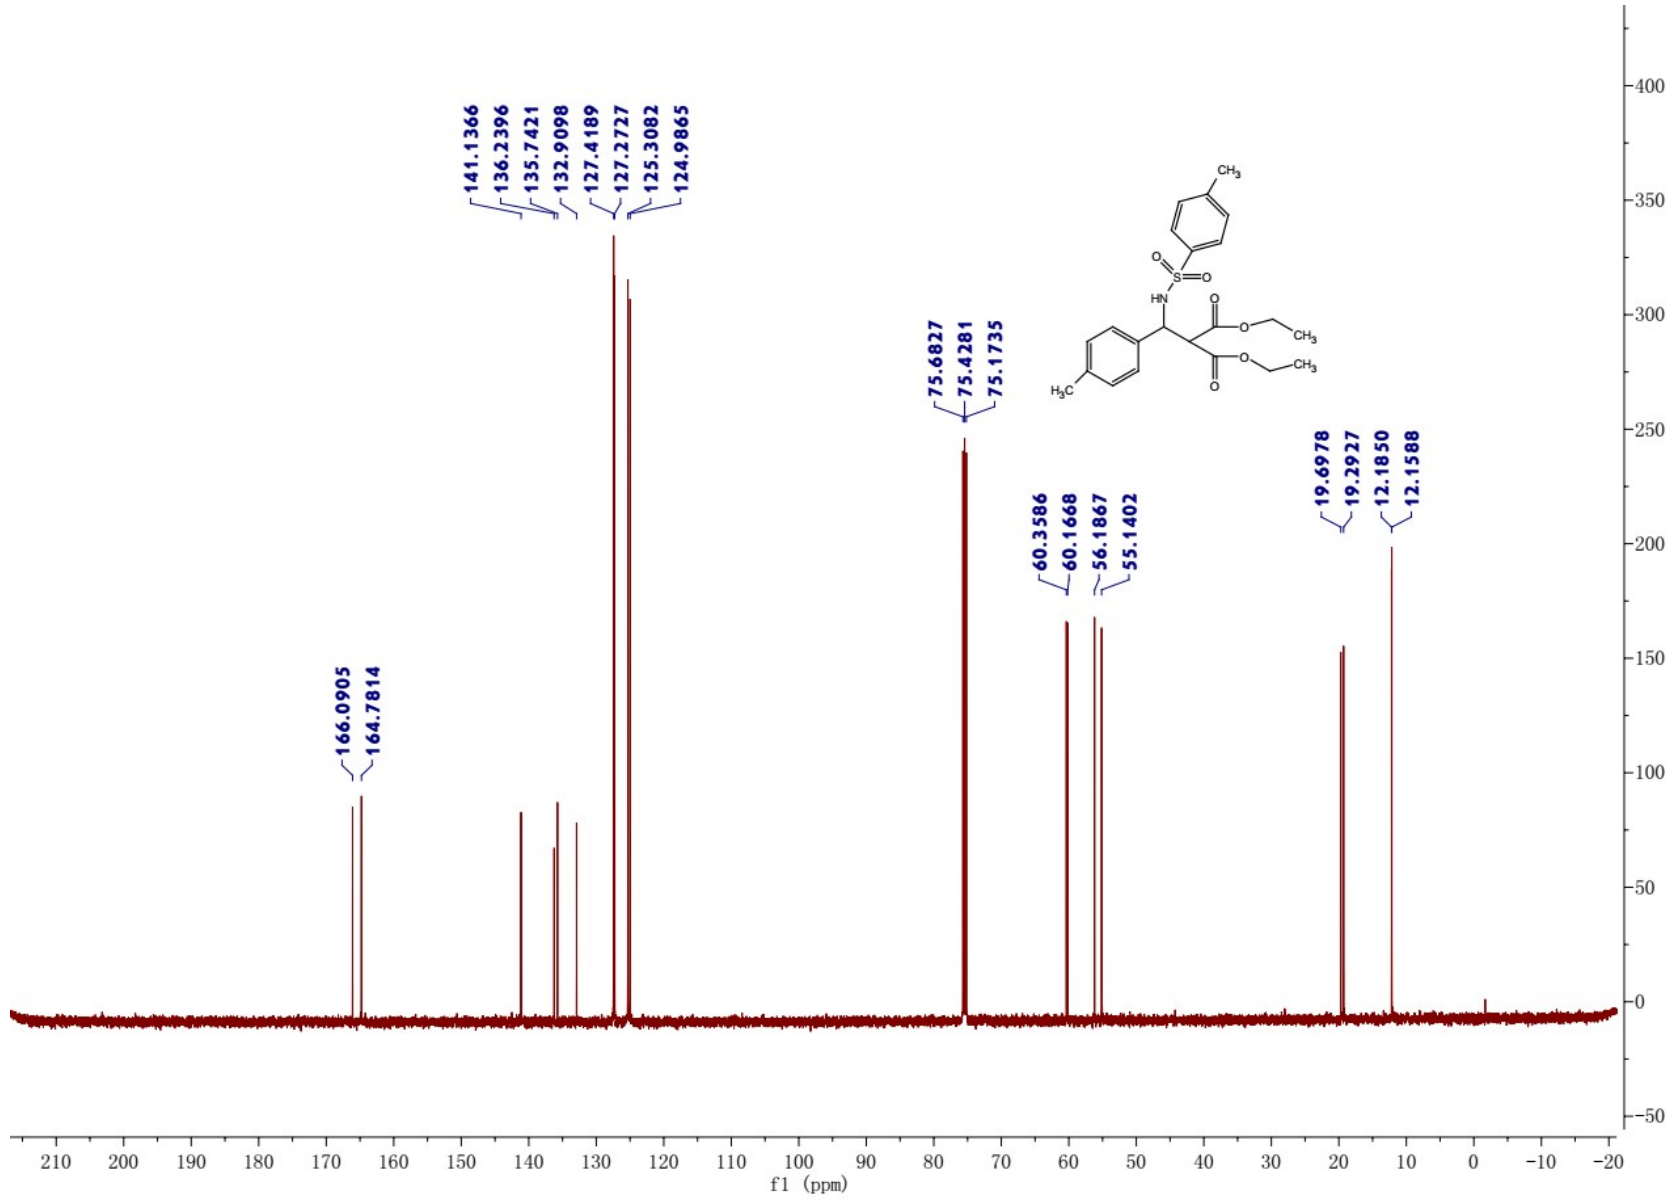

S58

2e

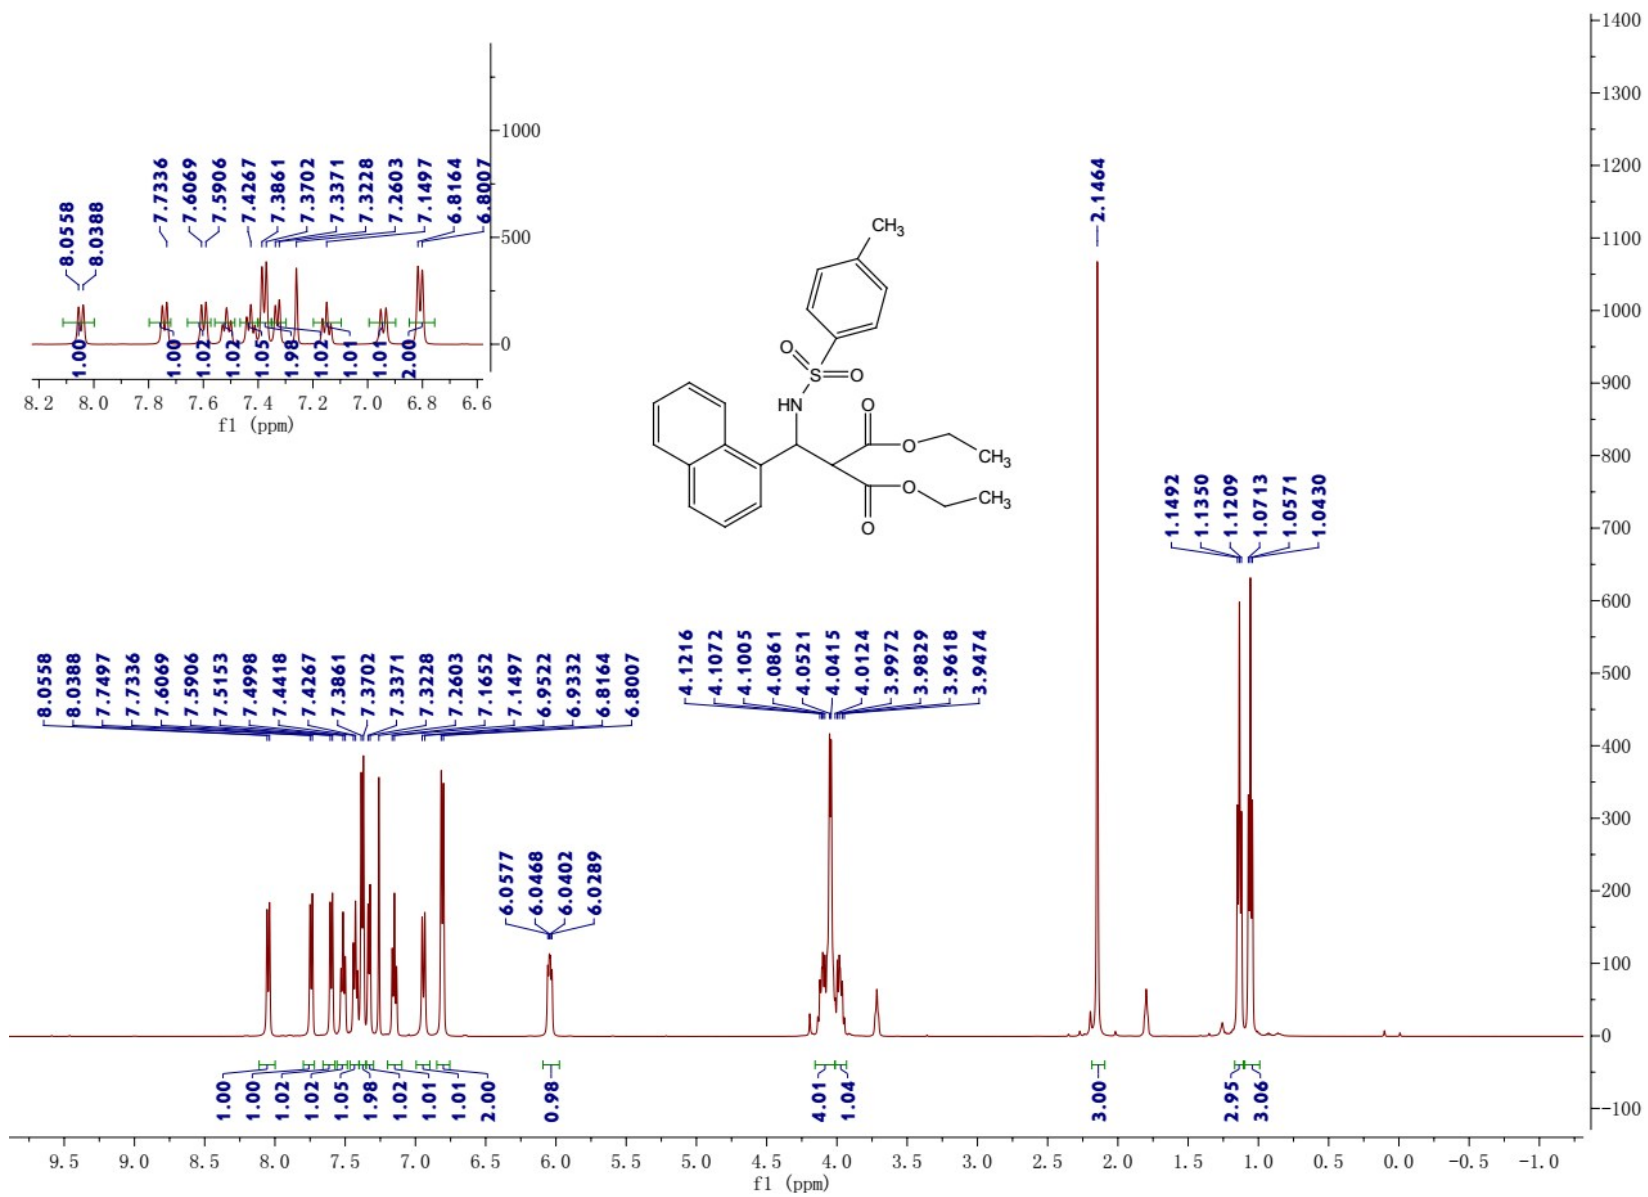

S59

2e

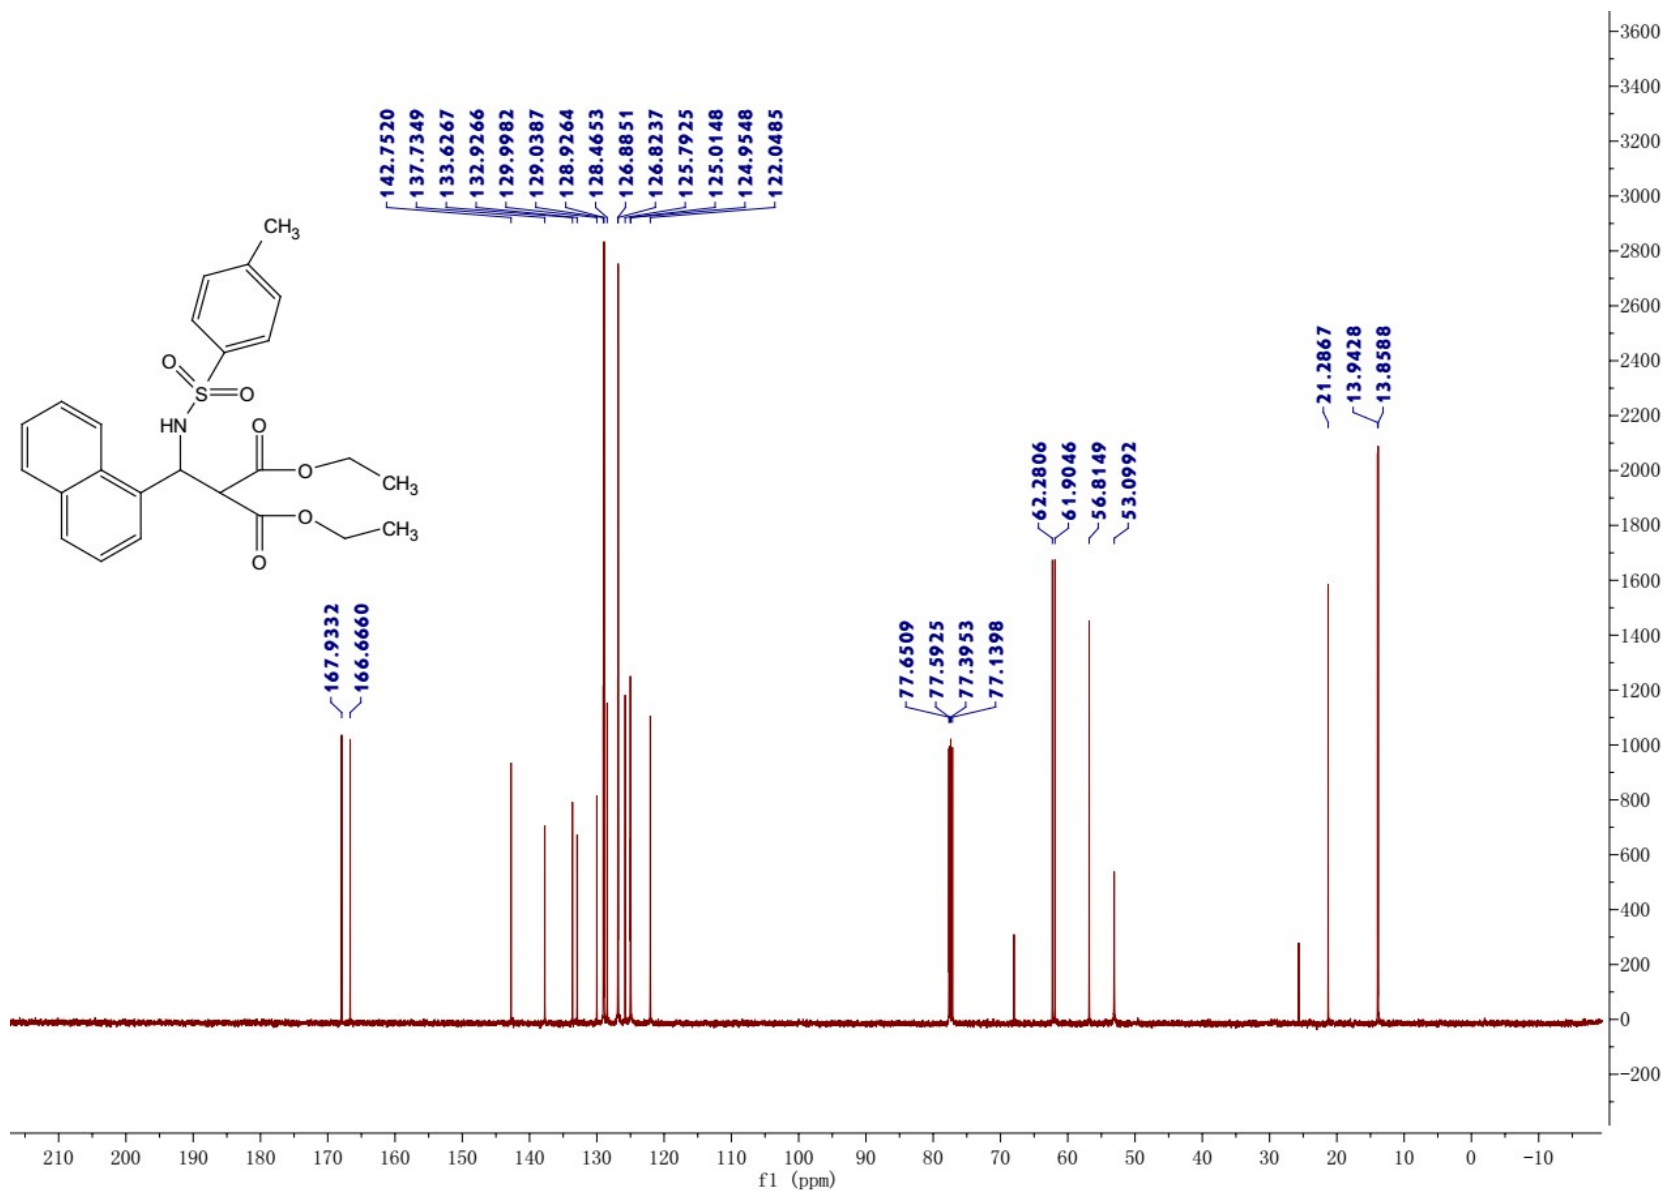

S60

2f

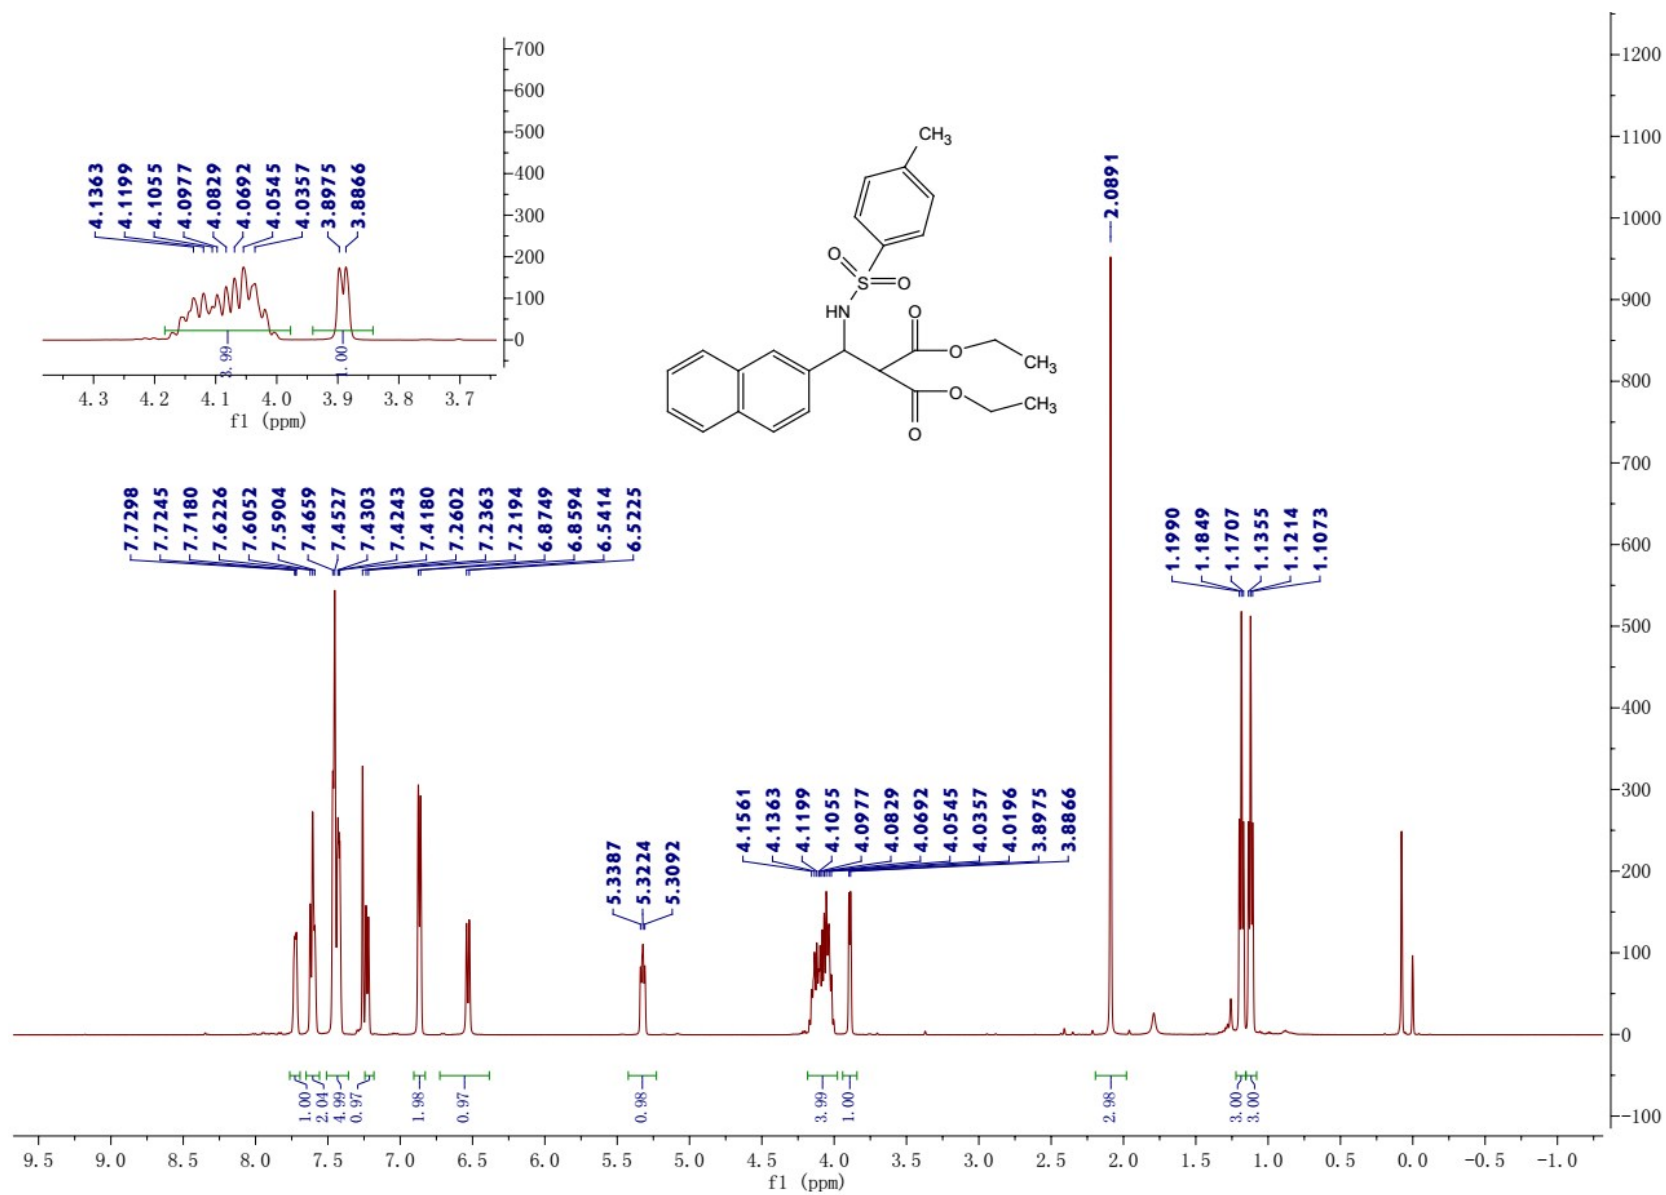

S61

2f

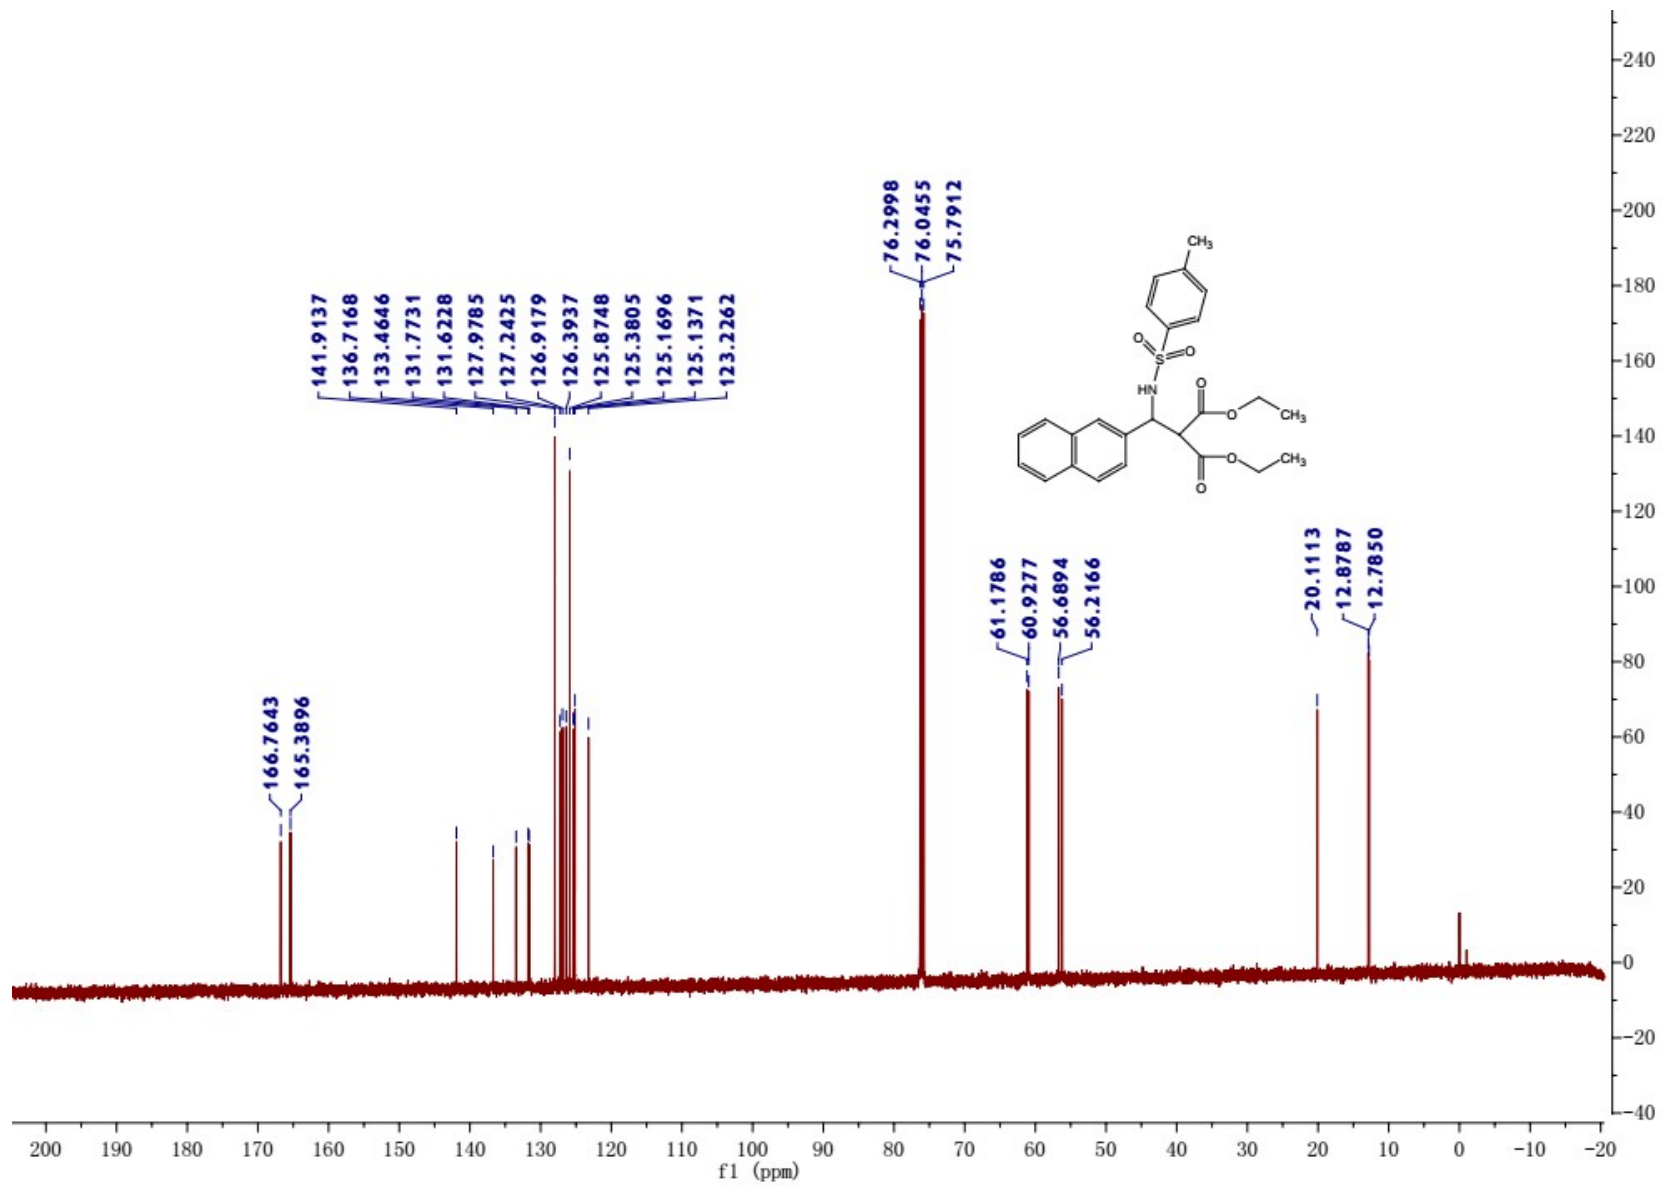

S62

2g

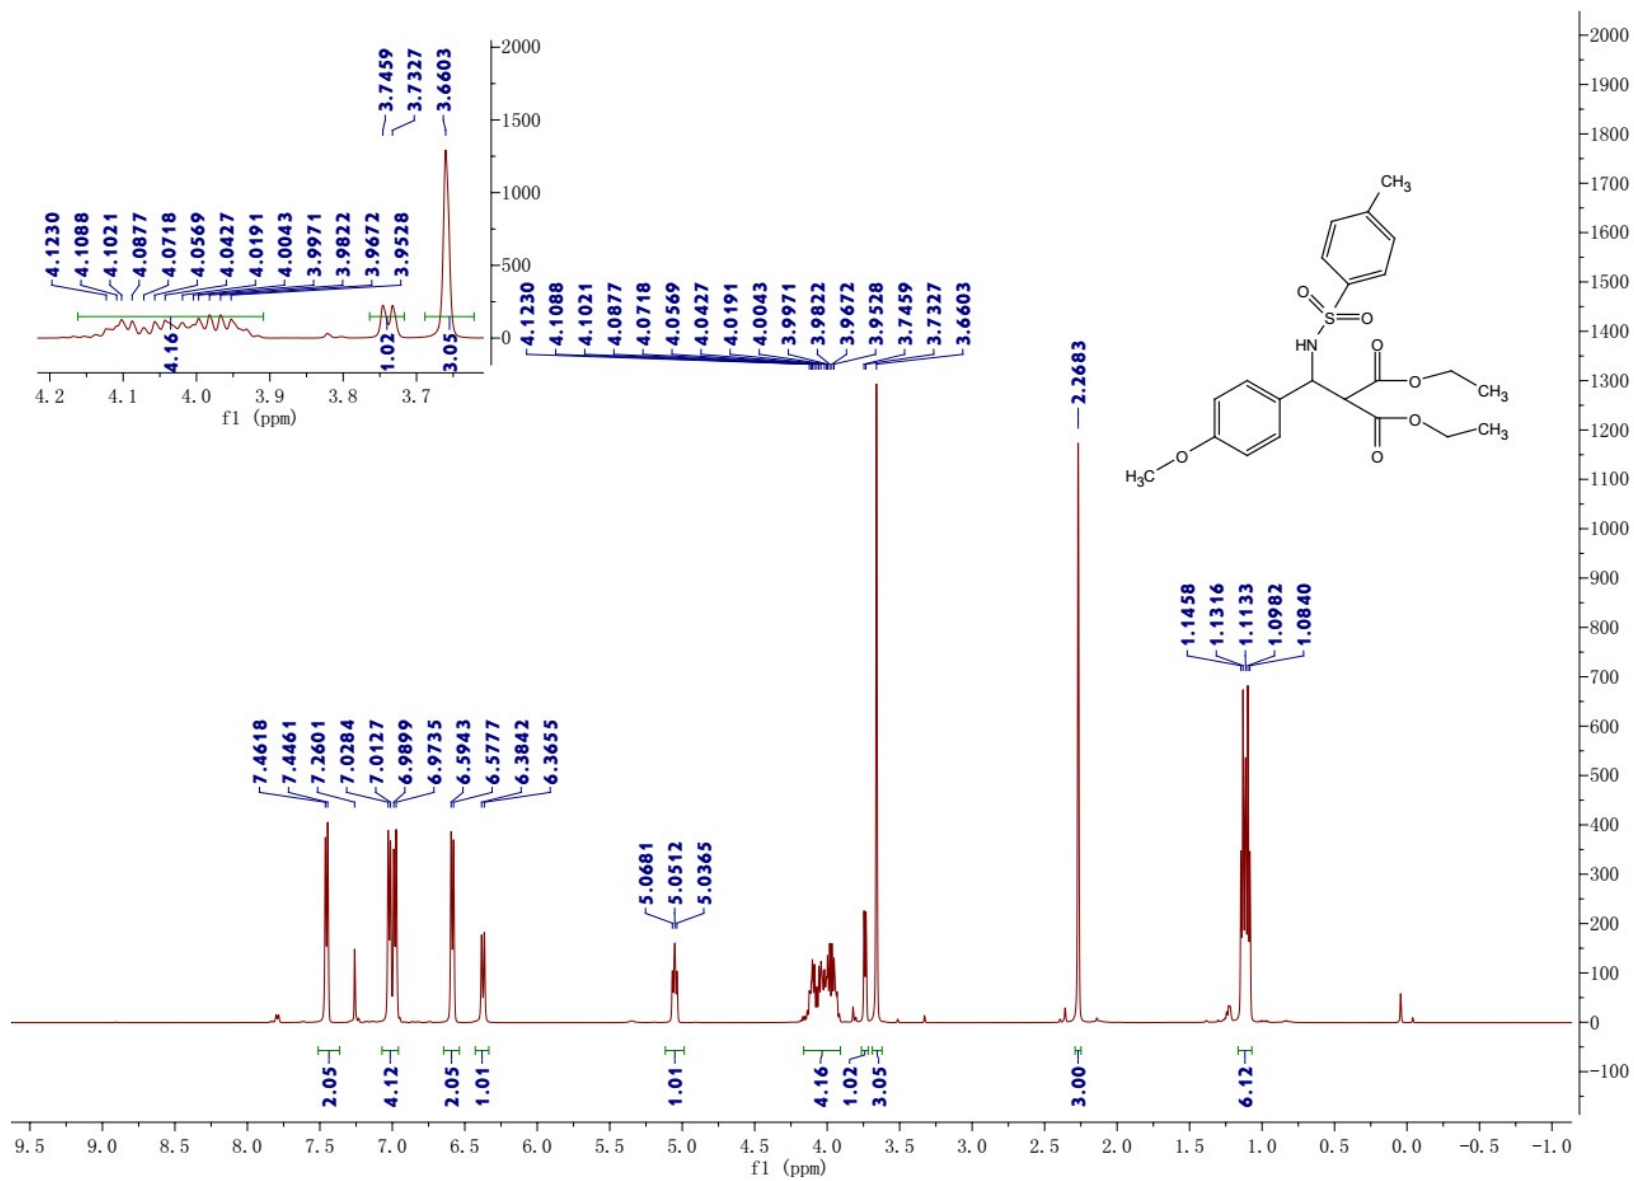

2g

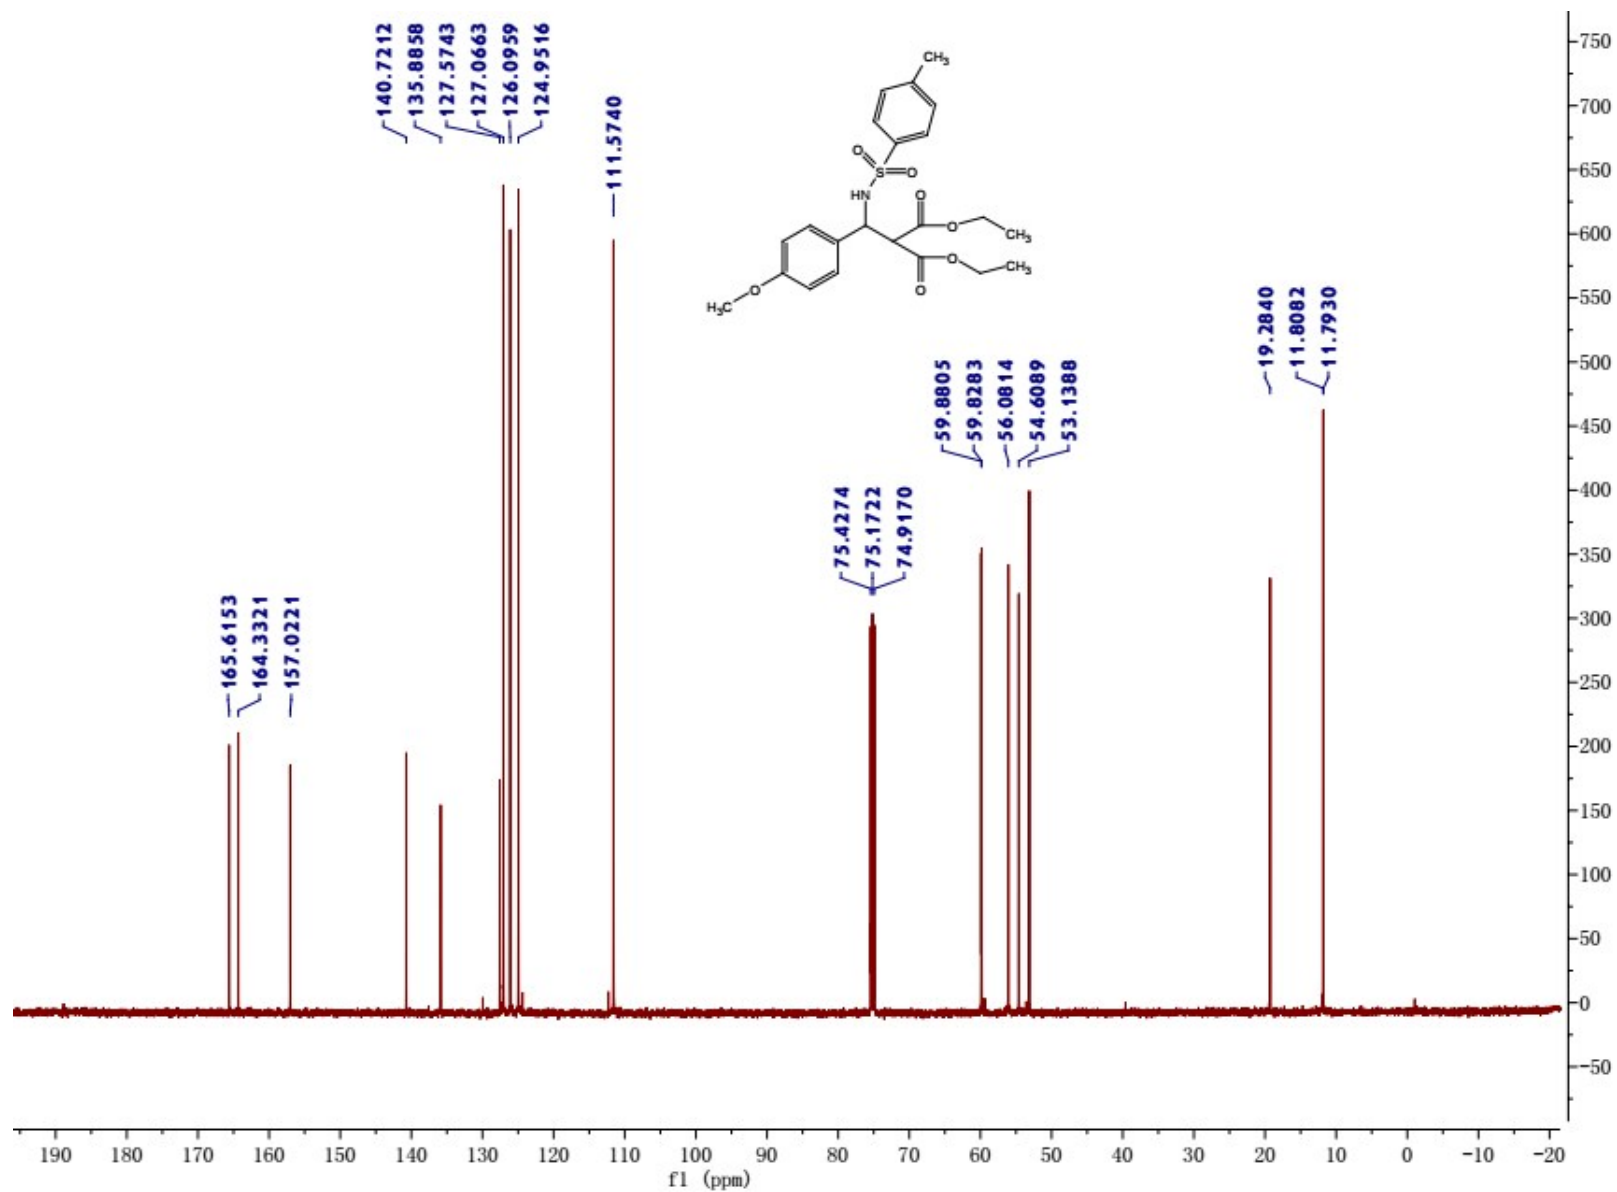

S64



2h

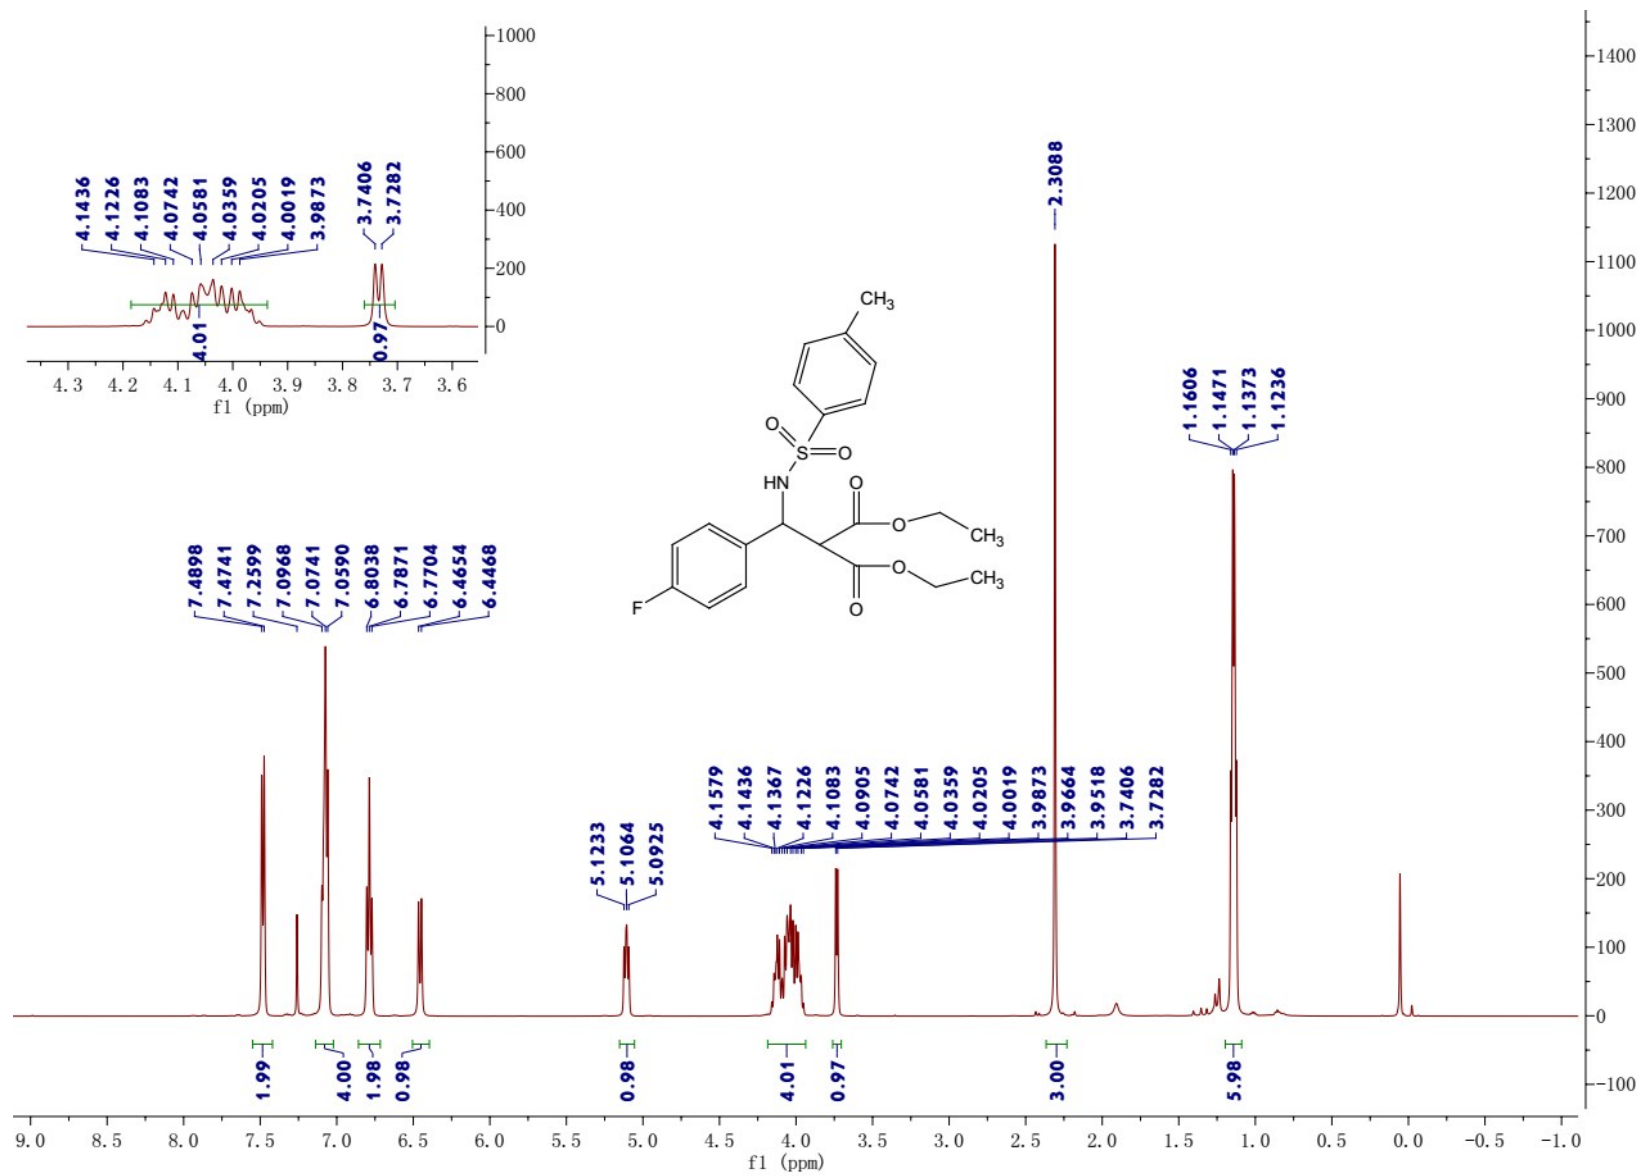

S65

2h

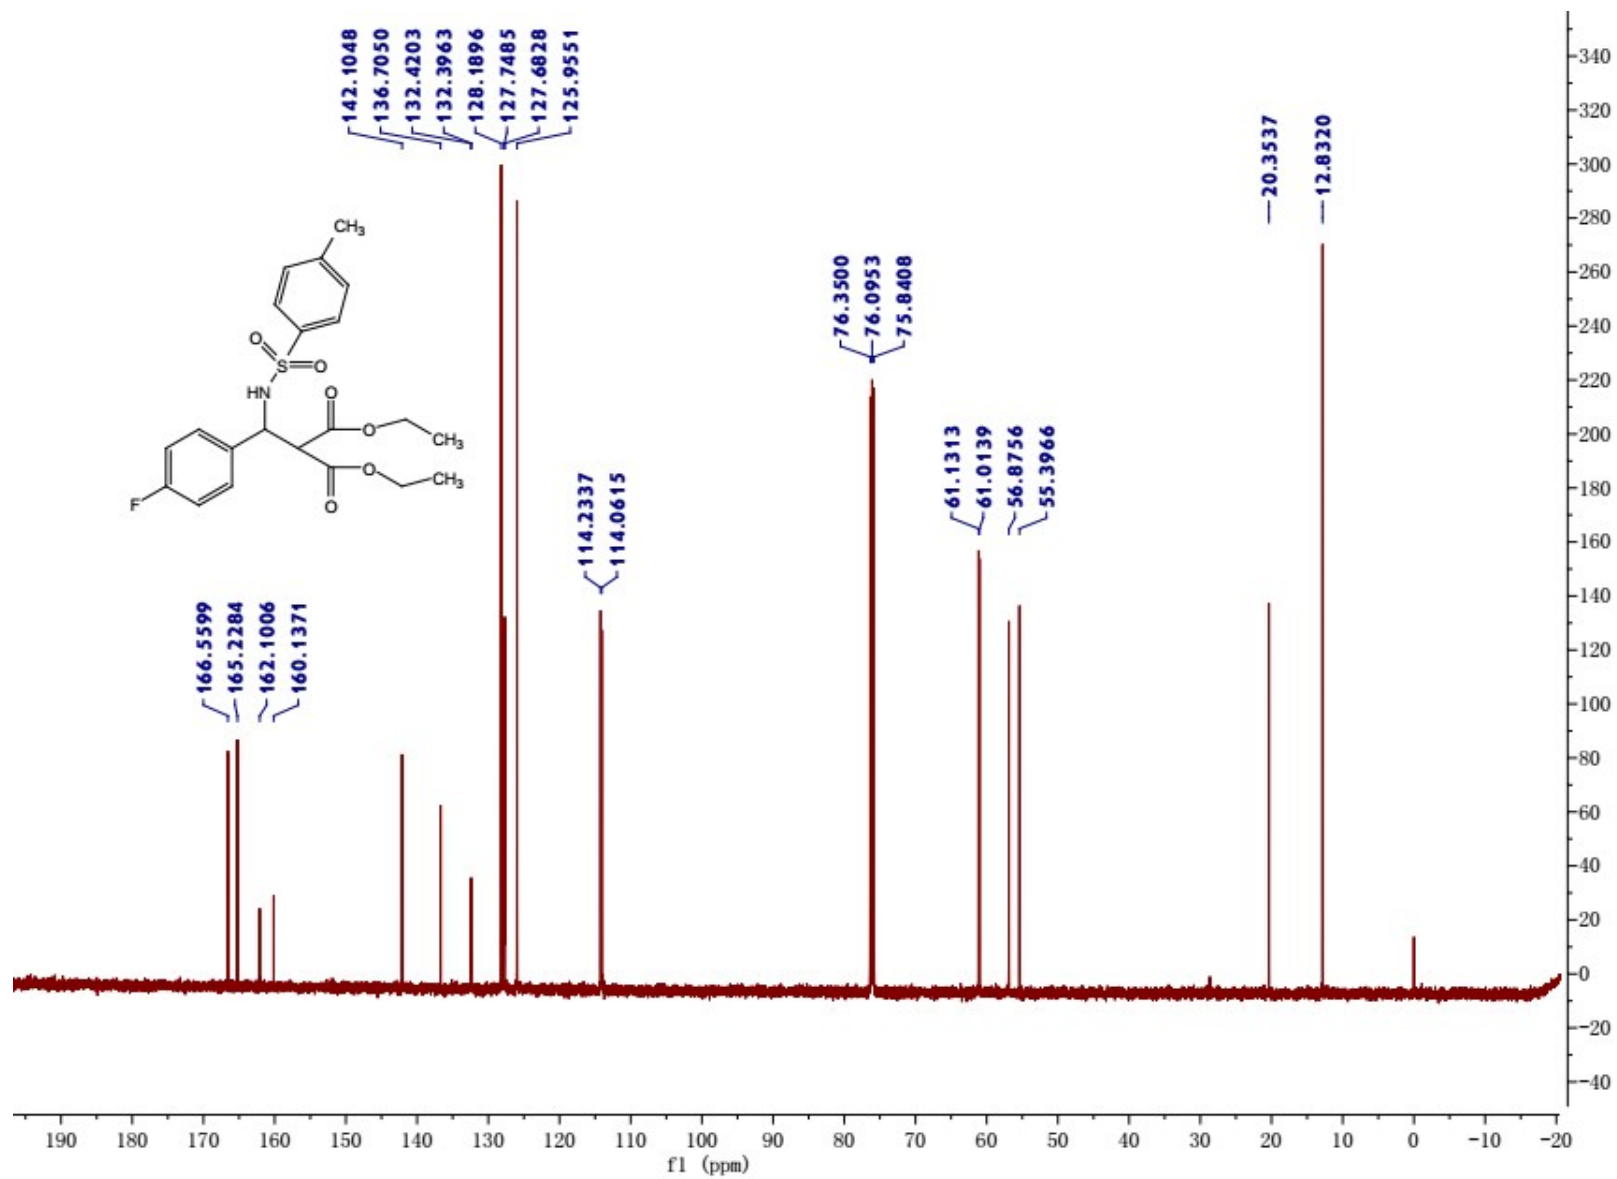

S66

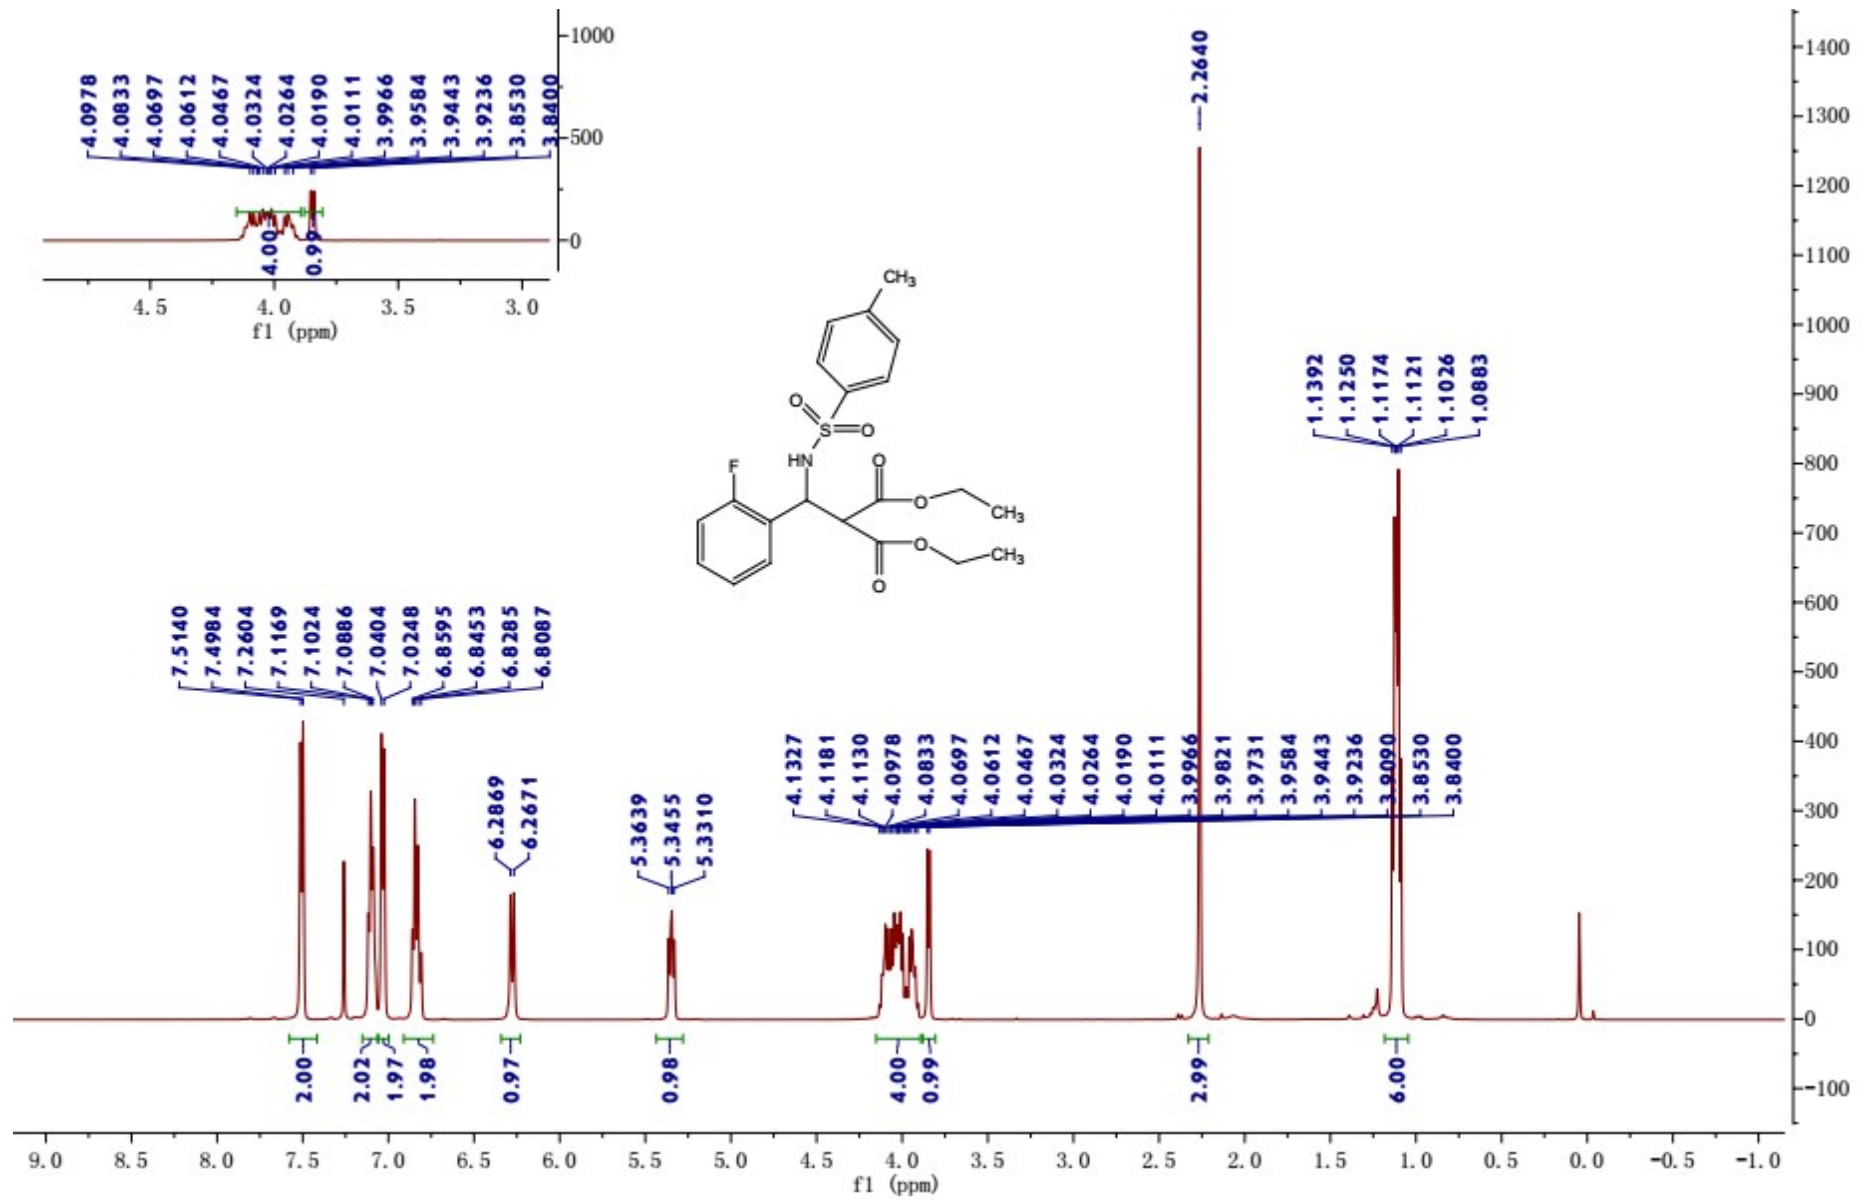

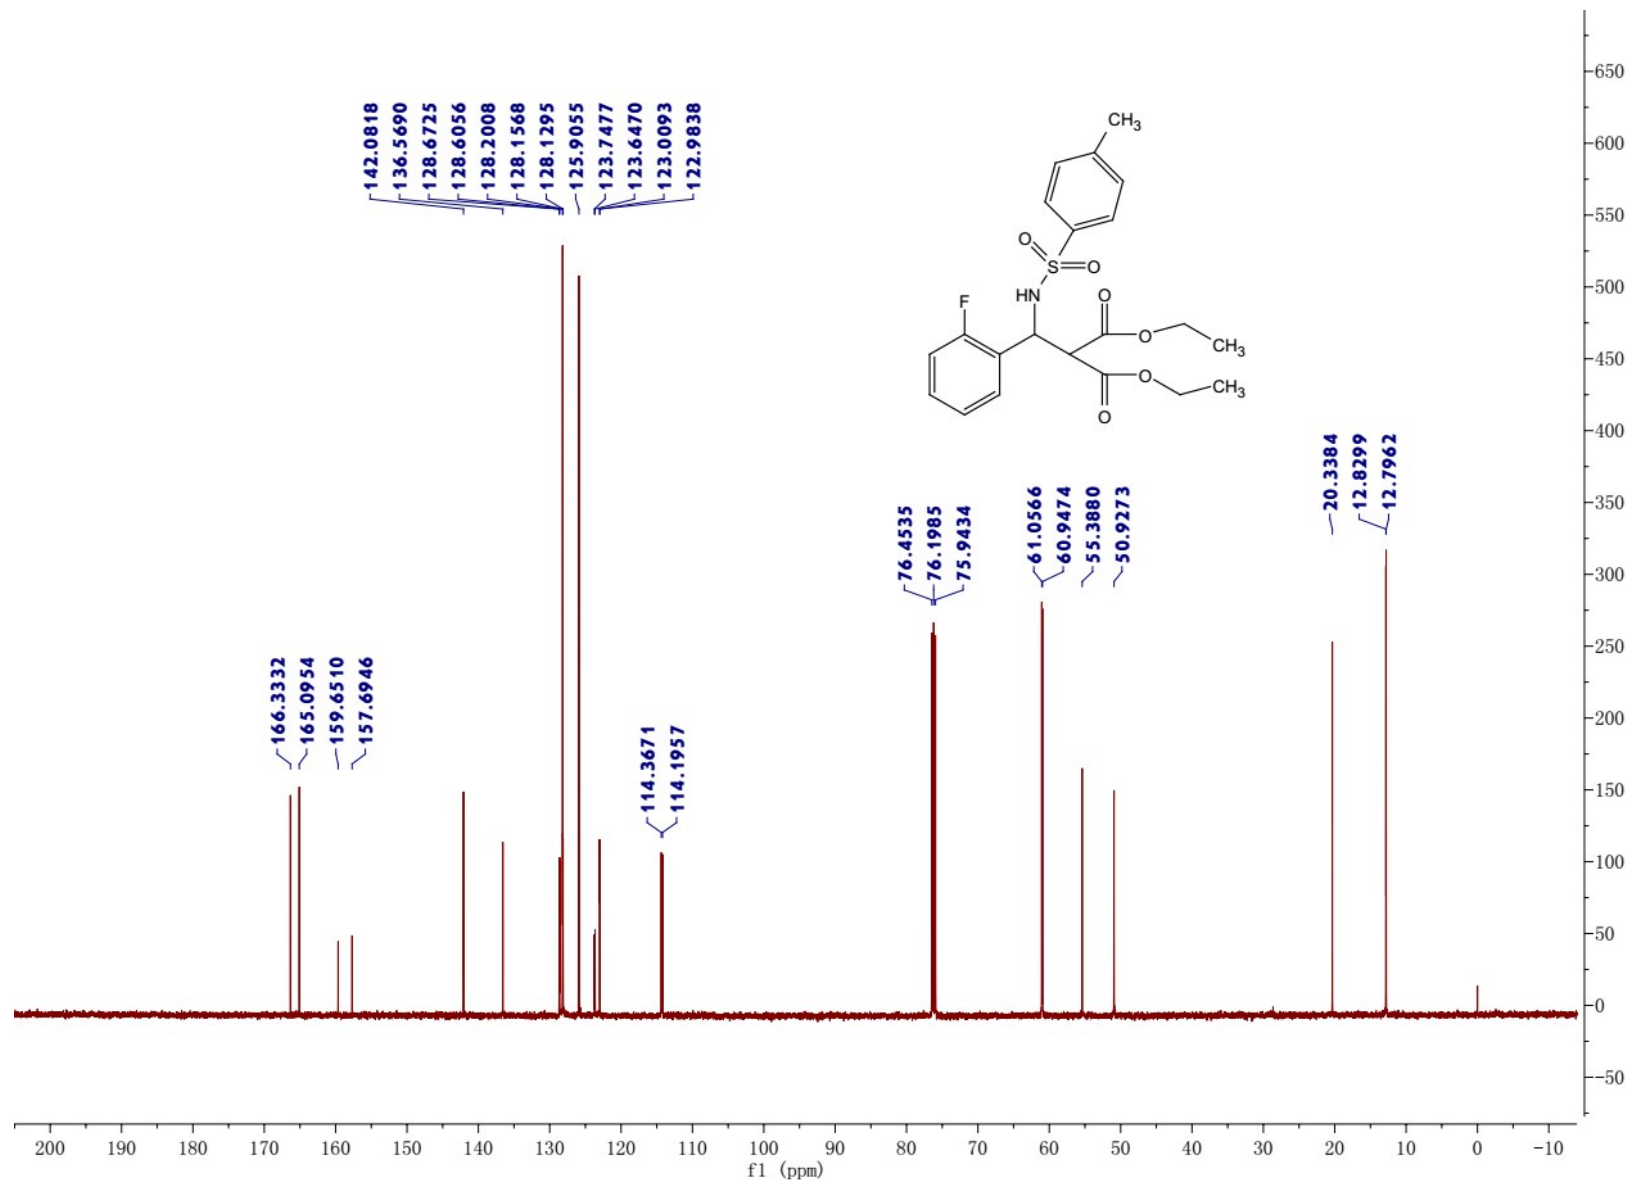

2j

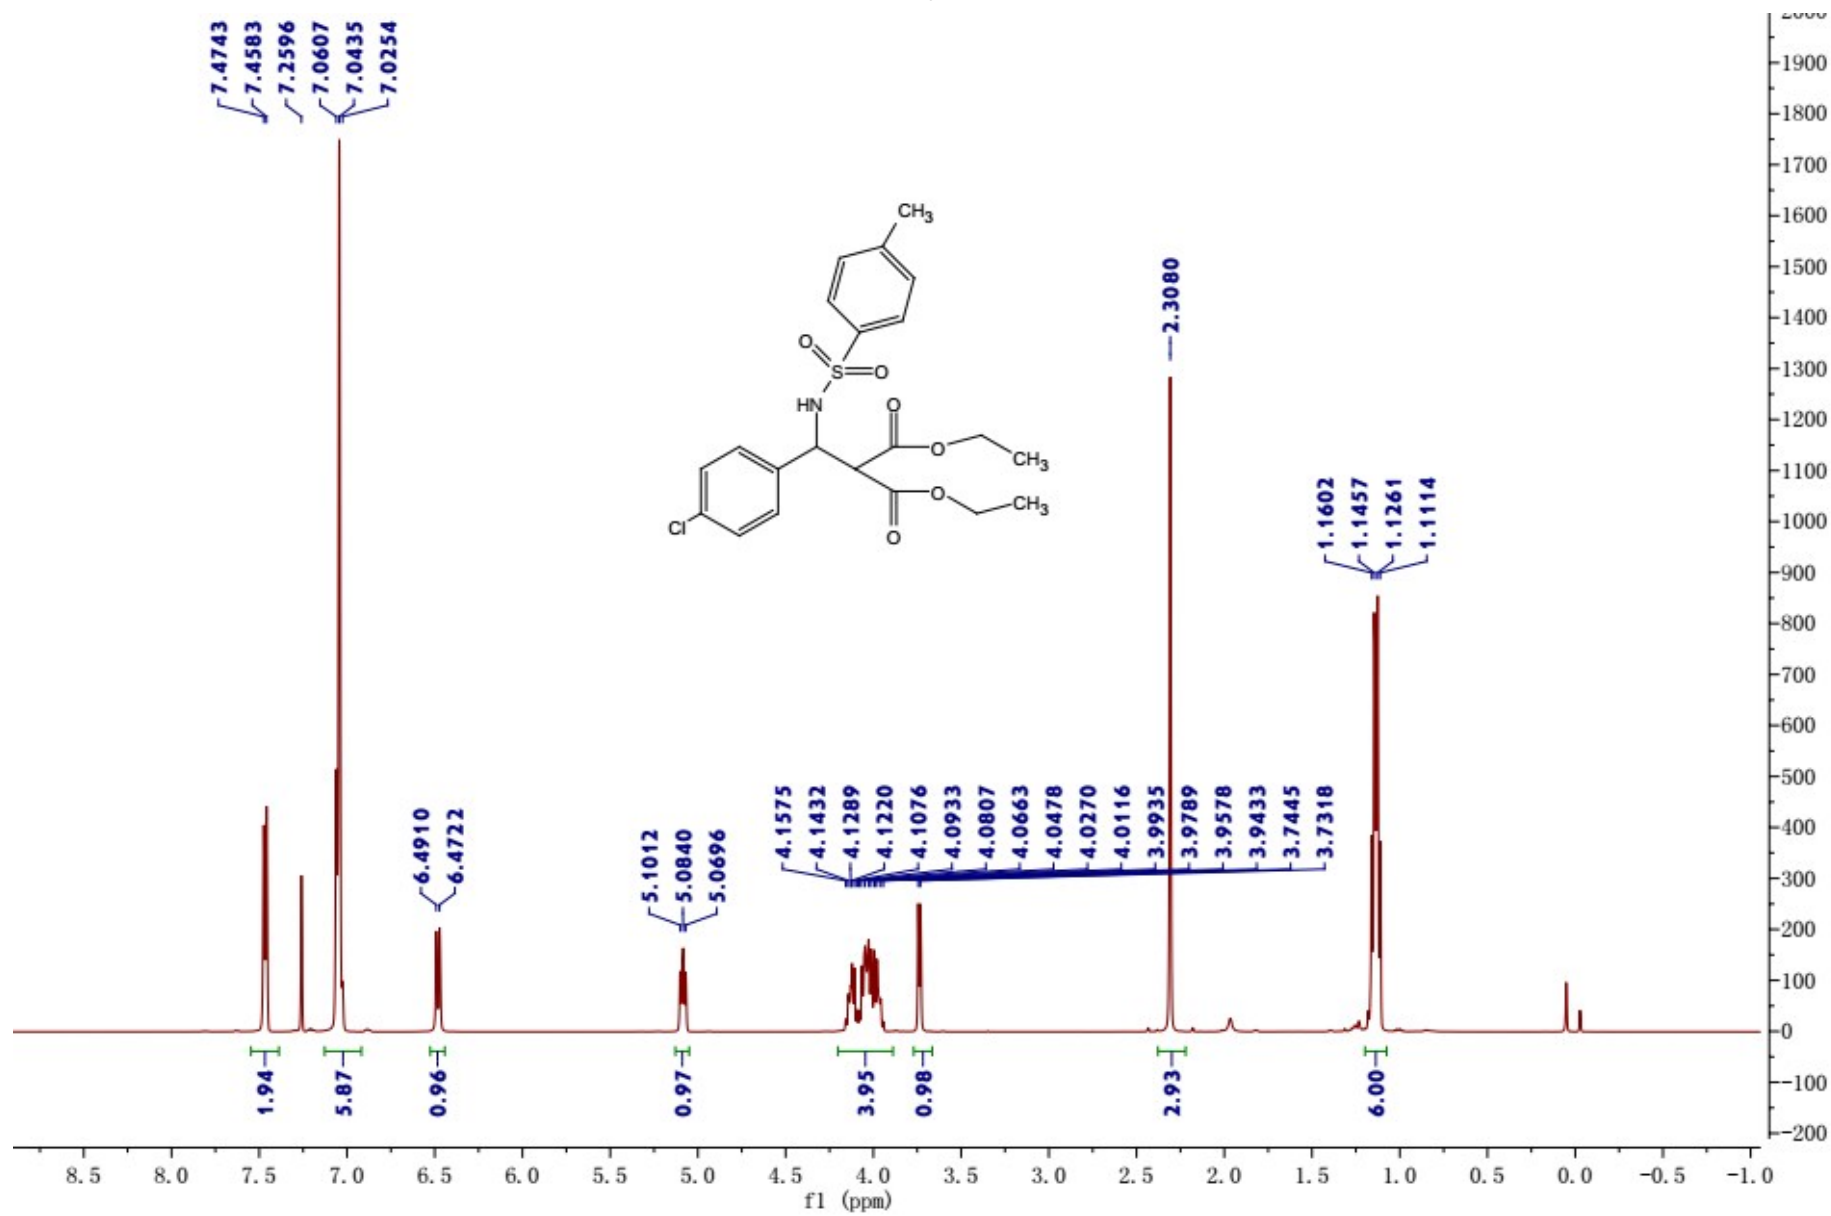

2j

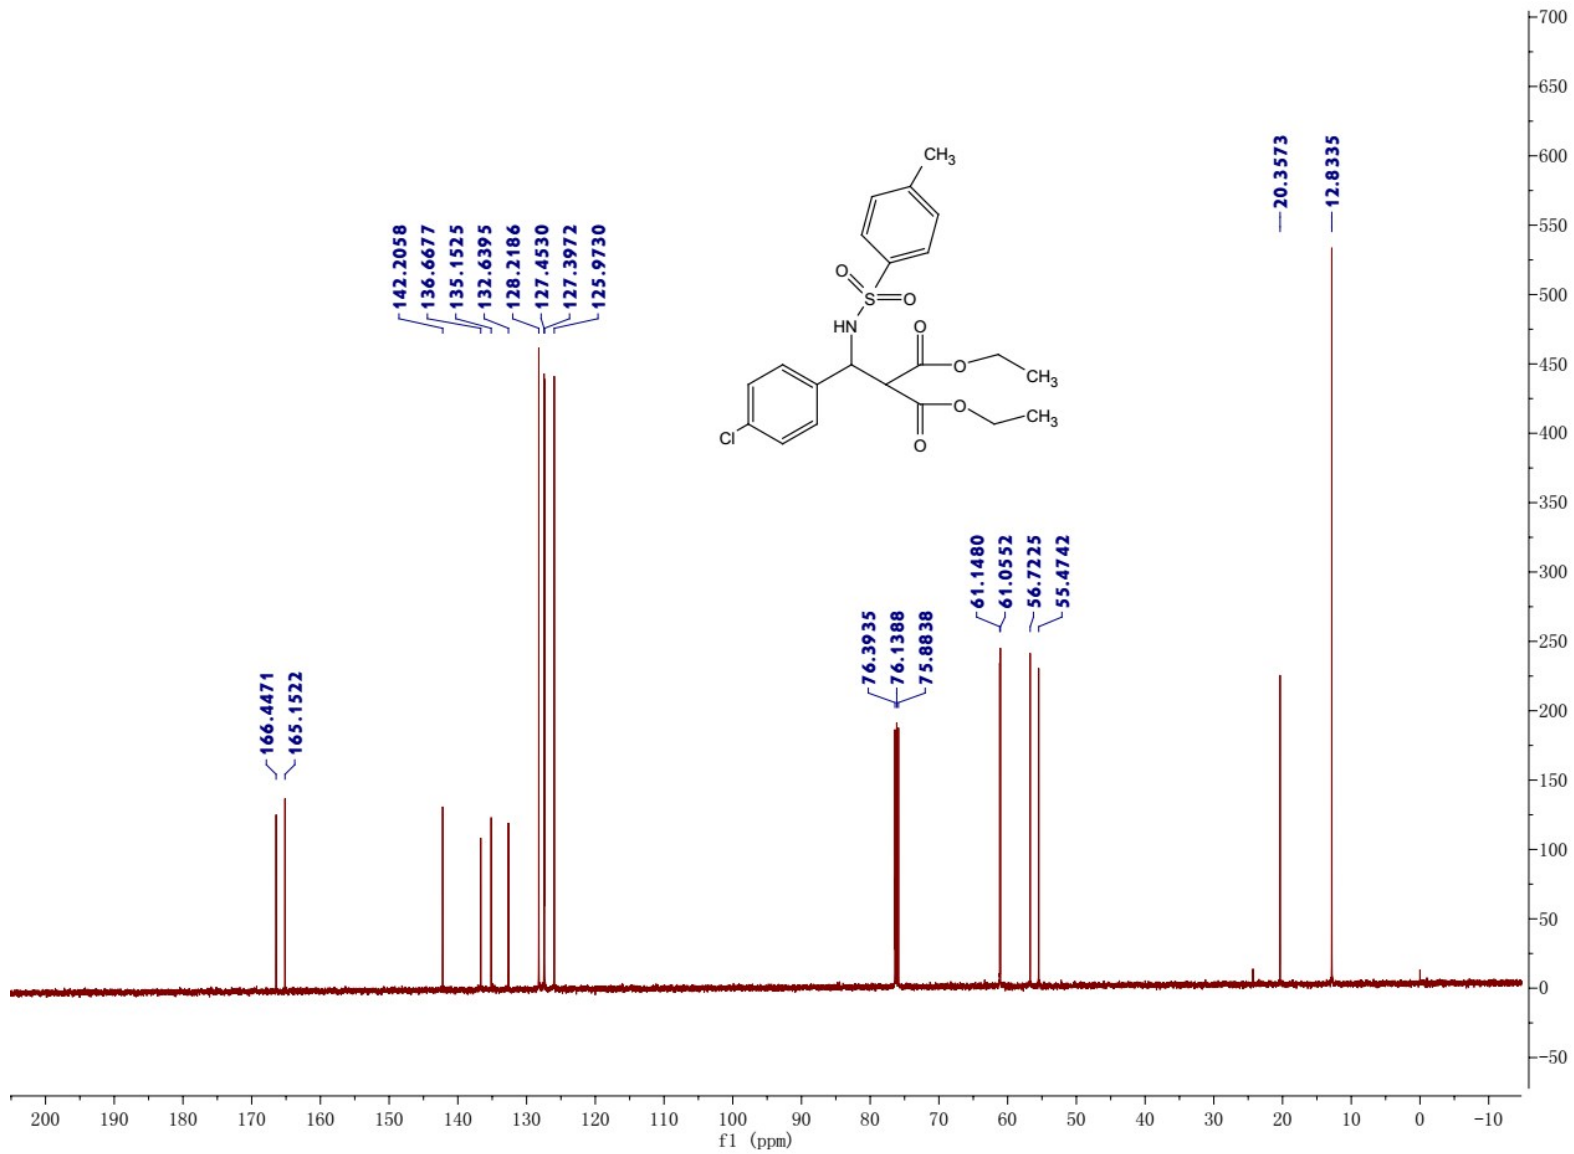

2k

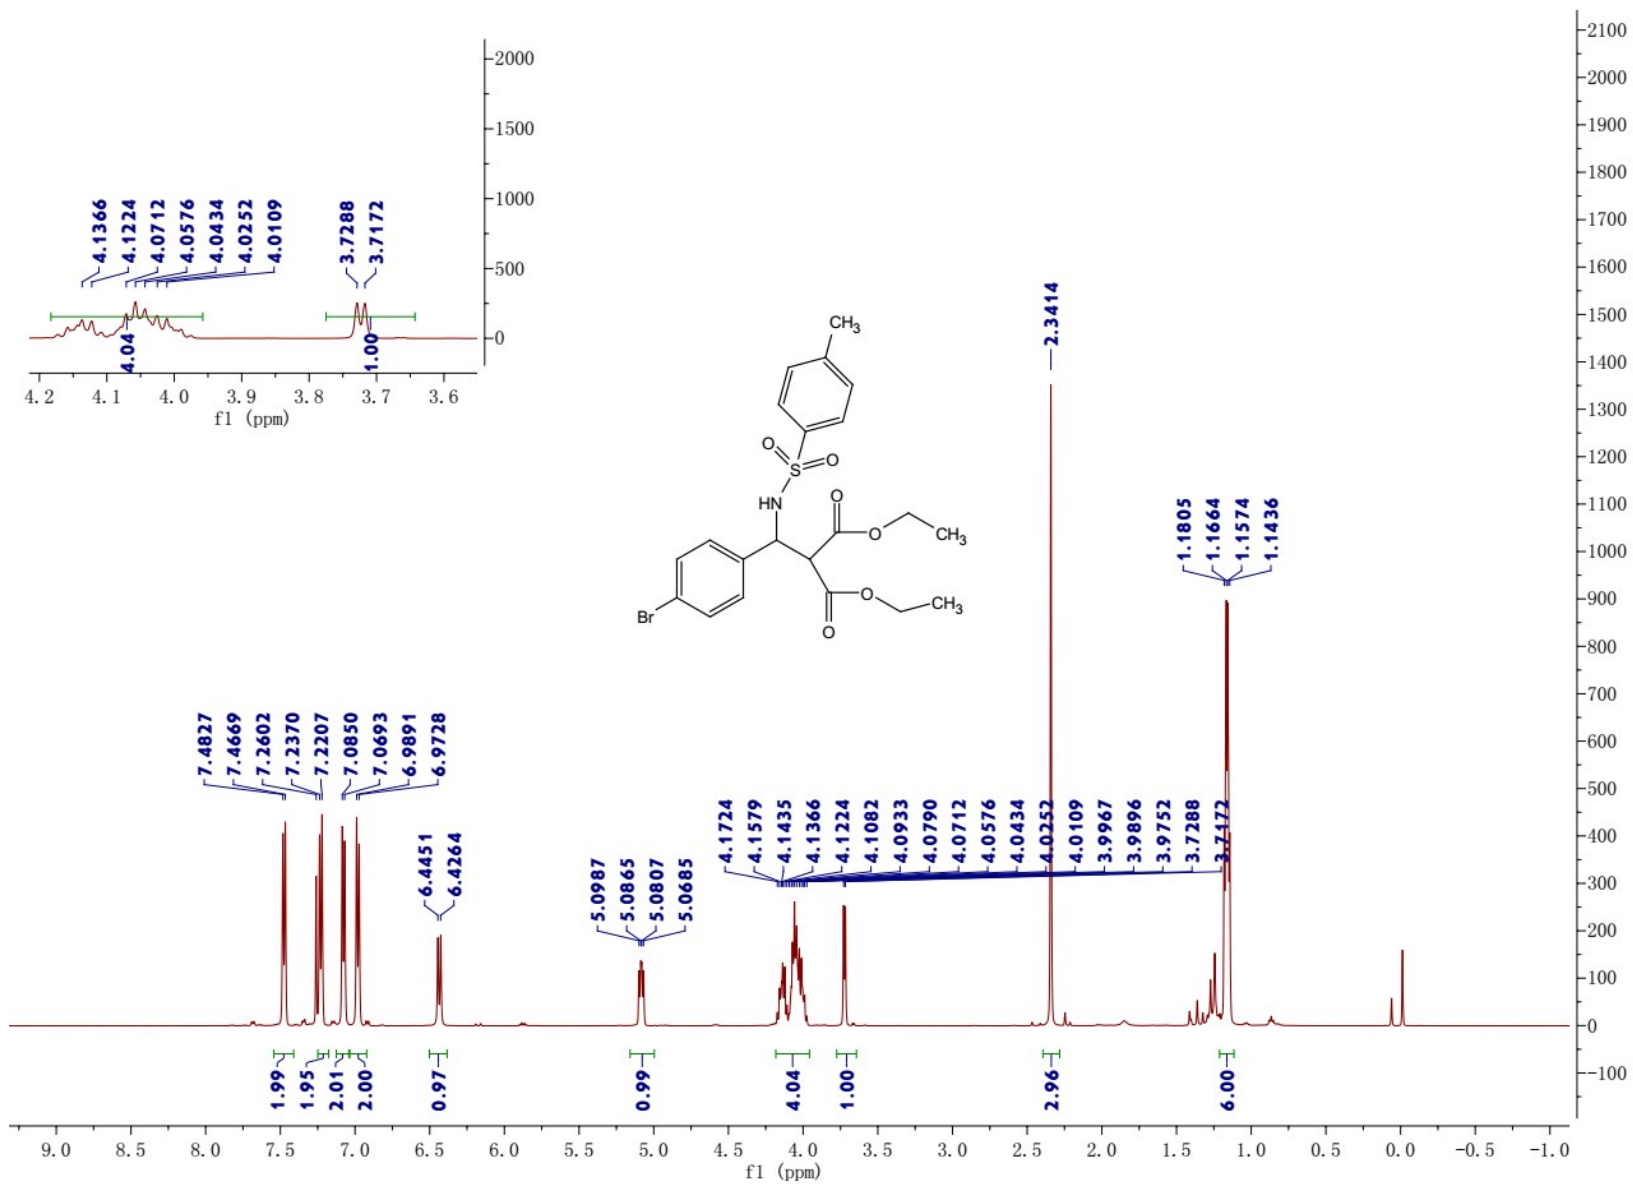

S71

2k

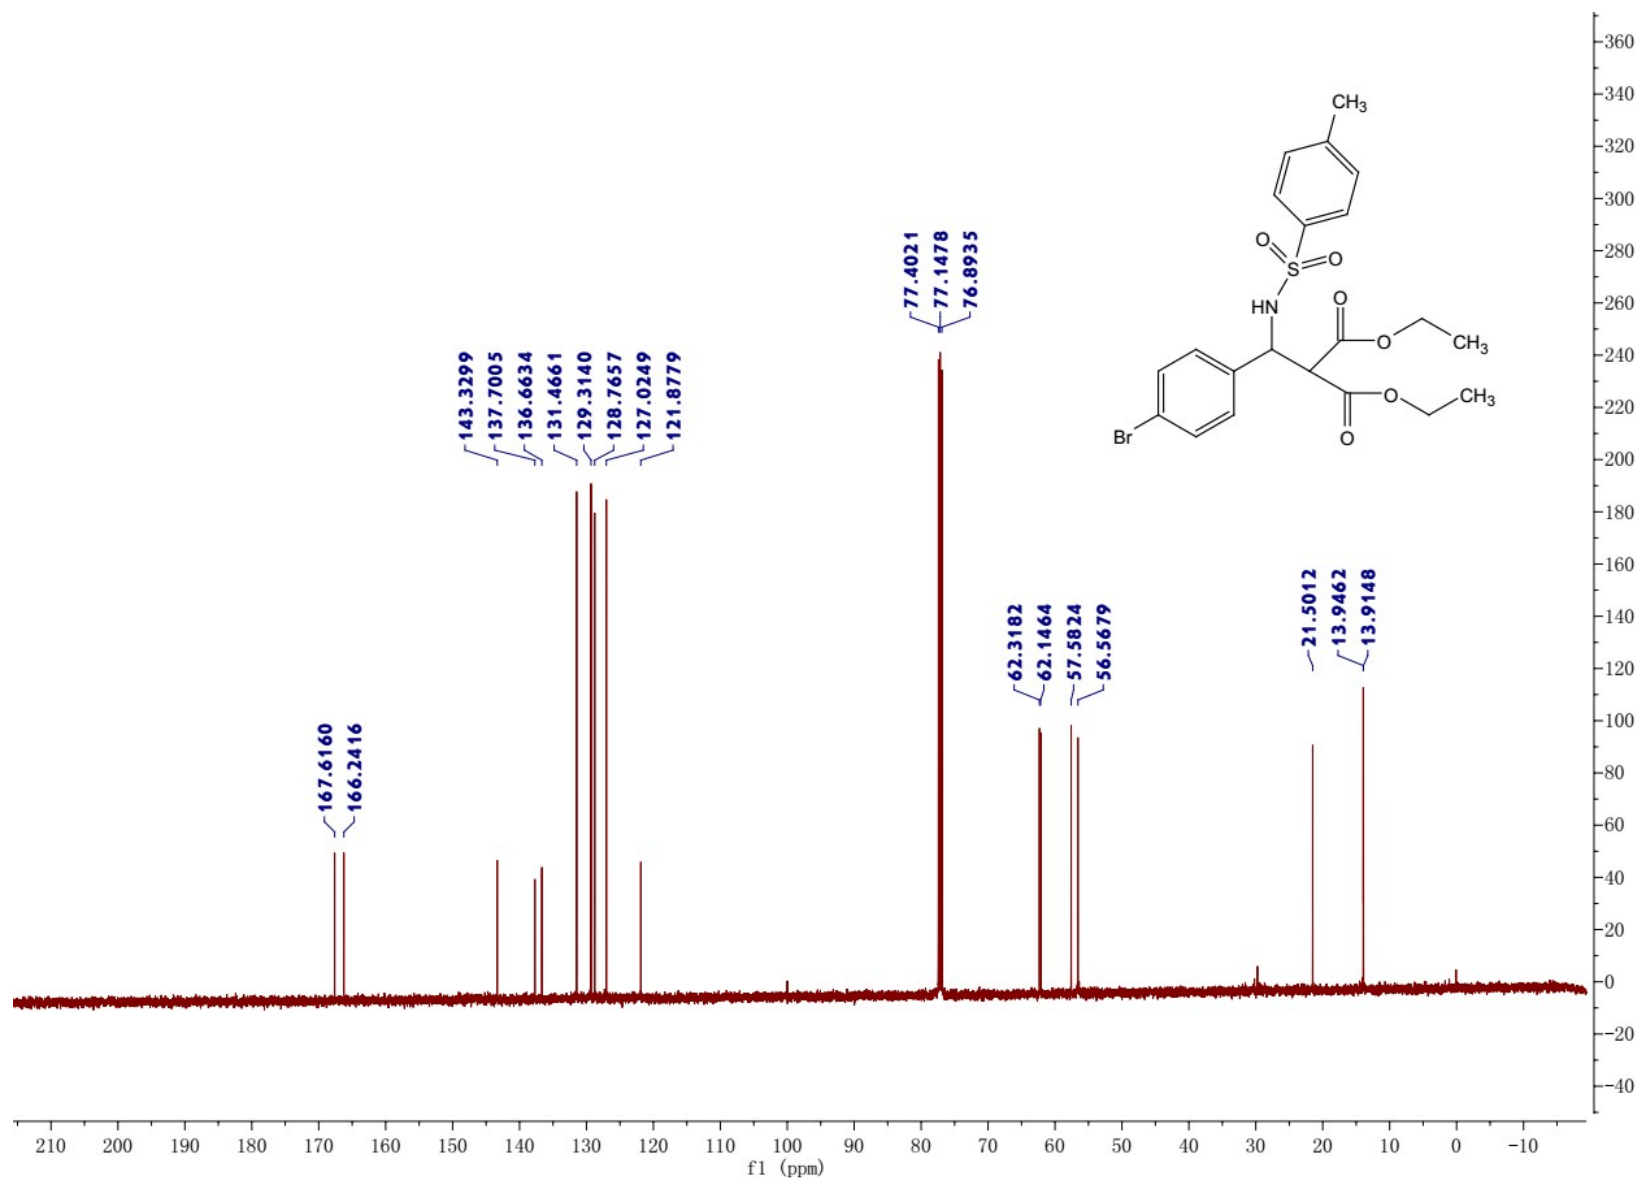

S72



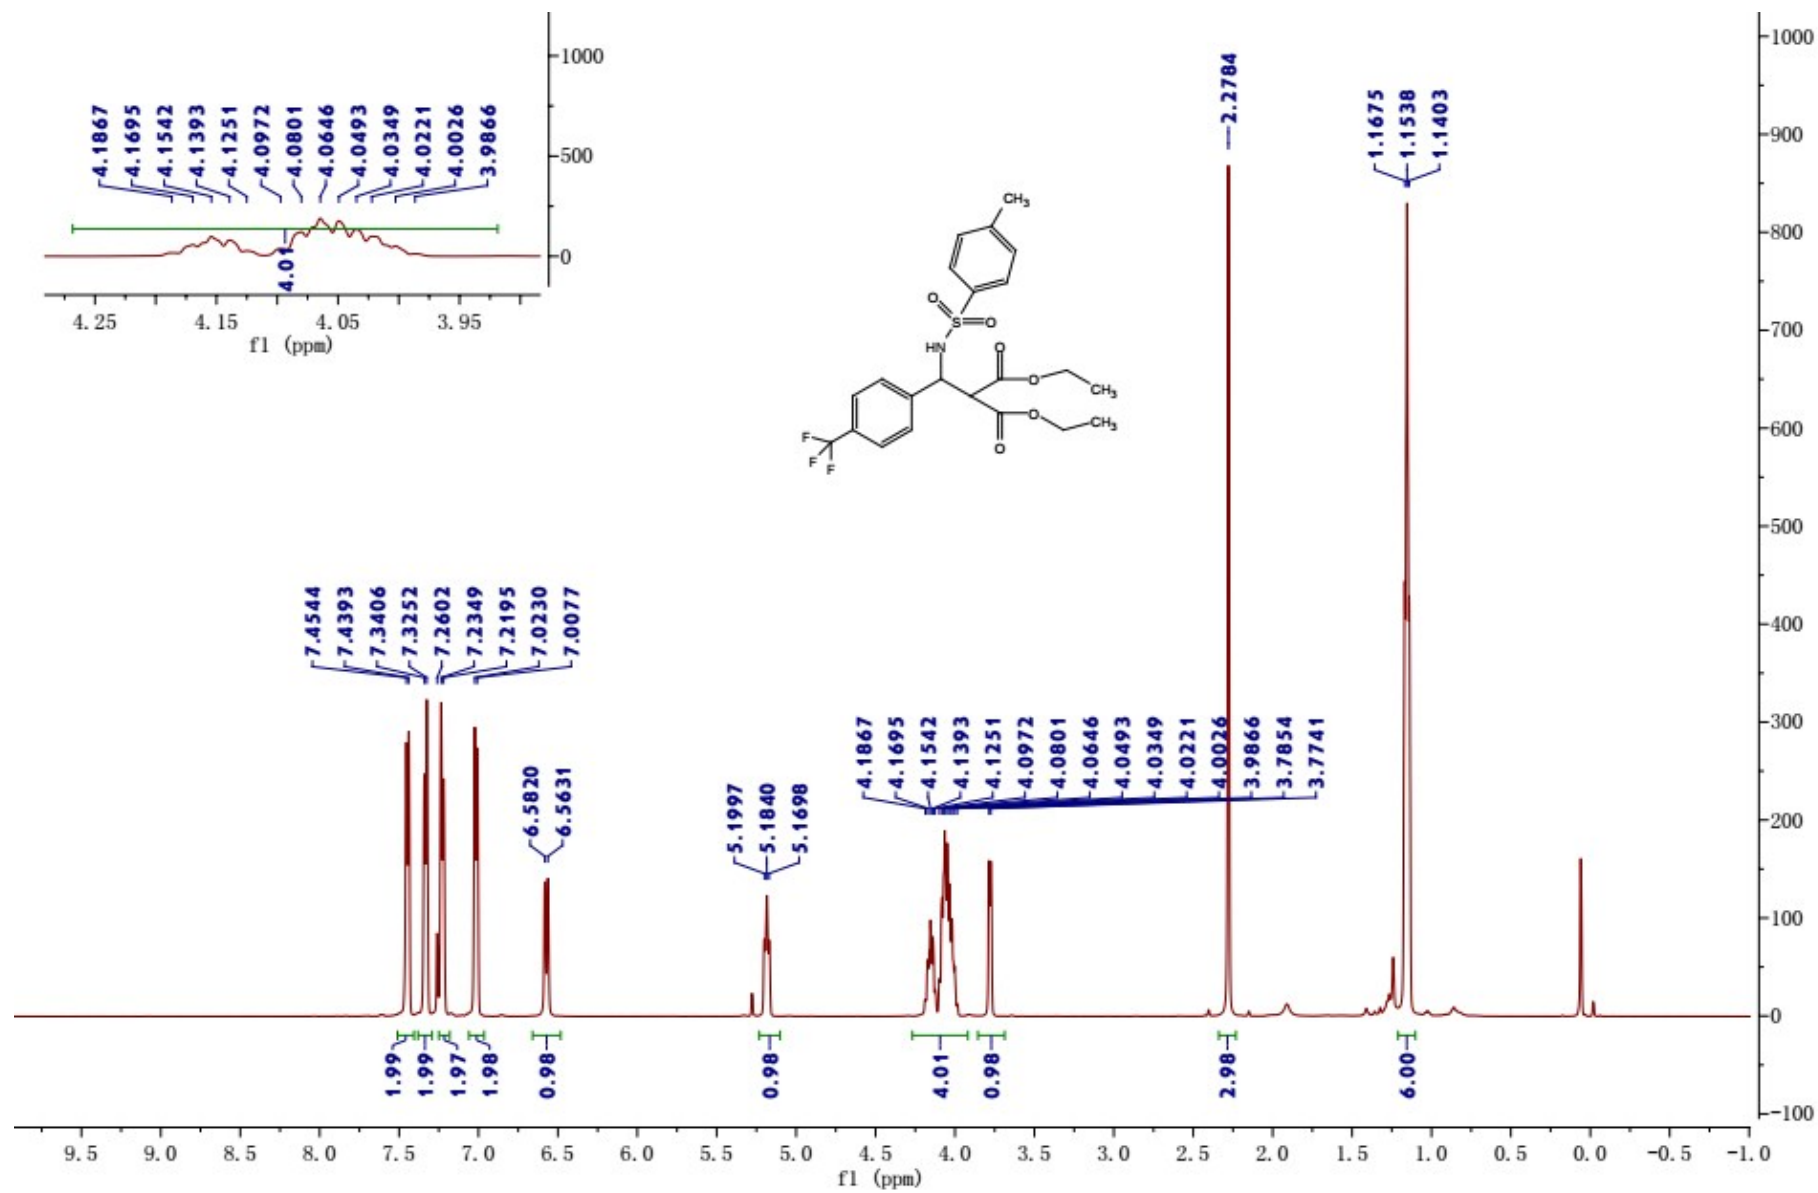

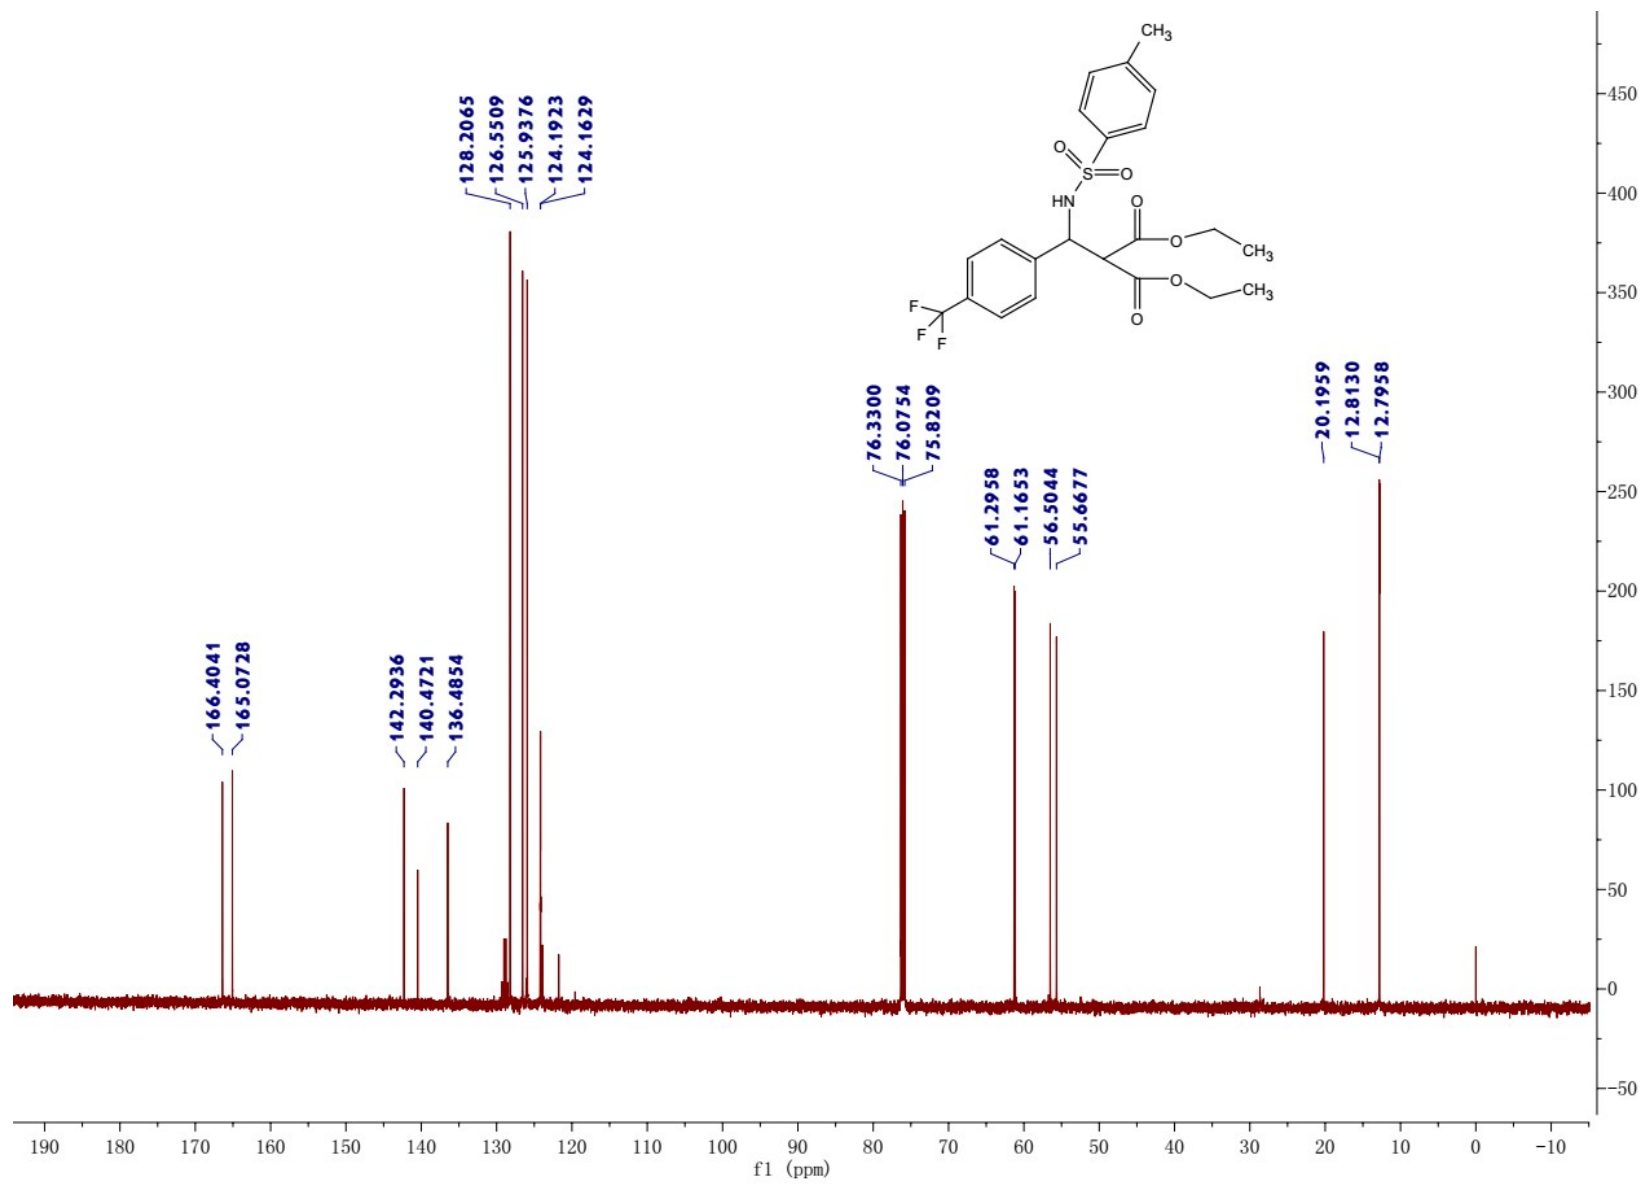

2m

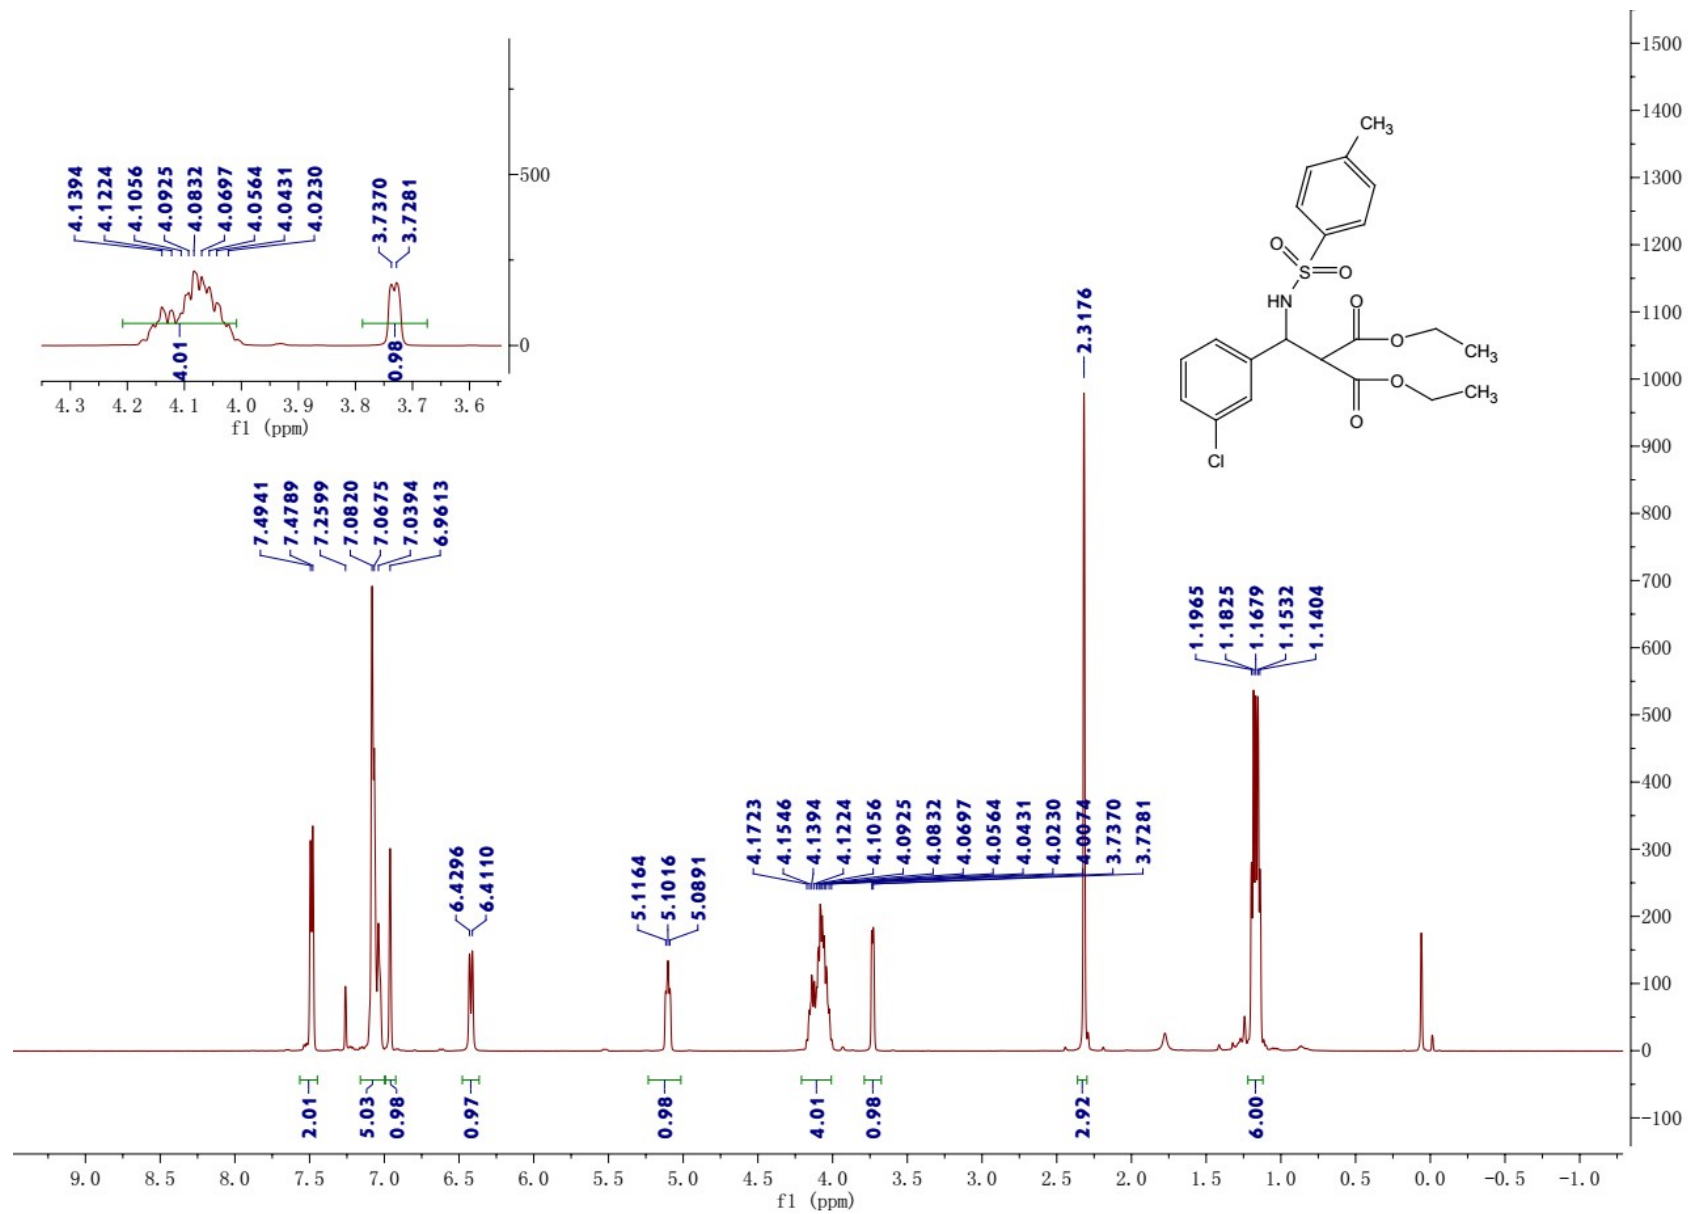

S75

2m

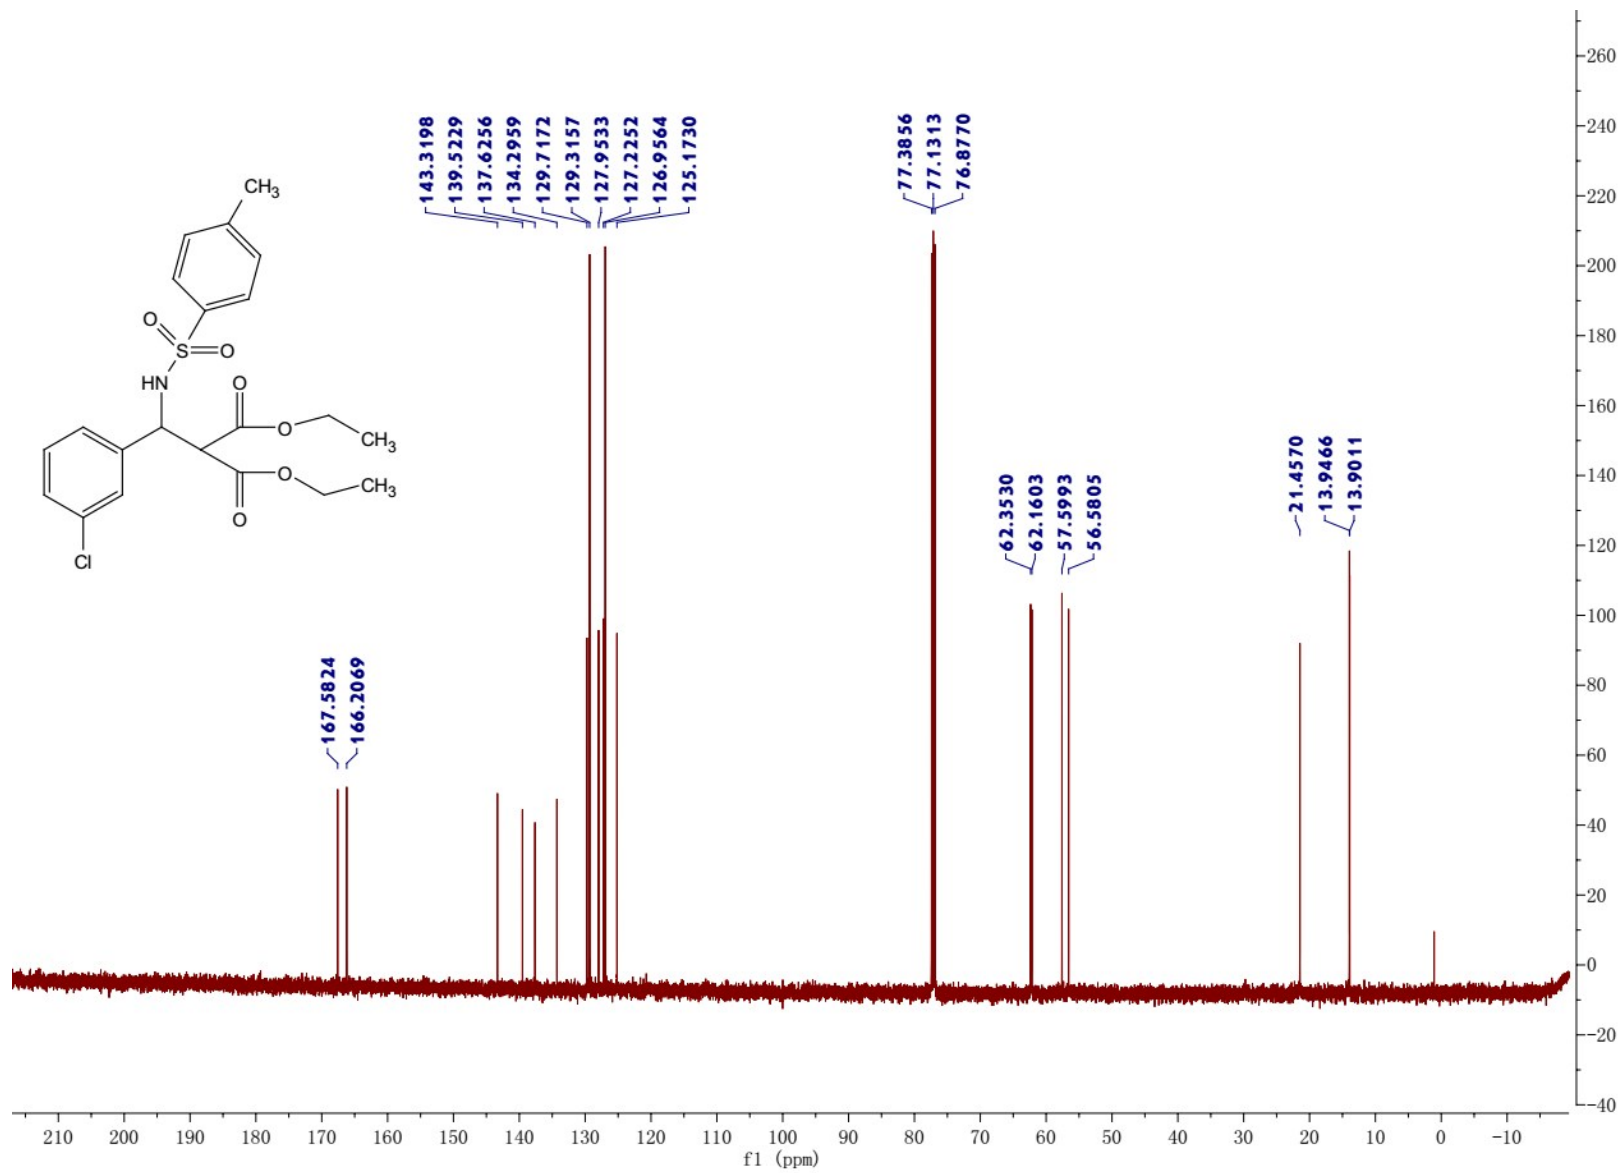

S76

2n

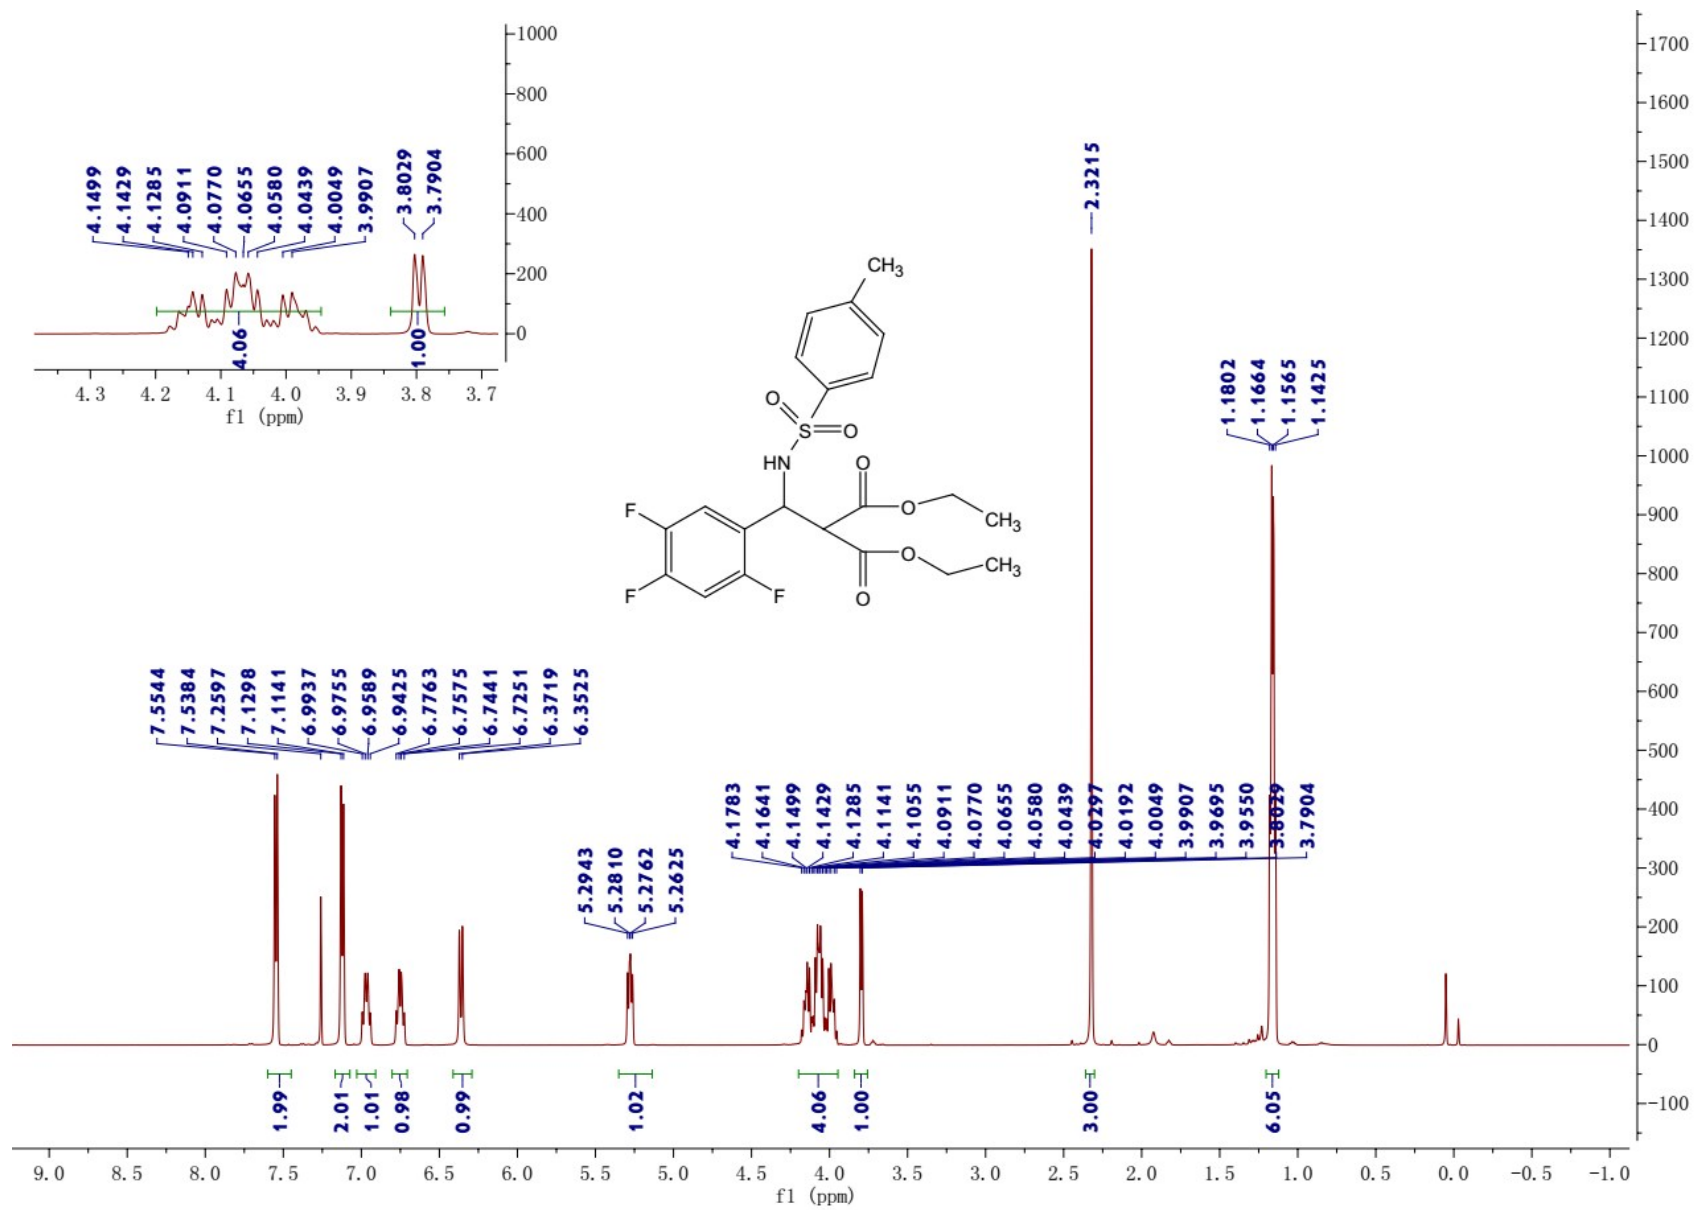

S77

2n

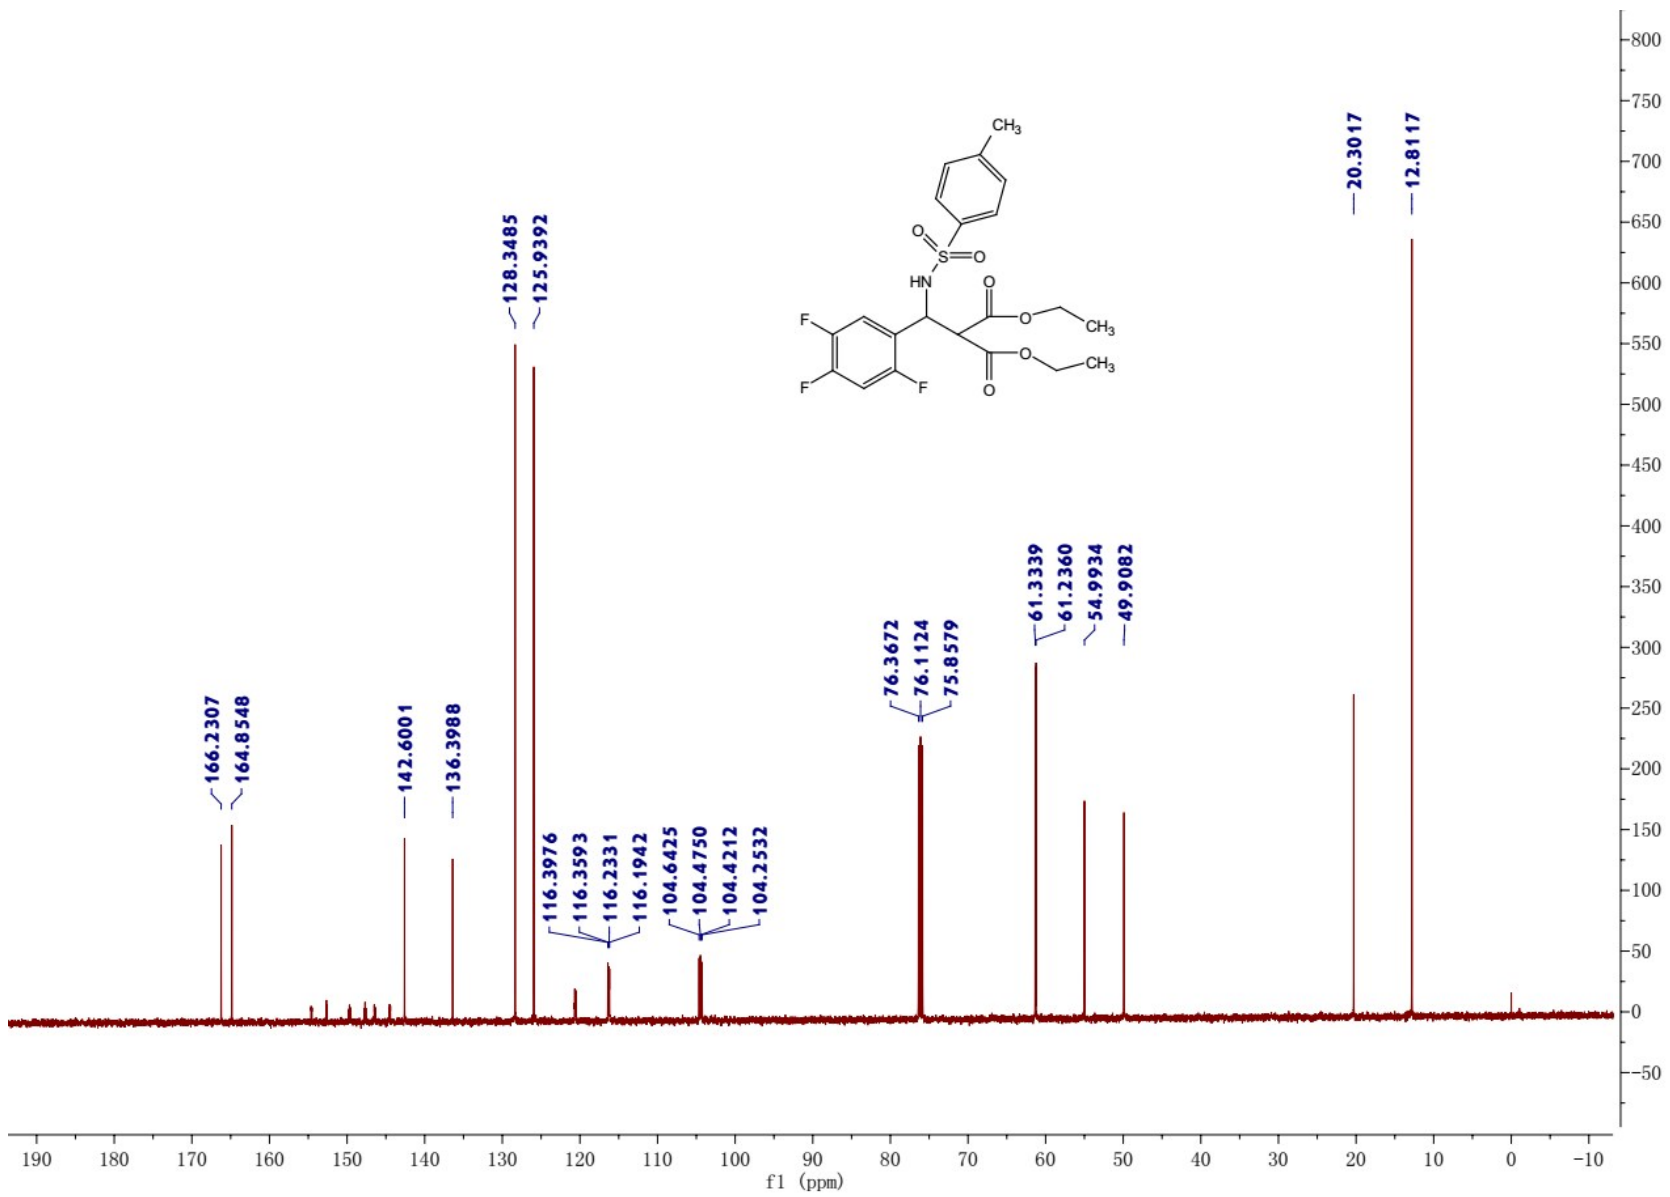

S78

2o

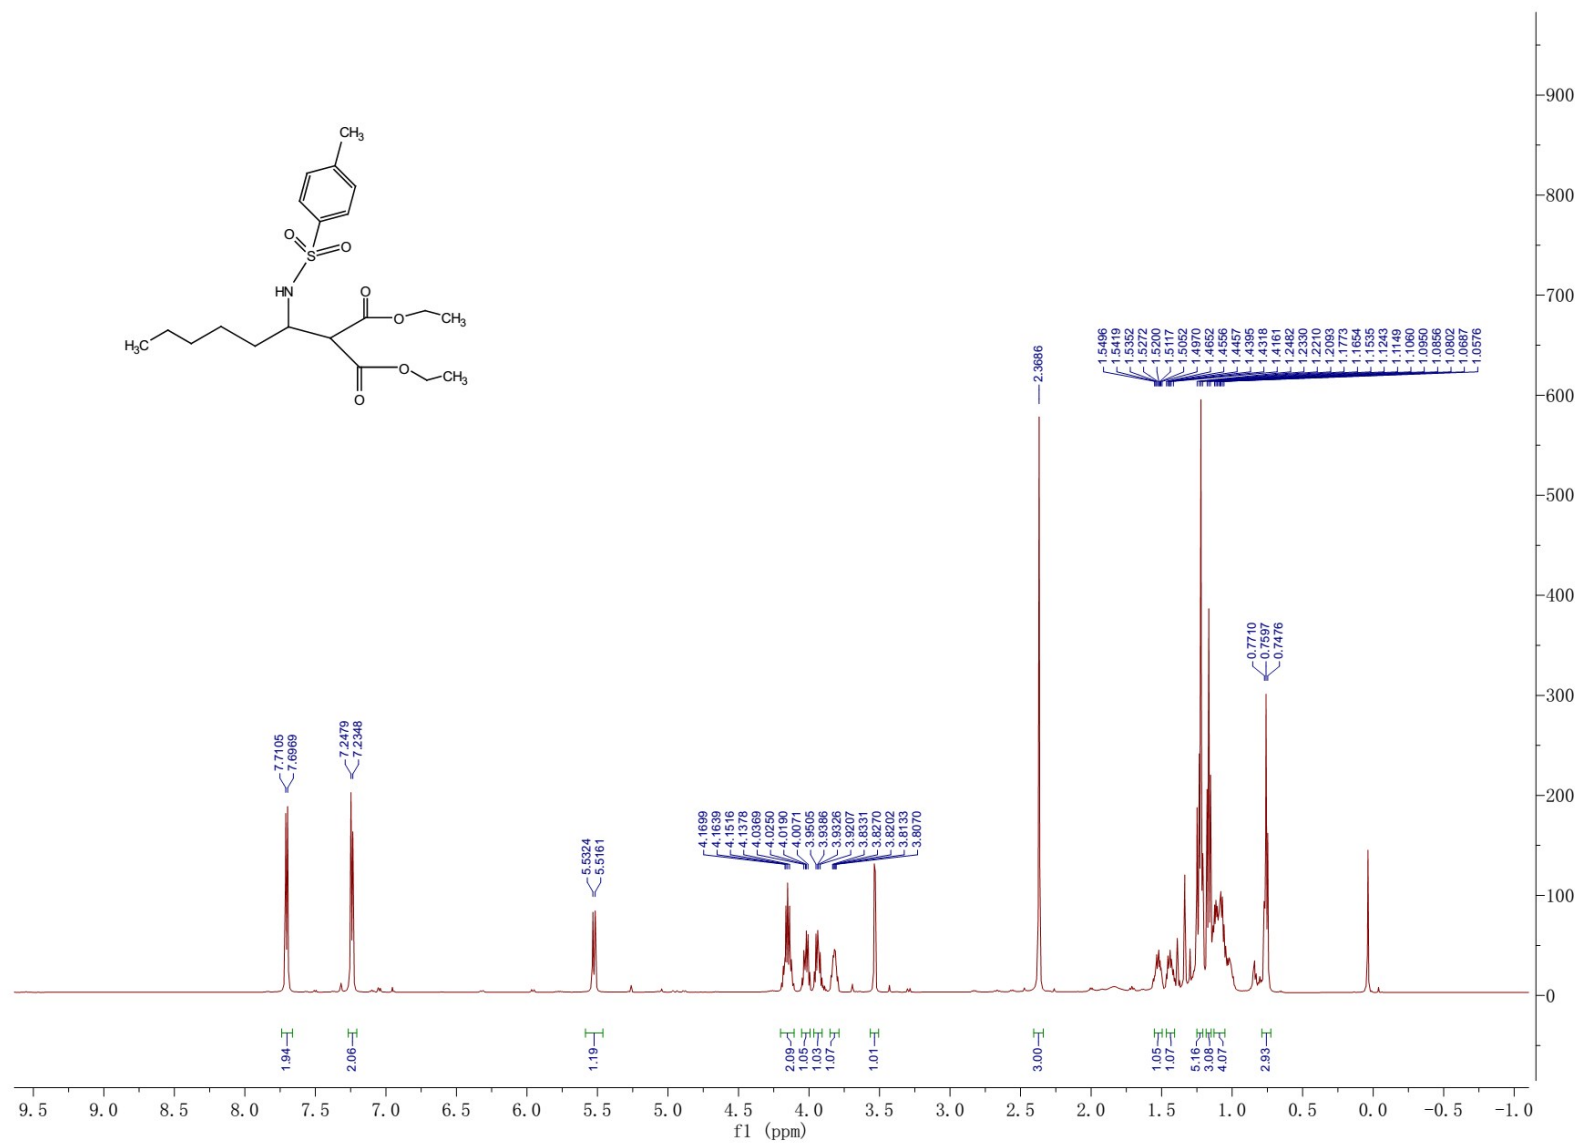

S79

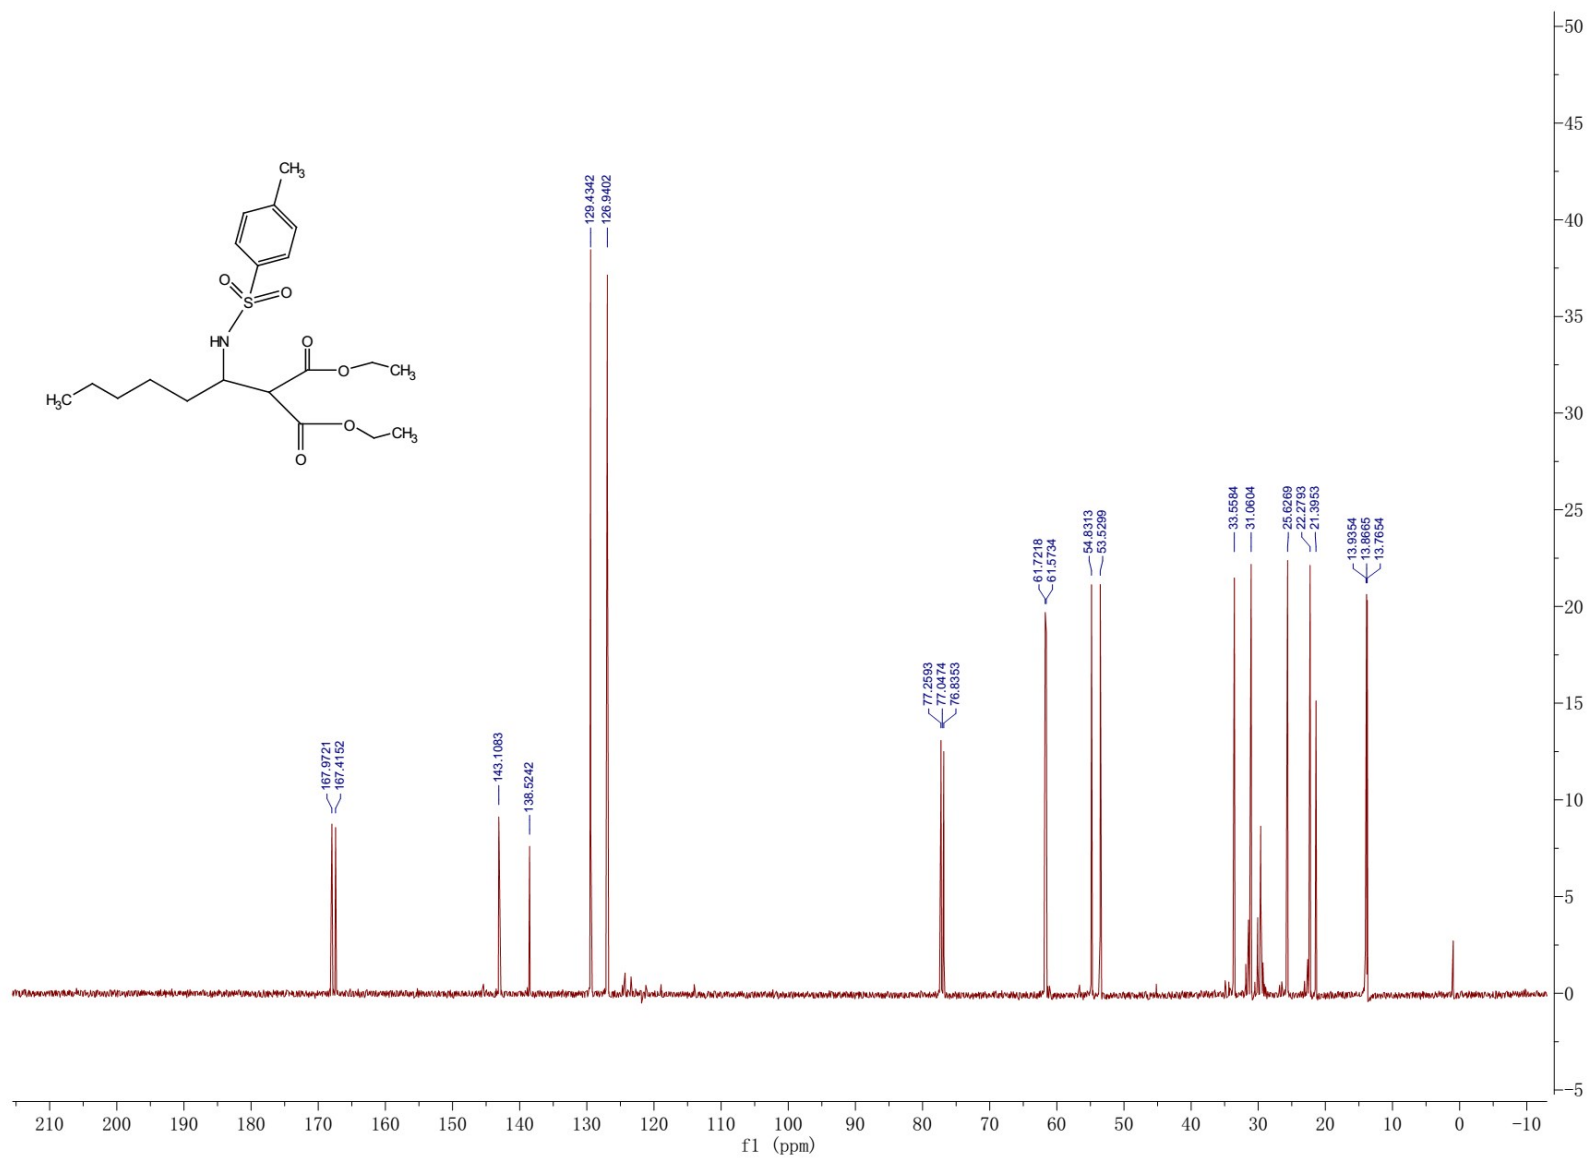



3a

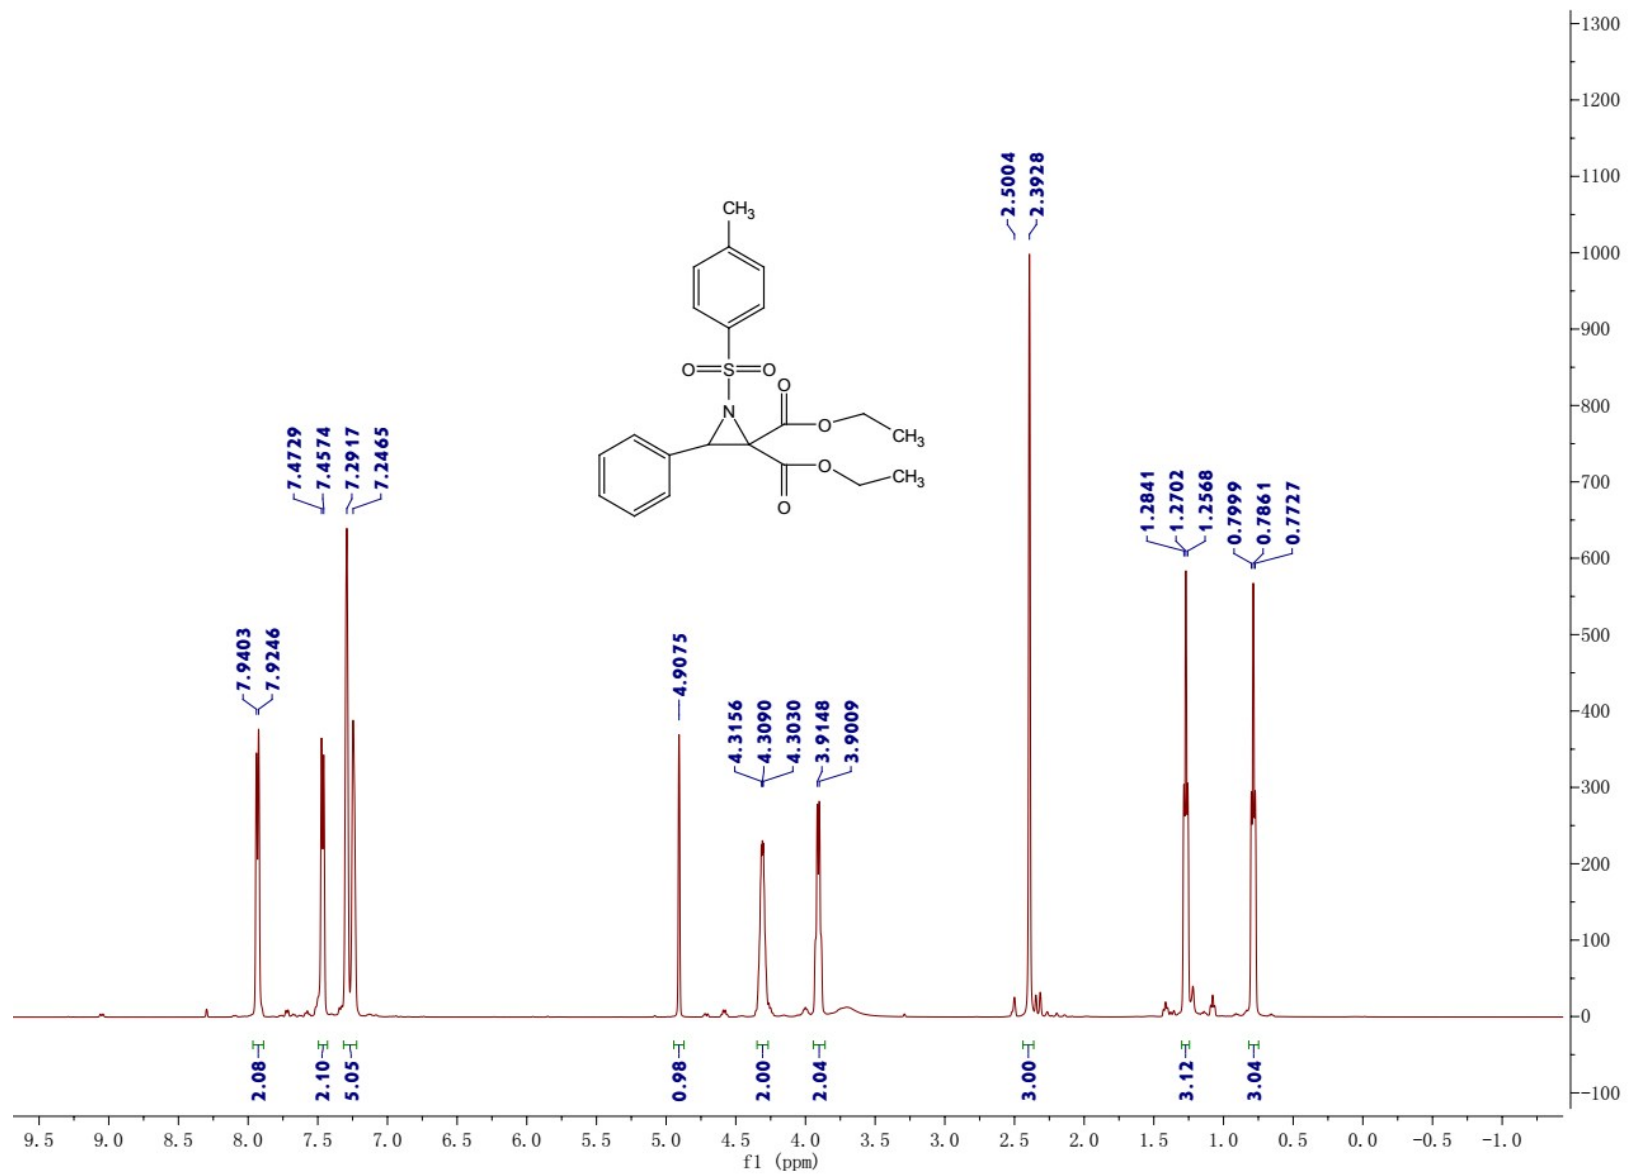

S81

3b

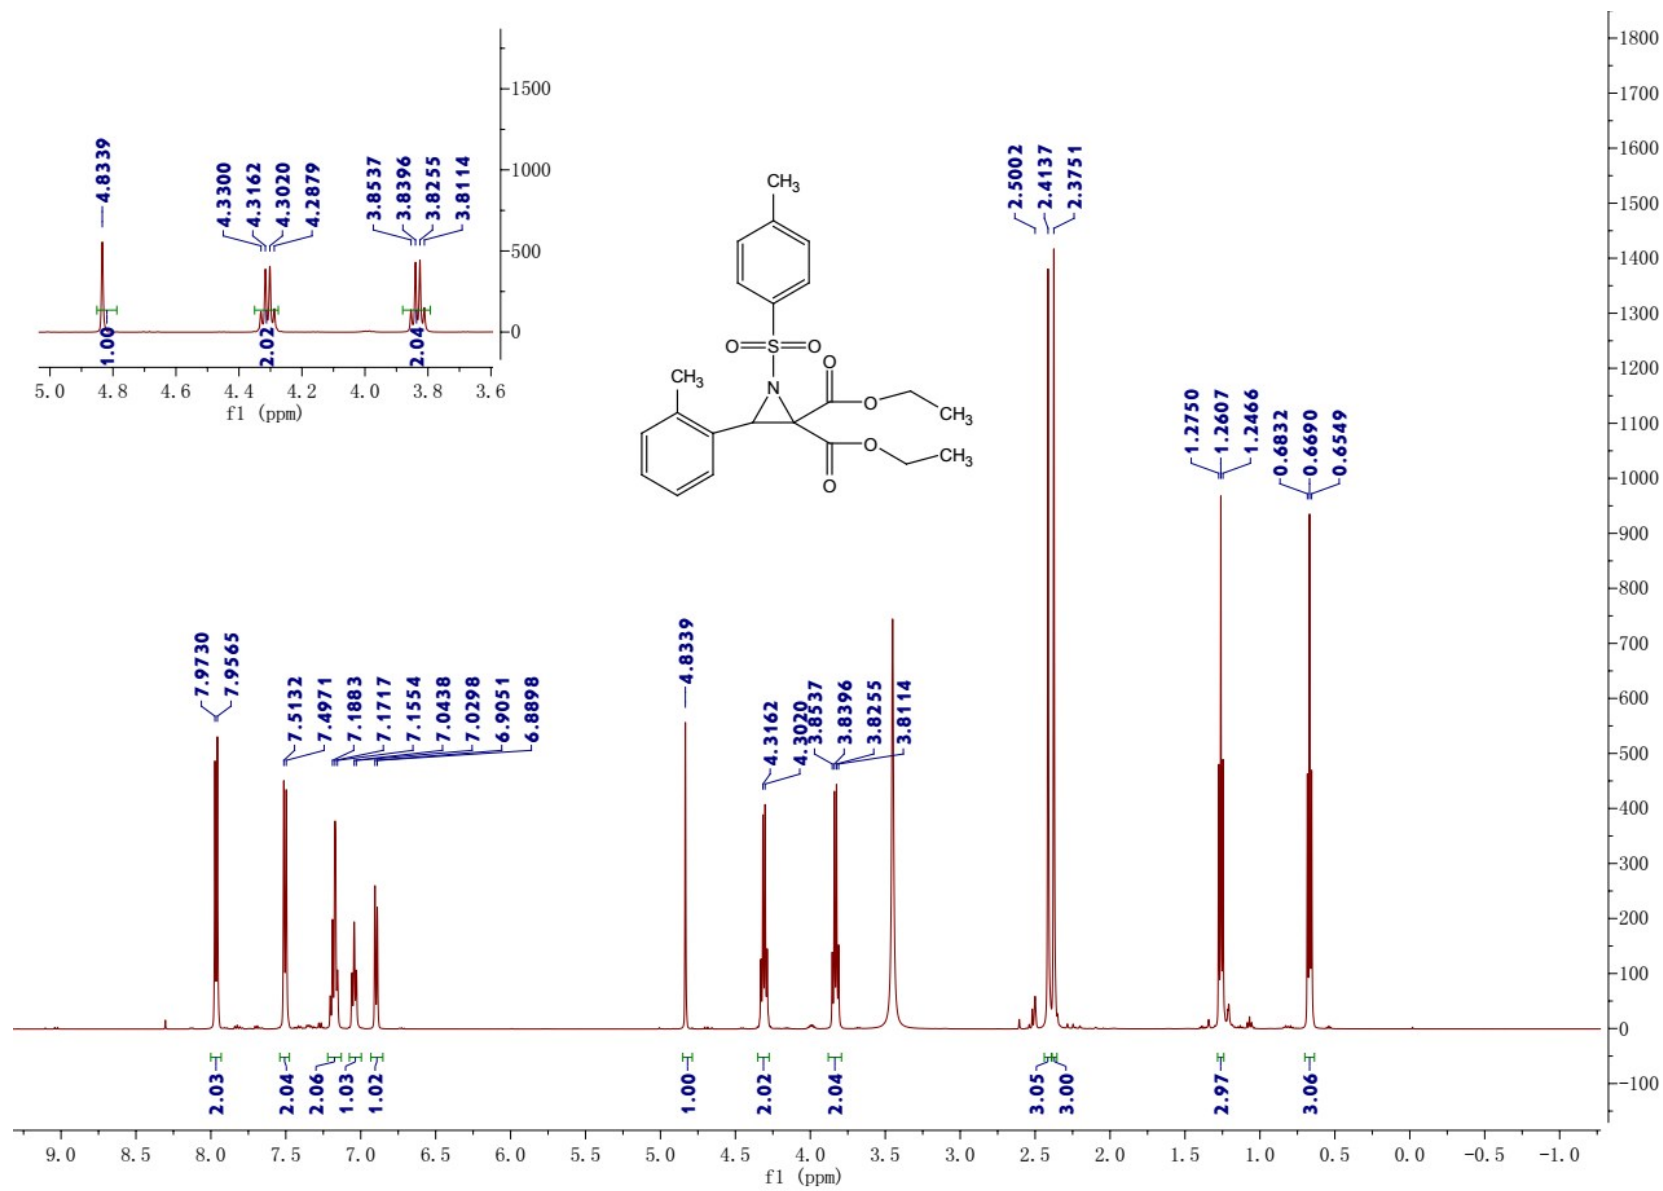

S82

3c

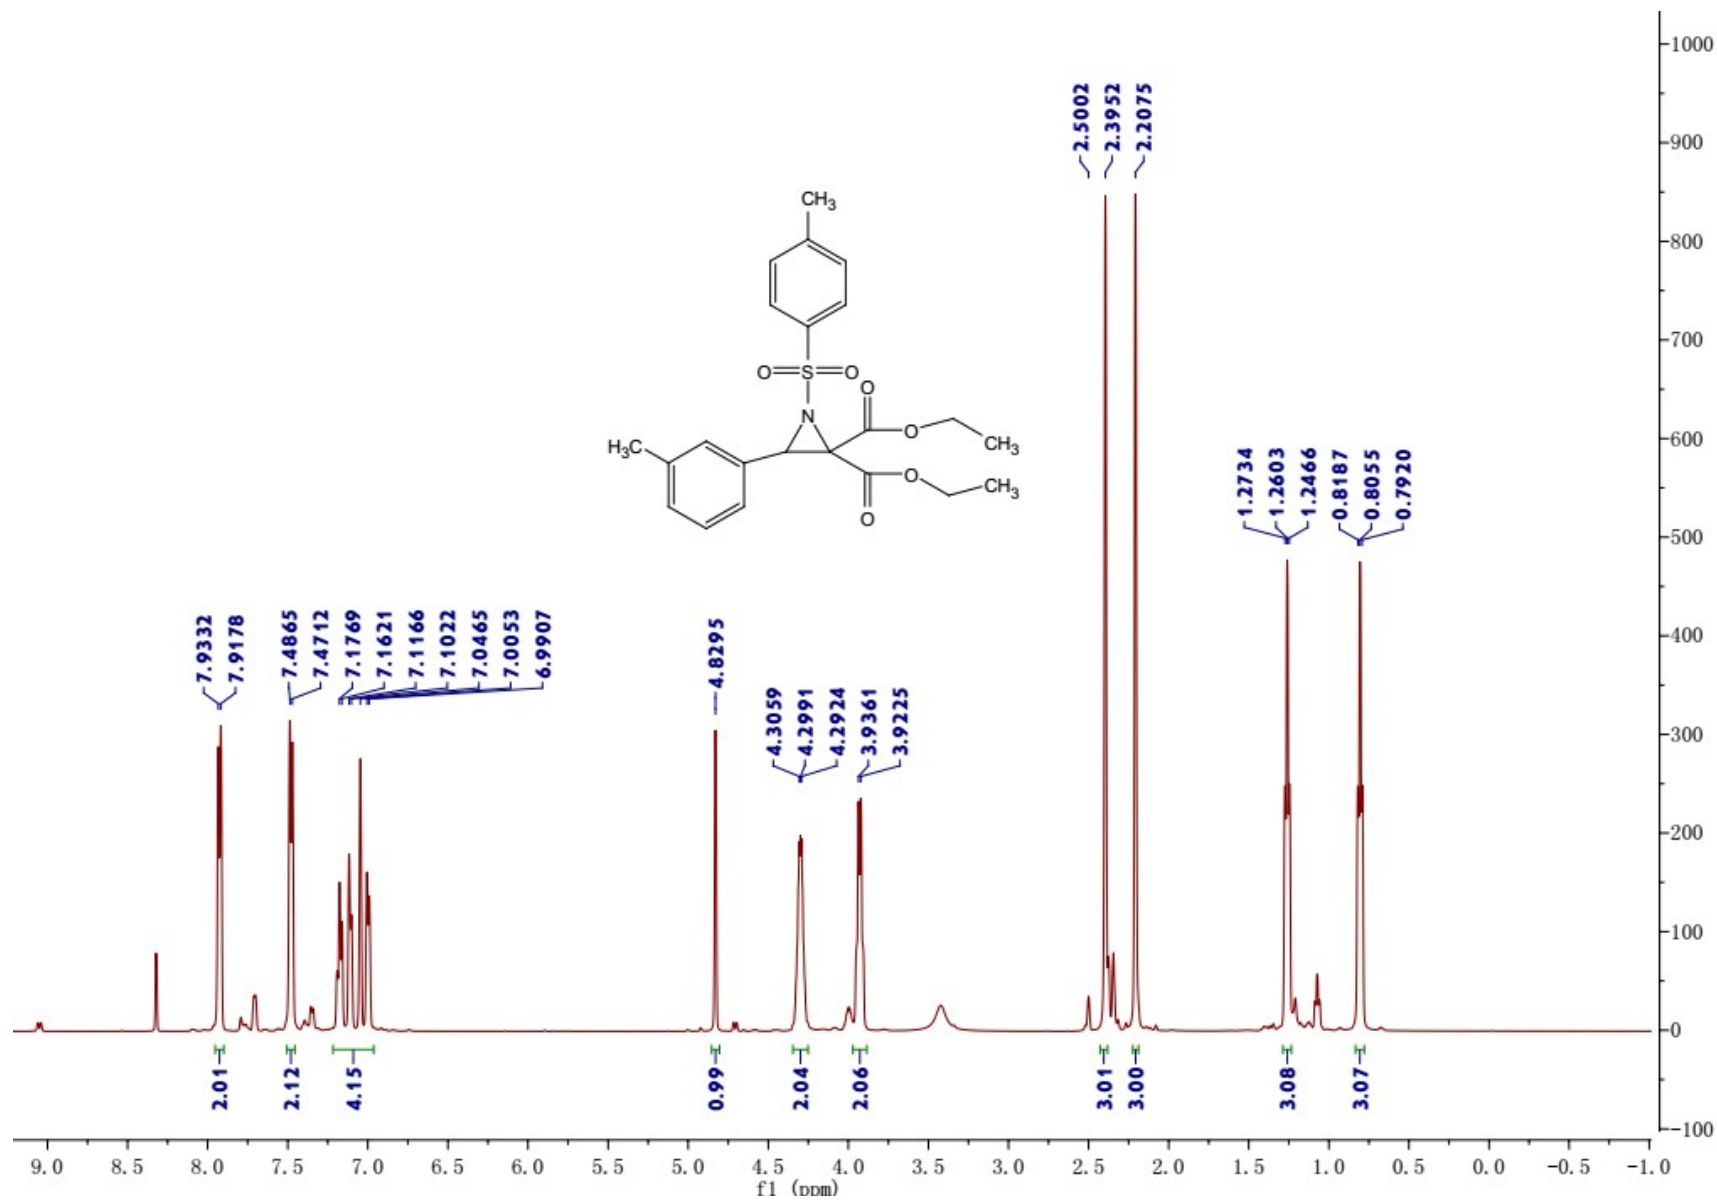

S83

3f

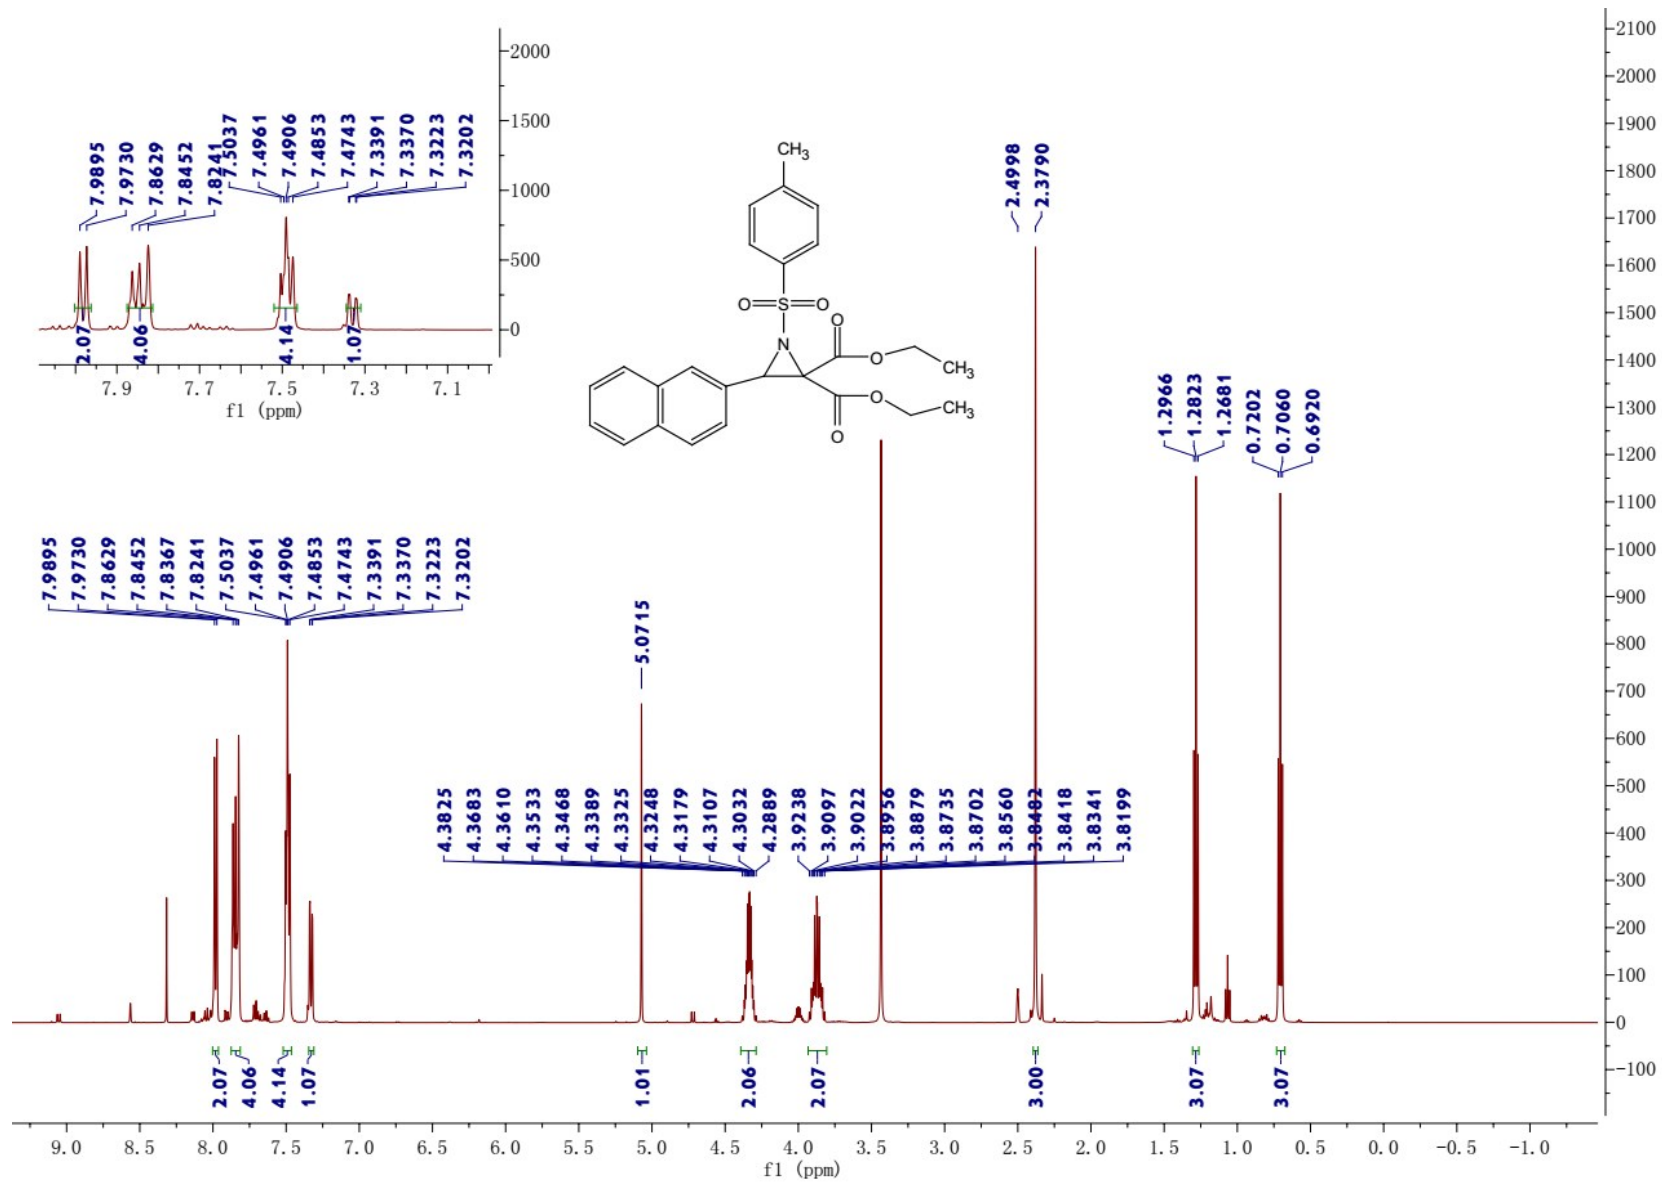

S84

3h

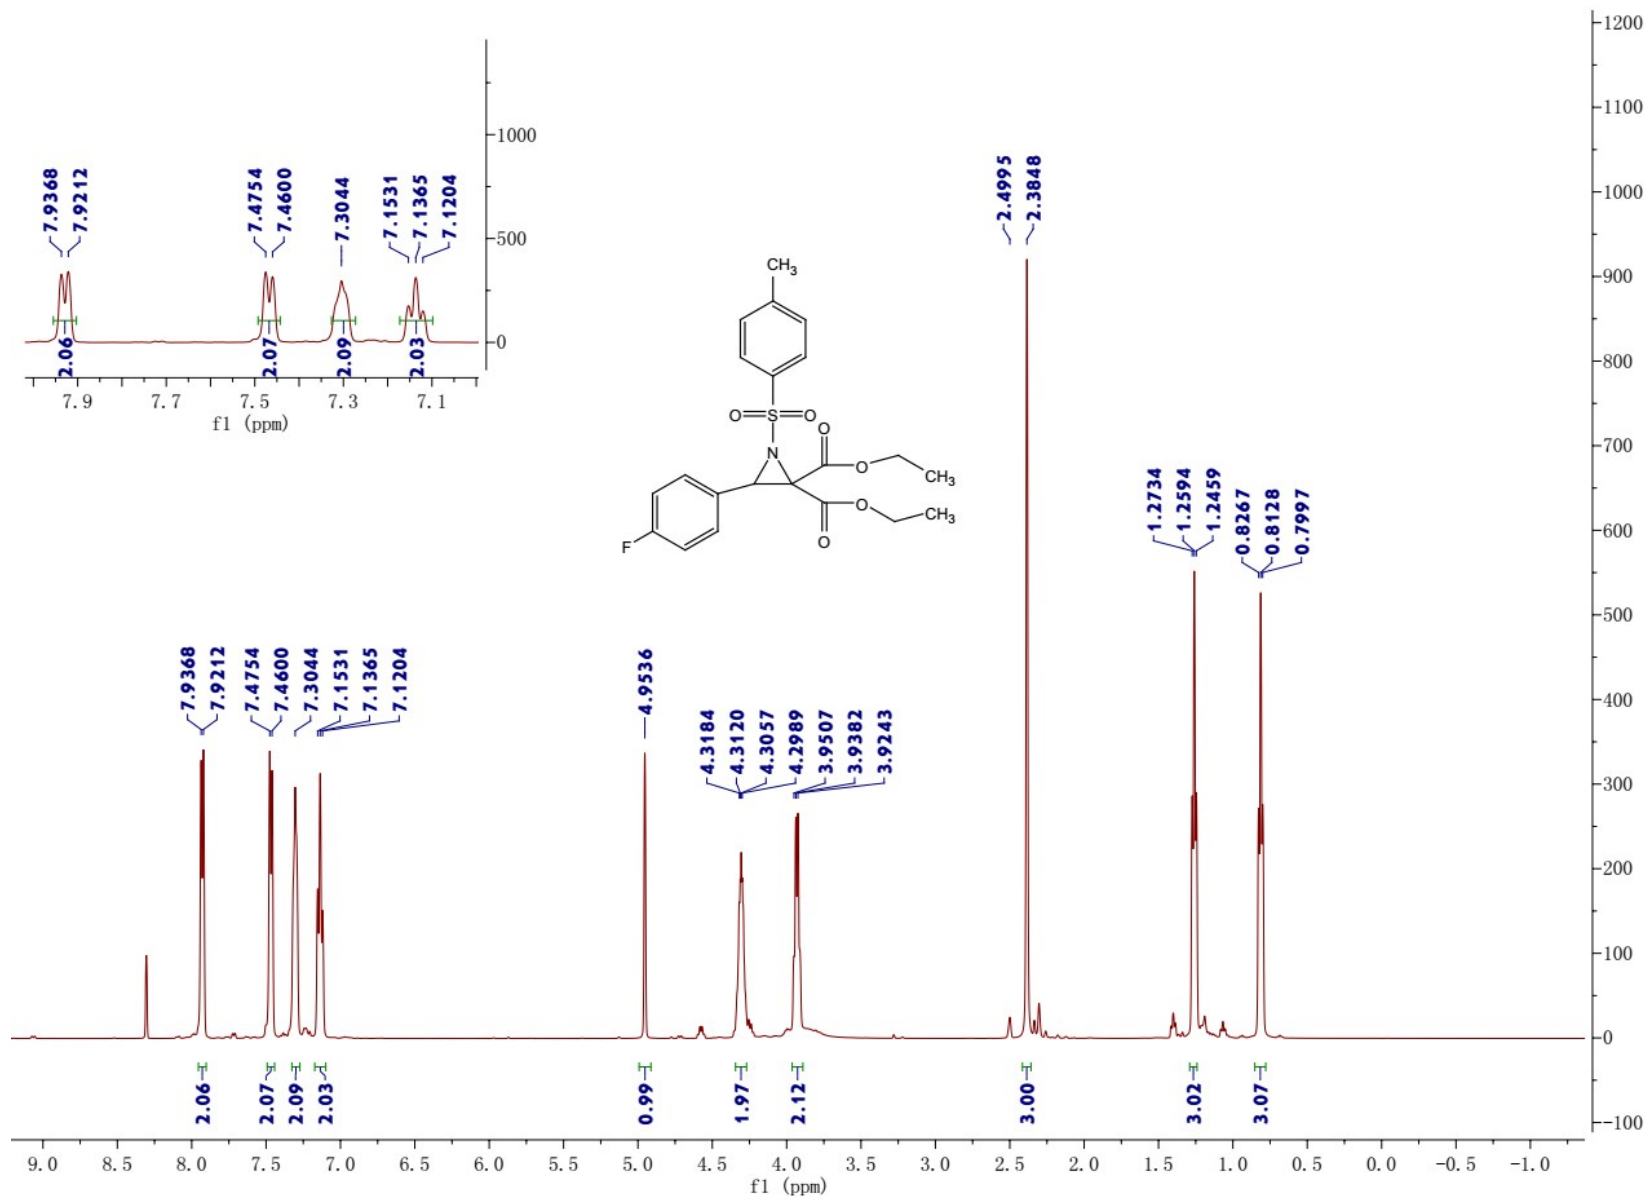

S85
